# Supplementary material for: Transcriptomic analysis reveals ethylene signal transduction genes involved in pistil development of pumpkin
Source: PeerJ. 2020 Aug 18;8:e9677. doi: 10.7717/peerj.9677 (PMC7442037; doi:10.7717/peerj.9677)
Supplement: Supplemental Information 2 [file peerj-08-9677-s002.xlsx]

## Sheet: list
			Supplementary Table 2 Differentially Expression Genes (DEGs) list (|log2 (fold change)| > 1 and FDR <0.05)

## Sheet: Supplementary Table 2
Gene_ID	Normal_readcount	Aborted_readcount	Normal_fpkm	Aborted_fpkm	log2(FC)	pvalue	p.adj	up-down-Regulation（Aborted/Normal）	Description
CmoCh00G000330	183	78	3.73	1.67	-1.10108	4.2084e-24	2.30721e-23	down	PREDICTED: glucan endo-1,3-beta-glucosidase 14 [Cucumis melo]
CmoCh00G001010	1.88	0	0.09	0.001	-4.02862	0.0312501	0.0472645	down	R-FOM-2 [Cucumis melo]
CmoCh00G001340	7	0	0.69	0.001	-5.77141	1.90744e-06	4.7317e-06	down	PREDICTED: zinc transporter 5-like [Cucumis melo]
CmoCh00G001350	32.48	5.52	1.96	0.35	-2.26443	1.93279e-12	6.88035e-12	down	PREDICTED: zinc transporter 5-like [Cucumis melo]
CmoCh01G000110	659	222	18.49	6.53	-1.44119	2.9144e-125	6.21679e-124	down	PREDICTED: exocyst complex component EXO70A1 [Cucumis melo]
CmoCh01G000170	342	127	6.43	2.5	-1.30032	1.08129e-56	1.13872e-55	down	PREDICTED: GDSL esterase/lipase 5 [Cucumis melo]
CmoCh01G000290	115	50	1.74	0.79	-1.07179	4.3815e-15	1.75821e-14	down	PREDICTED: receptor-like protein kinase [Cucumis melo]
CmoCh01G000410	5	0	9.91	0.001	-5.29651	6.10368e-05	0.00013234	down	-
CmoCh01G000430	1406	129	34.05	3.27	-3.31691	0	0	down	PREDICTED: AP2-like ethylene-responsive transcription factor AIL1 [Cucumis melo]
CmoCh01G000450	30	7	4.11	1.02	-1.95335	6.04439e-10	1.88422e-09	down	PREDICTED: transcription factor MYB114-like [Cucumis melo]// XP_004151013.2 PREDICTED: transcription factor MYB114-like isoform X2 [Cucumis sativus]
CmoCh01G000530	15	3	1.06	0.22	-2.15006	5.5513e-06	1.32279e-05	down	PREDICTED: IQ domain-containing protein IQM1 [Nelumbo nucifera]// XP_010262060.1 PREDICTED: IQ domain-containing protein IQM1 [Nelumbo nucifera]
CmoCh01G000730	11	3	0.19	0.06	-1.70712	0.000940733	0.0017873	down	PREDICTED: glutamate receptor 2.7-like [Cucumis melo]
CmoCh01G000850	31	10	0.6	0.2	-1.49316	1.44961e-07	3.89882e-07	down	PREDICTED: probable LRR receptor-like serine/threonine-protein kinase At1g51810 [Cucumis sativus]
CmoCh01G000860	12	2	0.25	0.04	-2.38884	1.50987e-05	3.47317e-05	down	PREDICTED: probable LRR receptor-like serine/threonine-protein kinase At1g51810 [Cucumis sativus]
CmoCh01G001120	1748	699	33.01	13.81	-1.19416	2.35377e-260	1.06344e-258	down	multicellular trichome development class IV homeodomain-leucine zipper transcription factor [Cucumis sativus]
CmoCh01G001170	2	0	0.82	0.001	-4.02862	0.0312501	0.0472645	down	PREDICTED: mitochondrial arginine transporter BAC2 [Citrus sinensis]// XP_015386998.1 PREDICTED: mitochondrial arginine transporter BAC2 [Citrus sinensis]
CmoCh01G001180	12	4	0.87	0.31	-1.43008	0.00208824	0.00382252	down	Melatonin-related receptor [Gossypium arboreum]
CmoCh01G001390	56	19	5.02	1.8	-1.4257	9.43236e-12	3.24499e-11	down	PREDICTED: monothiol glutaredoxin-S15, mitochondrial [Cucumis melo]
CmoCh01G001500	3	0	0.06	0.001	-4.58381	0.00390629	0.00682066	down	PREDICTED: G-type lectin S-receptor-like serine/threonine-protein kinase SD2-5 [Cucumis melo]
CmoCh01G001530	31	12	1.87	0.76	-1.23296	4.9246e-06	1.17814e-05	down	PREDICTED: protein LURP-one-related 5 [Cucumis melo]
CmoCh01G001560	13	5	0.87	0.35	-1.23082	0.00383851	0.00677226	down	PREDICTED: palmitoyl-monogalactosyldiacylglycerol delta-7 desaturase, chloroplastic-like [Cucumis sativus]// KGN52907.1 Delta 9 desaturase [Cucumis sativus]
CmoCh01G001840	21	6	1.81	0.55	-1.65981	2.7325e-06	6.69342e-06	down	PREDICTED: zinc finger protein 3-like [Cucumis melo]
CmoCh01G001980	27	4	32.65	5.68	-2.59135	1.84877e-12	6.59148e-12	down	plant/F20B17-9 protein [Medicago truncatula]// AES63637.1 plant/F20B17-9 protein [Medicago truncatula]
CmoCh01G002030	641	180	37.23	11	-1.70362	3.97936e-155	1.03954e-153	down	PREDICTED: chaperone protein dnaJ 8, chloroplastic [Cucumis melo]
CmoCh01G002040	19	4	0.93	0.2	-2.08731	2.7472e-07	7.24249e-07	down	Pesticidal crystal cry1Fa [Gossypium arboreum]
CmoCh01G002100	2	0	0.16	0.001	-4.02862	0.0312501	0.0472645	down	PREDICTED: germin-like protein subfamily 3 member 4 [Cucumis melo]
CmoCh01G002270	575	194	17.12	6.05	-1.4389	2.1259e-109	3.9561e-108	down	PREDICTED: cytochrome P450 705A5-like [Cucumis melo]
CmoCh01G002350	14	4	0.66	0.2	-1.65025	0.000268566	0.000543481	down	PREDICTED: transcription factor MYB46-like [Cucumis sativus]
CmoCh01G002480	1451	650	50.04	23.51	-1.03036	7.2465e-169	2.06529e-167	down	PREDICTED: 50S ribosomal protein L1, chloroplastic [Cucumis melo]
CmoCh01G002590	2	0	0.19	0.001	-4.02862	0.0312501	0.0472645	down	PREDICTED: flocculation protein FLO11-like [Pyrus x bretschneideri]
CmoCh01G002630	17	7	3.21	1.42	-1.13869	0.00182058	0.00335665	down	hypothetical protein Csa_3G653430 [Cucumis sativus]
CmoCh01G002880	3	0	28.87	0.001	-4.58381	0.00390629	0.00682066	down	basic helix-loop-helix protein [Populus simonii x Populus nigra]
CmoCh01G003040	61	27	4.22	1.97	-1.04452	2.83e-08	7.98309e-08	down	PREDICTED: E3 ubiquitin-protein ligase MARCH8 isoform X1 [Ziziphus jujuba]
CmoCh01G003350	261	69	3.42	0.94	-1.78957	1.70462e-68	2.11048e-67	down	RCC1 domain-containing protein/FYVE domain-containing protein/BRX domain-containing protein/BRX_N domain-containing protein [Cephalotus follicularis]
CmoCh01G003460	90	36	8.1	3.43	-1.1912	3.07616e-14	1.19373e-13	down	PREDICTED: zinc finger protein 4-like [Cucumis melo]
CmoCh01G003690	577	245	14.51	6.45	-1.10737	1.46628e-73	1.93168e-72	down	PREDICTED: 2-isopropylmalate synthase 2, chloroplastic-like [Cucumis melo]
CmoCh01G003980	6	1	0.84	0.15	-2.32517	0.00257689	0.00466403	down	hypothetical protein Csa_3G298580 [Cucumis sativus]
CmoCh01G004060	2	0	0.08	0.001	-4.02862	0.0312501	0.0472645	down	PREDICTED: cytokinin hydroxylase-like [Cucumis melo]
CmoCh01G004390	32	1	1.94	0.06	-4.71503	4.57003e-23	2.43334e-22	down	PREDICTED: transcription factor TCP17-like isoform X1 [Cucumis melo]
CmoCh01G004480	239	56	8.61	2.12	-1.96318	4.81144e-71	6.13904e-70	down	PREDICTED: COBRA-like protein 1 [Cucumis melo]
CmoCh01G004790	59	26	5.06	2.36	-1.05074	3.10622e-08	8.73635e-08	down	PREDICTED: protein CHLORORESPIRATORY REDUCTION 7, chloroplastic-like [Gossypium hirsutum]
CmoCh01G005270	9	0	0.51	0.001	-6.1281	2.98049e-08	8.38956e-08	down	PREDICTED: sugar transport protein 10-like [Cucumis melo]
CmoCh01G005320	748	132	50.02	9.3	-2.37341	2.00811e-277	9.76075e-276	down	PREDICTED: alpha carbonic anhydrase 7-like [Cucumis melo]
CmoCh01G005380	3	0	3.1	0.001	-4.58381	0.00390629	0.00682066	down	-
CmoCh01G005390	5309	5	146.95	0.14	-9.89023	0	0	down	DUF547 domain-containing protein/Lzipper-MIP1 domain-containing protein [Cephalotus follicularis]
CmoCh01G005400	1933	141	32.59	2.49	-3.64791	0	0	down	PREDICTED: ABC transporter G family member 28 [Cucumis melo]
CmoCh01G005410	2	0	0.71	0.001	-4.02862	0.0312501	0.0472645	down	PREDICTED: ABC transporter G family member 28 [Cucumis sativus]
CmoCh01G005490	1825	561.9	49.55	15.98	-1.57101	0	0	down	PREDICTED: heavy metal-associated isoprenylated plant protein 3-like [Cucumis melo]
CmoCh01G005600	243	1	14.35	0.06	-7.63475	9.01692e-199	3.06798e-197	down	PREDICTED: tetraspanin-3-like [Cucumis melo]
CmoCh01G005890	17	6	0.48	0.18	-1.35705	0.000357998	0.000715995	down	PREDICTED: exocyst complex component EXO70A1-like [Cucumis melo]
CmoCh01G005900	72	25	2.56	0.93	-1.39376	2.70593e-14	1.05467e-13	down	PREDICTED: 3-ketoacyl-CoA synthase 12-like [Cucumis melo]
CmoCh01G005960	288	68	4.93	1.22	-1.95254	5.73054e-85	8.55546e-84	down	PREDICTED: protein UPSTREAM OF FLC [Cucumis melo]
CmoCh01G005990	9	2	2.93	0.71	-1.97896	0.00053508	0.0010461	down	BnaA07g13880D [Brassica napus]
CmoCh01G006030	2	0	0.19	0.001	-4.02862	0.0312501	0.0472645	down	PREDICTED: zinc finger protein CONSTANS-LIKE 3-like [Cucumis melo]
CmoCh01G006500	59	21	2.18	0.81	-1.35729	1.66497e-11	5.6622e-11	down	PREDICTED: LOW QUALITY PROTEIN: mucin-20 [Cucumis sativus]
CmoCh01G006660	828	321	14.49	5.88	-1.23871	3.15784e-132	7.0299e-131	down	PREDICTED: UDP-glucose iridoid glucosyltransferase-like [Cucumis melo]
CmoCh01G006840	212	25	2.83	0.35	-2.95003	3.15279e-101	5.47173e-100	down	PREDICTED: cardiomyopathy-associated protein 5 [Pyrus x bretschneideri]
CmoCh01G006870	12	1	0.43	0.04	-3.30973	6.67875e-08	1.83717e-07	down	PREDICTED: cytochrome P450 86A1 [Cucumis melo]
CmoCh01G007140	14	5	1.36	0.52	-1.33671	0.00184169	0.00339263	down	PREDICTED: RING-H2 finger protein ATL63 isoform X1 [Cucumis melo]// XP_008457346.1 PREDICTED: RING-H2 finger protein ATL63 isoform X2 [Cucumis melo]// XP_008457348.1 PREDICTED: RING-H2 finger protein ATL63 isoform X3 [Cucumis melo]
CmoCh01G007160	2	0	0.08	0.001	-4.02862	0.0312501	0.0472645	down	PREDICTED: probable N-acetyltransferase HLS1 [Cucumis melo]
CmoCh01G007320	2	0	0.06	0.001	-4.02862	0.0312501	0.0472645	down	PREDICTED: laccase-3 [Cucumis melo]
CmoCh01G007400	2	0	0.31	0.001	-4.02862	0.0312501	0.0472645	down	Wound-induced protein, Wun1 [Corchorus olitorius]
CmoCh01G007830	690	84	21.33	2.72	-2.90832	6.50536235879169e-320	3.68147581276501e-318	down	PREDICTED: protein SHOOT GRAVITROPISM 5-like [Cucumis melo]
CmoCh01G007900	52	4	1.25	0.1	-3.53356	3.40251e-30	2.21216e-29	down	PREDICTED: homeobox-leucine zipper protein HDG11-like [Cucumis melo]
CmoCh01G007930	73	19	5.44	1.49	-1.80739	1.60266e-20	7.89864e-20	down	DUF761 domain-containing protein/DUF4408 domain-containing protein [Cephalotus follicularis]
CmoCh01G007970	31	0	2.5	0.001	-7.89766	7.43933e-26	4.30279e-25	down	PREDICTED: xyloglucan endotransglucosylase/hydrolase protein 9-like [Cucumis melo]
CmoCh01G008000	387	106	18.1	5.21	-1.73909	3.23016e-97	5.43819e-96	down	nucleotide-diphospho-sugar transferase family protein [Medicago truncatula]// AES76546.1 nucleotide-diphospho-sugar transferase family protein [Medicago truncatula]
CmoCh01G008180	17	6	0.92	0.34	-1.35705	0.000357998	0.000715995	down	PREDICTED: HVA22-like protein a [Cucumis melo]
CmoCh01G008790	207	78	7.35	2.91	-1.27875	4.07745e-34	2.90975e-33	down	DUF247 domain-containing protein [Cephalotus follicularis]
CmoCh01G009100	23	10	0.74	0.34	-1.06463	0.000770001	0.00148069	down	endo-1,4-beta-glucanase B16 [Populus tomentosa]
CmoCh01G009250	7	0	0.22	0.001	-5.77141	1.90744e-06	4.7317e-06	down	PREDICTED: protein NRT1/ PTR FAMILY 4.4 [Cucumis melo]
CmoCh01G009470	3.5	0	0.21	0.001	-4.98373	0.00048829	0.000958718	down	PREDICTED: aspartic proteinase PCS1-like [Cucumis sativus]
CmoCh01G009530	40	18	175.75	98.54	-1.01912	1.15791e-05	2.69436e-05	down	PREDICTED: mitotic-spindle organizing protein 1A-like [Cucumis melo]// XP_008441752.1 PREDICTED: mitotic-spindle organizing protein 1A-like [Cucumis melo]// XP_008441753.1 PREDICTED: mitotic-spindle organizing protein 1A-like [Cucumis melo]// XP_008441755.1 PREDICTED: mitotic-spindle organizing protein 1A-like [Cucumis melo]// XP_008441756.1 PREDICTED: mitotic-spindle organizing protein 1A-like […
CmoCh01G009590	31.9	11.19	7.82	2.97	-1.40282	4.36276e-07	1.13496e-06	down	ribosomal protein S7 (plastid) [Cucurbita argyrosperma]// ALO21825.1 ribosomal protein S7 (plastid) [Cucurbita argyrosperma var. palmeri]// ALO21886.1 ribosomal protein S7 (plastid) [Cucurbita argyrosperma subsp. sororia]// ALO21935.1 ribosomal protein S7 (plastid) [Cucurbita cordata]// ALO21969.1 ribosomal protein S7 (plastid) [Cucurbita digitata]// ALO22036.1 ribosomal protein S7 (plastid) [Cuc…
CmoCh01G009600	6.08	0	2.31	0.001	-5.55341	1.52593e-05	3.49815e-05	down	ribosomal protein S12 (chloroplast) [Ipomoea batatas]// YP_009128460.1 ribosomal protein S12 (chloroplast) [Ipomoea batatas]// AJP09609.1 ribosomal protein S12 (chloroplast) [Ipomoea batatas]// AJP09632.1 ribosomal protein S12 (chloroplast) [Ipomoea batatas]
CmoCh01G009620	8	1	0.89	0.12	-2.73251	8.79809e-05	0.000187486	down	PREDICTED: cucumber peeling cupredoxin-like [Cucumis melo]
CmoCh01G009630	33	6	65.42	14.34	-2.30864	4.25193e-13	1.56599e-12	down	Mediator of RNA polymerase II transcription subunit 8 [Theobroma cacao]
CmoCh01G009680	3	0	0.64	0.001	-4.58381	0.00390629	0.00682066	down	PREDICTED: histidinol-phosphate aminotransferase, chloroplastic isoform X1 [Lupinus angustifolius]
CmoCh01G009790	36.5	10	1.71	0.49	-1.70805	4.42926e-10	1.39525e-09	down	PREDICTED: aspartic proteinase PCS1-like [Cucumis sativus]
CmoCh01G010050	98	44	3.71	1.75	-1.02525	3.16684e-12	1.11452e-11	down	PREDICTED: probable choline kinase 1 isoform X1 [Cucumis melo]// XP_008461906.1 PREDICTED: probable choline kinase 1 isoform X1 [Cucumis melo]
CmoCh01G010260	5	0	16.93	0.001	-5.29651	6.10368e-05	0.00013234	down	-
CmoCh01G010350	3	0	0.14	0.001	-4.58381	0.00390629	0.00682066	down	PREDICTED: alcohol dehydrogenase-like [Cucumis melo]
CmoCh01G010420	67	0	6.98	0.001	-9.0063	3.94226e-57	4.17238e-56	down	-
CmoCh01G010690	52	11	2.51	0.56	-2.101	5.96052e-18	2.68374e-17	down	PREDICTED: wall-associated receptor kinase 2-like [Cucumis sativus]
CmoCh01G010740	158	58	11.79	4.57	-1.31598	2.46122e-27	1.48785e-26	down	PREDICTED: NAD(P)H-quinone oxidoreductase subunit M, chloroplastic [Cucumis melo]
CmoCh01G010810	2	0	2.14	0.001	-4.02862	0.0312501	0.0472645	down	PREDICTED: GPI-anchored protein LORELEI-like [Citrus sinensis]
CmoCh01G010870	2	0	1.64	0.001	-4.02862	0.0312501	0.0472645	down	-
CmoCh01G011020	7	2	4.86	1.58	-1.62228	0.00935554	0.0155574	down	serine-rich family protein [Populus trichocarpa]// EEE83690.1 serine-rich family protein [Populus trichocarpa]
CmoCh01G011050	2	0	12.81	0.001	-4.02862	0.0312501	0.0472645	down	-
CmoCh01G011450	82	23	4.39	1.3	-1.70077	4.75529e-21	2.38587e-20	down	PREDICTED: pirin-like protein [Cucumis melo]
CmoCh01G011460	28	6	0.61	0.14	-2.07262	2.70411e-10	8.61864e-10	down	PREDICTED: glycerophosphodiester phosphodiesterase GDPDL4-like [Cucumis melo]// XP_008447693.1 PREDICTED: glycerophosphodiester phosphodiesterase GDPDL4-like [Cucumis melo]
CmoCh01G011590	118	53	4.5	2.12	-1.02503	1.38562e-14	5.46711e-14	down	PREDICTED: indole-3-acetate O-methyltransferase 1 [Cucumis melo]
CmoCh01G011760	9	2	9.79	2.54	-1.97896	0.00053508	0.0010461	down	-
CmoCh01G011770	30	11	5.47	2.15	-1.3101	2.78887e-06	6.82424e-06	down	PREDICTED: casein kinase II subunit beta-2 [Cucumis melo]
CmoCh01G011800	167	50	20.45	6.51	-1.60949	1.4218e-38	1.10817e-37	down	PREDICTED: protein translation factor SUI1 homolog [Ziziphus jujuba]
CmoCh01G012150	2	0	0.07	0.001	-4.02862	0.0312501	0.0472645	down	PREDICTED: organic cation/carnitine transporter 4-like [Cucumis melo]
CmoCh01G012240	803	338	16.09	7.09	-1.12006	1.60463e-108	2.96604e-107	down	PREDICTED: G-type lectin S-receptor-like serine/threonine-protein kinase At4g27290 [Cucumis melo]
CmoCh01G012350	7	0	1.17	0.001	-5.77141	1.90744e-06	4.7317e-06	down	PREDICTED: dynein light chain LC6, flagellar outer arm [Cucumis melo]
CmoCh01G012380	4	0	0.49	0.001	-4.98373	0.00048829	0.000958718	down	PREDICTED: protein ULTRAPETALA 1-like [Cucumis sativus]
CmoCh01G012460	5	0	5.44	0.001	-5.29651	6.10368e-05	0.00013234	down	PREDICTED: uncharacterized protein LOC105435142 [Cucumis sativus]// KGN59895.1 hypothetical protein Csa_3G852440 [Cucumis sativus]
CmoCh01G012510	3269	1371	141.73	62.42	-1.12551	0	0	down	Protochlorophyllide reductase, chloroplastic [Cucumis sativus]
CmoCh01G012530	213	48	9.66	2.29	-2.019	5.37498e-66	6.43224e-65	down	PREDICTED: stem-specific protein TSJT1 isoform X1 [Cucumis melo]
CmoCh01G012750	668	224	98.81	35.36	-1.44782	6.31746e-128	1.3731e-126	down	PREDICTED: ethylene-responsive transcription factor 4 [Cucumis melo]
CmoCh01G012810	9	0	1.88	0.001	-6.1281	2.98049e-08	8.38956e-08	down	PREDICTED: protein CUP-SHAPED COTYLEDON 2-like [Cucumis melo]
CmoCh01G012900	405	171	13.56	6	-1.11534	1.07961e-52	1.06952e-51	down	PREDICTED: transcription factor TCP4 [Cucumis melo]
CmoCh01G013050	9	0	0.83	0.001	-6.1281	2.98049e-08	8.38956e-08	down	PREDICTED: probable protein phosphatase 2C 55 [Cucumis melo]
CmoCh01G013120	29	12	2.58	1.13	-1.13717	3.79294e-05	8.39964e-05	down	PREDICTED: probable protein phosphatase 2C 55 [Cucumis melo]
CmoCh01G013260	129	40	4.88	1.59	-1.55841	8.48473e-29	5.33028e-28	down	PREDICTED: bidirectional sugar transporter SWEET2-like [Pyrus x bretschneideri]
CmoCh01G013310	1075.91	452.02	11	4.83	-1.12304	2.13014e-145	5.22766e-144	down	BnaAnng23100D [Brassica napus]
CmoCh01G013430	3.05	0	0.75	0.001	-4.58381	0.00390629	0.00682066	down	PREDICTED: 36.4 kDa proline-rich protein [Cucumis sativus]
CmoCh01G013470	27	8	1.07	0.33	-1.61242	3.27886e-07	8.60295e-07	down	PREDICTED: anthocyanidin 3-O-glucosyltransferase 2-like [Cucumis melo]
CmoCh01G013600	25	0	5.6	0.001	-7.58877	2.11904e-22	1.10315e-21	down	auxin-responsive family protein [Populus trichocarpa]// EEE98233.2 auxin-responsive family protein [Populus trichocarpa]
CmoCh01G013740	6	0	0.34	0.001	-5.55341	1.52593e-05	3.49815e-05	down	PREDICTED: protein PHOSPHATE STARVATION RESPONSE 1 [Vitis vinifera]
CmoCh01G014030	32	7	1.3	0.3	-2.04606	3.59944e-11	1.20417e-10	down	coiled-coil protein [Arabidopsis thaliana]// NP_001330291.1 coiled-coil protein [Arabidopsis thaliana]// AAK53014.1 AT5g45310/K9E15_9 [Arabidopsis thaliana]// AAL31166.1 AT5g45310/K9E15_9 [Arabidopsis thaliana]// AED95231.1 coiled-coil protein [Arabidopsis thaliana]// ANM68545.1 coiled-coil protein [Arabidopsis thaliana]
CmoCh01G014620	36	3	1.44	0.13	-3.40581	7.24351e-21	3.6152e-20	down	PREDICTED: endoplasmic reticulum-Golgi intermediate compartment protein 3-like [Cucumis melo]
CmoCh01G014710	35	1	0.94	0.03	-4.84381	1.27517e-25	7.32315e-25	down	PREDICTED: inactive TPR repeat-containing thioredoxin TTL3 [Cucumis melo]
CmoCh01G014760	124	11	2.34	0.22	-3.35266	1.28637e-67	1.57496e-66	down	PREDICTED: synaptonemal complex protein 1-like [Cucumis melo]
CmoCh01G014870	107	11	15.83	1.74	-3.14017	7.79223e-55	7.97749e-54	down	PREDICTED: ethylene-responsive transcription factor ERF043-like [Cucumis sativus]// KGN60322.1 AP2 domain class transcription factor [Cucumis sativus]
CmoCh01G015120	914	389	17.3	7.7	-1.10415	2.44977e-120	5.03472e-119	down	PREDICTED: phosphoenolpyruvate carboxykinase [ATP] [Cucumis melo]
CmoCh01G015130	31	1	1.87	0.06	-4.66942	3.22215e-22	1.66703e-21	down	PREDICTED: transcription factor bHLH61-like [Cucumis melo]
CmoCh01G015170	14	2	0.33	0.05	-2.60901	6.24134e-07	1.60473e-06	down	PREDICTED: oligopeptide transporter 2 [Cucumis melo]
CmoCh01G015290	850	59	14.04	1.02	-3.71794	0	0	down	PREDICTED: serine/threonine-protein kinase CTR1 [Cucumis melo]
CmoCh01G015350	30	12	4.49	1.92	-1.18586	1.38674e-05	3.20196e-05	down	PREDICTED: ethylene-responsive transcription factor ERF003-like [Cucumis sativus]
CmoCh01G015430	13	5	0.28	0.11	-1.23082	0.00383851	0.00677226	down	heat shock protein 70 [Cucumis melo subsp. melo]
CmoCh01G015720	1009	408	22.29	9.43	-1.17801	8.07799e-148	2.01657e-146	down	Transmembrane protein DDB_G0292058, partial [Anthurium amnicola]
CmoCh01G015730	97.8	40.49	8.28	3.62	-1.16236	9.25485e-15	3.67262e-14	down	Os05g0575000, partial [Oryza sativa Japonica Group]
CmoCh01G016010	9	0	2.95	0.001	-6.1281	2.98049e-08	8.38956e-08	down	PREDICTED: cryptochrome DASH, chloroplastic/mitochondrial isoform X2 [Cucumis melo]
CmoCh01G016080	3	0	11.05	0.001	-4.58381	0.00390629	0.00682066	down	-
CmoCh01G016100	162	73	4.08	1.92	-1.02079	2.00661e-19	9.49881e-19	down	PREDICTED: rust resistance kinase Lr10-like [Cucumis melo]
CmoCh01G016160	2880	1033	81.5	30.62	-1.35109	0	0	down	PREDICTED: E3 ubiquitin-protein ligase MBR2 [Theobroma cacao]// XP_017983627.1 PREDICTED: E3 ubiquitin-protein ligase MBR2 [Theobroma cacao]
CmoCh01G016340	49	20	3.4	1.46	-1.15999	7.88671e-08	2.15975e-07	down	PREDICTED: trihelix transcription factor ASR3 [Cucumis melo]
CmoCh01G016670	7	0	1.5	0.001	-5.77141	1.90744e-06	4.7317e-06	down	PREDICTED: SKI/DACH domain-containing protein 1 [Cucumis melo]
CmoCh01G017080	163	61	5.97	2.34	-1.28828	1.70042e-27	1.03224e-26	down	PREDICTED: transcription initiation factor TFIID subunit 5 [Cucumis melo]
CmoCh01G017230	36.2	0.98	5.68	0.16	-4.88431	3.4367e-26	2.00839e-25	down	PREDICTED: DNA-damage-repair/toleration protein DRT100-like [Cucumis melo]
CmoCh01G017280	290	113	11.13	4.55	-1.23081	1.39548e-44	1.21823e-43	down	PREDICTED: uncharacterized transporter C405.03c-like [Cucumis sativus]
CmoCh01G017290	42	15.17	2.74	1.04	-1.35042	1.85241e-08	5.2926e-08	down	PREDICTED: peroxidase 18 [Cucumis melo]
CmoCh01G017440	21	9	2.79	1.27	-1.08427	0.000972893	0.00184599	down	PREDICTED: ethylene-responsive transcription factor ERF017-like [Cucumis melo]
CmoCh01G017490	304	38	76.9	10.42	-2.86805	5.28086e-140	1.25358e-138	down	Arginine--tRNA ligase [Gossypium arboreum]
CmoCh01G017640	511	144	34.82	10.34	-1.69839	2.20497e-123	4.66019e-122	down	PREDICTED: probable protein phosphatase 2C 72 [Gossypium arboreum]
CmoCh01G017750	2	0	19.25	0.001	-4.02862	0.0312501	0.0472645	down	-
CmoCh01G017770	1121	155	59.24	8.61	-2.72546	0	0	down	PREDICTED: myb-like protein AA [Arachis ipaensis]
CmoCh01G017910	114	43	4.37	1.73	-1.27623	2.76338e-19	1.30253e-18	down	Harbinger transposase-derived nuclease [Corchorus capsularis]
CmoCh01G017970	5	1	1.54	0.34	-2.06827	0.012726	0.0207238	down	PREDICTED: 17.1 kDa class II heat shock protein-like [Pyrus x bretschneideri]
CmoCh01G018410	14	3	1.46	0.33	-2.05141	1.47395e-05	3.39452e-05	down	F14N23.10 [Arabidopsis thaliana]
CmoCh01G018470	8	2	1.39	0.37	-1.81162	0.00231579	0.00421803	down	PREDICTED: activating signal cointegrator 1 complex subunit 2 isoform X2 [Citrus sinensis]
CmoCh01G018500	50	3	4.58	0.29	-3.87828	7.72307e-32	5.22198e-31	down	PREDICTED: zinc finger protein ZAT10 [Cucumis sativus]// KGN55265.1 Zinc-finger protein 1 [Cucumis sativus]
CmoCh01G018540	105	9	9.93	0.9	-3.39905	9.70078e-58	1.03948e-56	down	ATP-dependent RNA helicase DDX18 [Gossypium arboreum]
CmoCh01G018620	2820	1031	84.61	32.41	-1.32351	0	0	down	PREDICTED: isoflavone 2'-hydroxylase-like [Cucumis melo]
CmoCh01G018690	227	99	11.26	5.16	-1.06824	2.52298e-28	1.56289e-27	down	PREDICTED: cyclin-D3-3-like [Cucumis melo]
CmoCh01G018850	86	20	3.59	0.88	-1.96989	1.5719e-26	9.26067e-26	down	PREDICTED: uncharacterized acetyltransferase At3g50280-like [Cucumis melo]
CmoCh01G018860	36.73	9	1.57	0.4	-1.89755	1.05398e-11	3.61739e-11	down	PREDICTED: uncharacterized acetyltransferase At3g50280-like [Cucumis melo]
CmoCh01G019180	69	14	75.02	17.78	-2.1636	1.66656e-24	9.25458e-24	down	hypothetical protein Csa_4G639110 [Cucumis sativus]
CmoCh01G019210	10	4	0.71	0.3	-1.17014	0.0195211	0.0309838	down	mRNA for AR781 family protein [Populus trichocarpa]// ERP52792.1 mRNA for AR781 family protein [Populus trichocarpa]
CmoCh01G019320	3	0	0.15	0.001	-4.58381	0.00390629	0.00682066	down	PREDICTED: pollen-specific leucine-rich repeat extensin-like protein 3 [Eucalyptus grandis]
CmoCh01G019390	40.13	15.02	1.45	0.57	-1.28025	1.11783e-07	3.02864e-07	down	PREDICTED: cytochrome P450 CYP82D47-like [Cucumis melo]
CmoCh01G019400	544.16	64.82	16.42	2.05	-2.93475	4.28138e-255	1.90622e-253	down	PREDICTED: cytochrome P450 CYP82D47-like [Cucumis melo]
CmoCh01G019630	15	0	0.67	0.001	-6.85679	1.13715e-13	4.30433e-13	down	DUF620 domain-containing protein [Cephalotus follicularis]
CmoCh01G019670	32	12	7.28	2.95	-1.27858	2.43175e-06	5.98919e-06	down	-
CmoCh01G019690	527.64	68.14	20.61	2.79	-2.82671	3.169e-238	1.31137e-236	down	Erythronate-4-phosphate dehydrogenase family protein isoform 1 [Theobroma cacao]// EOY14751.1 Erythronate-4-phosphate dehydrogenase family protein isoform 1 [Theobroma cacao]
CmoCh01G019780	127	26	16.23	3.53	-2.15507	1.93095e-43	1.64707e-42	down	PREDICTED: protein RADIALIS-like 3 [Sesamum indicum]
CmoCh01G019870	214.8	95.84	71.46	34.94	-1.03427	9.26804e-26	5.34255e-25	down	PREDICTED: 50S ribosomal protein L31, chloroplastic [Cucumis melo]// ADN34183.1 50S ribosomal protein l31 [Cucumis melo subsp. melo]
CmoCh01G019880	3	0	0.15	0.001	-4.58381	0.00390629	0.00682066	down	PREDICTED: jasmonate O-methyltransferase [Cucumis melo]
CmoCh01G020060	127	9	8.29	0.62	-3.67318	2.69202e-74	3.57035e-73	down	PREDICTED: B-box zinc finger protein 21-like isoform X1 [Cucumis melo]
CmoCh01G020090	2	0	8.79	0.001	-4.02862	0.0312501	0.0472645	down	-
CmoCh01G020390	722	229	11.1	3.68	-1.52812	2.37392e-149	5.97491e-148	down	PREDICTED: receptor protein kinase CLAVATA1 [Cucumis melo]
CmoCh01G020470	351	109	53.09	17.6	-1.55806	1.49587e-75	2.00809e-74	down	Lactoylglutathione lyase / glyoxalase I family protein [Theobroma cacao]
CmoCh01G020630	908	81	23.39	2.19	-3.35674	0	0	down	PREDICTED: probable serine/threonine-protein kinase At4g35230 [Cucumis melo]
CmoCh01G020770	104	27	3.83	1.04	-1.81295	1.03847e-28	6.50753e-28	down	PREDICTED: bromodomain-containing protein DDB_G0270170 isoform X2 [Ricinus communis]// EEF52873.1 bromodomain-containing protein [Ricinus communis]
CmoCh01G020920	384	102	12.67	3.53	-1.7833	1.44133e-99	2.47034e-98	down	PREDICTED: protein CUP-SHAPED COTYLEDON 3-like [Cucumis melo]// XP_016901299.1 PREDICTED: protein CUP-SHAPED COTYLEDON 3-like [Cucumis melo]// XP_016901300.1 PREDICTED: protein CUP-SHAPED COTYLEDON 3-like [Cucumis melo]
CmoCh01G021050	16	3	7.27	1.52	-2.24239	1.24566e-06	3.13634e-06	down	PREDICTED: calvin cycle protein CP12-3, chloroplastic-like [Ziziphus jujuba]// XP_015867005.1 PREDICTED: calvin cycle protein CP12-3, chloroplastic-like [Ziziphus jujuba]
CmoCh01G021100	21	8	3.11	1.26	-1.25183	0.000130402	0.000273132	down	DUF4228 domain-containing protein [Cephalotus follicularis]
CmoCh02G000140	48	17	3.89	1.46	-1.36327	7.93704e-10	2.45505e-09	down	PREDICTED: acyl-coenzyme A thioesterase 13 [Cucumis melo]
CmoCh02G000520	22.48	9.38	1.11	0.49	-1.15098	0.000365855	0.000731179	down	PREDICTED: heat stress transcription factor A-4c-like [Cucumis melo]
CmoCh02G000530	5253	1942	109.99	42.55	-1.3075	0	0	down	PREDICTED: acidic repeat-containing protein isoform X2 [Populus euphratica]
CmoCh02G000550	3	0	0.75	0.001	-4.58381	0.00390629	0.00682066	down	-
CmoCh02G000610	9	0	0.57	0.001	-6.1281	2.98049e-08	8.38956e-08	down	PREDICTED: E3 ubiquitin-protein ligase COP1-like isoform X2 [Malus domestica]
CmoCh02G000620	9	2	1.62	0.39	-1.97896	0.00053508	0.0010461	down	PREDICTED: E3 ubiquitin-protein ligase COP1 [Cucumis melo]
CmoCh02G000640	1200	477	52.17	21.78	-1.20273	1.35242e-181	4.18326e-180	down	1-amino-cyclopropane-1-carboxylic acid oxidase [Manihot esculenta]
CmoCh02G001400	51.14	1.11	2.08	0.05	-5.38527	7.71372e-39	6.03264e-38	down	PREDICTED: coumaroyl-CoA:anthocyanidin 3-O-glucoside-6''-O-coumaroyltransferase 2-like isoform X1 [Cucumis melo]
CmoCh02G001670	475	209	9.66	4.45	-1.05596	1.73844e-56	1.82242e-55	down	PREDICTED: homeobox-leucine zipper protein HDG2-like isoform X2 [Cucumis melo]
CmoCh02G001730	48	13	3.66	1.05	-1.7472	2.4985e-13	9.30398e-13	down	PREDICTED: high mobility group B protein 1-like isoform X2 [Cucumis melo]
CmoCh02G001800	2	0	0.12	0.001	-4.02862	0.0312501	0.0472645	down	PREDICTED: mitogen-activated protein kinase kinase kinase 2-like [Cucumis melo]
CmoCh02G002050	6	1	0.73	0.13	-2.32517	0.00257689	0.00466403	down	DUF679 domain-containing protein [Cephalotus follicularis]
CmoCh02G002230	146	59	7.09	3.01	-1.17751	1.25992e-21	6.42668e-21	down	PREDICTED: probable serine/threonine-protein kinase WNK11 isoform X1 [Cucumis melo]// XP_008464188.1 PREDICTED: probable serine/threonine-protein kinase WNK11 isoform X1 [Cucumis melo]
CmoCh02G002370	86	34	10.87	4.57	-1.20789	8.39379e-14	3.19741e-13	down	PREDICTED: nuclear transcription factor Y subunit B-3 [Nelumbo nucifera]
CmoCh02G002720	202	48	8.02	2	-1.94255	1.52306e-59	1.67969e-58	down	PREDICTED: hippocampus abundant transcript-like protein 1 [Populus euphratica]
CmoCh02G003140	415	188	14.4	6.84	-1.01387	1.55457e-46	1.4061e-45	down	auxin transporter-like protein 2 [Dorcoceras hygrometricum]
CmoCh02G003150	15	4	0.42	0.12	-1.7489	7.33407e-05	0.000157616	down	Arm domain-containing protein [Cephalotus follicularis]
CmoCh02G003240	53	10	2.81	0.56	-2.26437	1.1414e-19	5.44993e-19	down	PREDICTED: transcription factor bHLH121 [Jatropha curcas]// XP_012084380.1 PREDICTED: transcription factor bHLH121 [Jatropha curcas]// XP_012084381.1 PREDICTED: transcription factor bHLH121 [Jatropha curcas]
CmoCh02G003280	7	1	9.48	1.6	-2.54317	0.000488299	0.000958718	down	hypothetical protein Csa_2G263880 [Cucumis sativus]
CmoCh02G003440	2	0	2.17	0.001	-4.02862	0.0312501	0.0472645	down	PREDICTED: auxin-responsive protein SAUR21-like [Cucumis melo]
CmoCh02G003580	26	0	6.18	0.001	-7.64506	5.2978e-23	2.81596e-22	down	PREDICTED: auxin-responsive protein SAUR64 [Cucumis melo]
CmoCh02G003650	2520.31	920	118.36	45.4	-1.32556	0	0	down	PREDICTED: fructose-bisphosphate aldolase 1, chloroplastic [Capsicum annuum]
CmoCh02G003740	3.79	0	0.75	0.001	-4.98373	0.00048829	0.000958718	down	PREDICTED: kinesin-related protein 11-like [Cucumis melo]
CmoCh02G004030	12	2	1.61	0.29	-2.38884	1.50987e-05	3.47317e-05	down	PREDICTED: protein RADIALIS-like 2 [Cucumis melo]
CmoCh02G004120	62	7	2.63	0.31	-2.99742	2.23554e-31	1.49361e-30	down	PREDICTED: LOW QUALITY PROTEIN: BURP domain-containing protein BNM2A-like [Cucumis melo]
CmoCh02G004190	56	25	3.44	1.62	-1.03194	9.64776e-08	2.62376e-07	down	PREDICTED: plastid division protein PDV2 [Cucumis melo]
CmoCh02G004360	17	2	7.13	0.93	-2.88676	7.4569e-09	2.18235e-08	down	PREDICTED: salicylic acid-binding protein 2-like [Cucumis melo]
CmoCh02G004400	73	4	6.25	0.36	-4.02191	1.37558e-46	1.24625e-45	down	PREDICTED: zinc finger CCCH domain-containing protein 38 isoform X3 [Cucumis sativus]
CmoCh02G004410	71.11	1.08	3.2	0.05	-5.86156	9.80979e-56	1.01945e-54	down	PREDICTED: zinc finger CCCH domain-containing protein 38 isoform X2 [Cucumis melo]
CmoCh02G004490	49	5	3.18	0.34	-3.13452	9.55551e-26	5.50596e-25	down	calmodulin-binding protein [Medicago truncatula]// AES90217.1 calmodulin-binding protein [Medicago truncatula]
CmoCh02G004610	1058	324	68.98	22.26	-1.57888	2.11479e-250	9.22211e-249	down	PREDICTED: inositol-tetrakisphosphate 1-kinase 1-like [Cucumis melo]
CmoCh02G004620	226	69	12.19	3.91	-1.58195	3.26335e-50	3.12284e-49	down	PREDICTED: inositol-tetrakisphosphate 1-kinase 1-like [Cucumis melo]
CmoCh02G004760	5	0	150.76	0.001	-5.29651	6.10368e-05	0.00013234	down	PREDICTED: glycine-rich cell wall structural protein 1.8-like [Nelumbo nucifera]
CmoCh02G004970	239	12	9.97	0.53	-4.17436	2.95787e-152	7.61859e-151	down	PREDICTED: benzyl alcohol O-benzoyltransferase-like [Cucumis melo]
CmoCh02G005450	6	0	0.27	0.001	-5.55341	1.52593e-05	3.49815e-05	down	PREDICTED: E3 ubiquitin-protein ligase synoviolin B-like [Cucumis melo]
CmoCh02G005640	317	89	20.84	6.17	-1.70322	1.00123e-77	1.38663e-76	down	PREDICTED: probable calcium-binding protein CML32 [Cucumis melo]
CmoCh02G005740	8	0	0.32	0.001	-5.96075	2.38434e-07	6.31669e-07	down	PREDICTED: uncharacterized WD repeat-containing protein alr3466-like [Cucumis melo]
CmoCh02G005760	86	7	3.63	0.31	-3.46864	2.45065e-48	2.27867e-47	down	PREDICTED: B3 domain-containing transcription factor VRN1-like [Cucumis melo]
CmoCh02G005830	418	146	14.41	5.28	-1.38876	8.28819e-76	1.11698e-74	down	PREDICTED: patatin-like protein 2 isoform X1 [Cucumis melo]
CmoCh02G005910	138	58	6.76	2.99	-1.1209	4.22967e-19	1.98147e-18	down	PREDICTED: WAT1-related protein At5g64700-like [Cucumis melo]
CmoCh02G006210	13	2	1.85	0.3	-2.50312	3.12169e-06	7.60554e-06	down	PREDICTED: RING-H2 finger protein ATL78-like [Cucumis melo]
CmoCh02G006900	3	0	1.44	0.001	-4.58381	0.00390629	0.00682066	down	-
CmoCh02G007700	2	0	0.19	0.001	-4.02862	0.0312501	0.0472645	down	PREDICTED: proliferating cell nuclear antigen [Cucumis melo]
CmoCh02G007830	47	21	13.39	6.51	-1.03005	1.45701e-06	3.65114e-06	down	PREDICTED: ribulose bisphosphate carboxylase/oxygenase activase, chloroplastic-like isoform X4 [Cucumis sativus]
CmoCh02G007970	192	61	9.79	3.27	-1.52434	7.94826e-41	6.4694e-40	down	PREDICTED: expansin-A4 [Cucumis melo]
CmoCh02G008000	3	0	0.41	0.001	-4.58381	0.00390629	0.00682066	down	PREDICTED: pentatricopeptide repeat-containing protein At1g07590, mitochondrial isoform X2 [Cucumis sativus]
CmoCh02G008360	7	0	1.64	0.001	-5.77141	1.90744e-06	4.7317e-06	down	PREDICTED: RING-H2 finger protein ATL66-like [Cucumis melo]
CmoCh02G008570	6	1	1.96	0.36	-2.32517	0.00257689	0.00466403	down	-
CmoCh02G008660	102	13	8.32	1.12	-2.83259	1.3554e-47	1.24641e-46	down	PREDICTED: LOW QUALITY PROTEIN: dof zinc finger protein DOF5.3-like [Cucumis melo]
CmoCh02G008700	73	19	6.04	1.66	-1.80739	1.60266e-20	7.89864e-20	down	PREDICTED: LOB domain-containing protein 1-like [Cucumis melo]
CmoCh02G009310	488	118	14.92	3.78	-1.91898	3.24823e-139	7.62531e-138	down	Glutaredoxin domain-containing protein [Cephalotus follicularis]
CmoCh02G009360	7	1	0.36	0.05	-2.54317	0.000488299	0.000958718	down	PREDICTED: cytochrome b561 and DOMON domain-containing protein At3g61750-like [Cucumis melo]
CmoCh02G009490	156	41	14.37	4	-1.79682	9.70656e-42	8.031e-41	down	BnaA08g10720D [Brassica napus]
CmoCh02G009650	7	2	0.23	0.07	-1.62228	0.00935554	0.0155574	down	PREDICTED: alpha-L-fucosidase 1-like [Cucumis melo]
CmoCh02G009660	158	38	9.51	2.41	-1.92448	1.68679e-46	1.52369e-45	down	PREDICTED: B3 domain-containing transcription factor NGA1-like [Populus euphratica]
CmoCh02G009910	191	77	19.3	8.24	-1.18135	4.90029e-28	3.01254e-27	down	PREDICTED: ethylene-responsive transcription factor ERF105 [Cucumis melo]
CmoCh02G009970	1000	434	69.14	31.64	-1.07598	6.89474e-126	1.47875e-124	down	pterin-4-alpha-carbinolamine dehydratase [Medicago truncatula]// KEH41342.1 pterin-4-alpha-carbinolamine dehydratase [Medicago truncatula]
CmoCh02G010330	286	101	14.45	5.36	-1.37257	1.67116e-51	1.63092e-50	down	PREDICTED: secoisolariciresinol dehydrogenase [Cucumis melo]
CmoCh02G010360	16	4	0.74	0.2	-1.84123	1.91705e-05	4.35926e-05	down	gibberellin 20-oxidase [Cucurbita maxima]
CmoCh02G010400	113	0	5.34	0.001	-9.75924	5.06378e-95	8.35675e-94	down	DUF4378 domain-containing protein/VARLMGL domain-containing protein [Cephalotus follicularis]
CmoCh02G010590	2	0	23.86	0.001	-4.02862	0.0312501	0.0472645	down	-
CmoCh02G010820	2.02	0	0.25	0.001	-4.02862	0.0312501	0.0472645	down	PREDICTED: myosin-11 isoform X1 [Cucumis melo]
CmoCh02G010970	140	50	4.74	1.77	-1.35529	9.76579e-26	5.62595e-25	down	PREDICTED: probable polygalacturonase [Cucumis melo]
CmoCh02G011020	4	0	0.27	0.001	-4.98373	0.00048829	0.000958718	down	WRKY transcription factor [Cucumis melo subsp. melo]
CmoCh02G011100	761	257	22.03	7.79	-1.43766	4.75632e-144	1.16004e-142	down	PREDICTED: S-type anion channel SLAH2 [Cucumis melo]
CmoCh02G011120	34	8	2.15	0.53	-1.94357	5.02669e-11	1.67011e-10	down	PREDICTED: probable membrane-associated kinase regulator 6 [Fragaria vesca subsp. vesca]
CmoCh02G011250	16	0	1.35	0.001	-6.94912	2.84294e-14	1.10572e-13	down	PREDICTED: ethylene-responsive transcription factor CRF1-like [Cucumis melo]
CmoCh02G011270	33	6	10.33	2.05	-2.30864	4.25193e-13	1.56599e-12	down	PREDICTED: transcription factor TRY [Cucumis melo]
CmoCh02G011360	148.88	64	2.58	1.16	-1.0897	1.07758e-19	5.15503e-19	down	-
CmoCh02G011710	6	0	46.93	0.001	-5.55341	1.52593e-05	3.49815e-05	down	-
CmoCh02G011900	10.9	0	0.31	0.001	-6.41385	4.65722e-10	1.46204e-09	down	PREDICTED: L-ascorbate oxidase homolog [Cucumis sativus]
CmoCh02G012440	71	18	11.13	3.02	-1.84489	2.02385e-20	9.94858e-20	down	PREDICTED: dirigent protein 22-like [Cucumis melo]
CmoCh02G012500	3037	1138	162.87	64.19	-1.28802	0	0	down	peroxidase 2-like precursor [Cucumis sativus]// AAA33127.1 peroxidase [Cucumis sativus]
CmoCh02G012600	3027.43	771.79	56.09	14.96	-1.84301	0	0	down	linoleate 13S-lipoxygenase 2-1, chloroplastic-like [Cucumis melo]// AME15769.1 lipoxygenase 13 [Cucumis melo var. makuwa]
CmoCh02G012640	1235.57	354.21	34.06	10.23	-1.67548	2.22329540628561e-321	1.26599381090361e-319	down	linoleate 13S-lipoxygenase 2-1, chloroplastic-like [Cucumis melo]// AME15769.1 lipoxygenase 13 [Cucumis melo var. makuwa]
CmoCh02G012660	669	245	12.37	4.74	-1.32076	9.20118e-112	1.75007e-110	down	PREDICTED: linoleate 13S-lipoxygenase 2-1, chloroplastic-like [Cucumis sativus]
CmoCh02G012790	50	13	2.39	0.65	-1.80594	1.80894e-14	7.10582e-14	down	PREDICTED: zinc finger protein WIP2 [Vitis vinifera]
CmoCh02G012820	37	15	0.77	0.33	-1.16816	2.43784e-06	6.0015e-06	down	Foot protein 1 variant 1 [Symbiodinium microadriaticum]
CmoCh02G012920	5	0	3.61	0.001	-5.29651	6.10368e-05	0.00013234	down	BnaCnng57370D [Brassica napus]
CmoCh02G013220	849	330	17.91	7.29	-1.23496	7.47109e-135	1.70168e-133	down	PREDICTED: calcium-dependent protein kinase 34 [Cucumis melo]
CmoCh02G013520	98	22	70.82	18.14	-2.02134	2.71694e-31	1.81173e-30	down	BnaA05g27460D [Brassica napus]
CmoCh02G013530	21	9	0.57	0.26	-1.08427	0.000972893	0.00184599	down	PREDICTED: probable DNA double-strand break repair Rad50 ATPase isoform X1 [Gossypium hirsutum]
CmoCh02G013570	1587	490	148.52	48.53	-1.56717	0	0	down	Bile acid-inducible operon CD [Gossypium arboreum]
CmoCh02G013600	2	0	15.64	0.001	-4.02862	0.0312501	0.0472645	down	-
CmoCh02G014200	20	1	1.39	0.07	-4.04047	2.59273e-13	9.64705e-13	down	PREDICTED: transcription factor RAX1-like [Cucumis sativus]
CmoCh02G014390	15	4	1.79	0.51	-1.7489	7.33407e-05	0.000157616	down	-
CmoCh02G014650	23	4	0.45	0.08	-2.36123	6.41757e-10	1.99603e-09	down	PREDICTED: LOW QUALITY PROTEIN: homeobox protein BEL1 homolog [Cucumis melo]
CmoCh02G014660	674.88	307.56	34.53	16.55	-1.00364	3.74159e-76	5.07971e-75	down	PREDICTED: phosphoglycerate mutase-like protein AT74H [Cucumis melo]
CmoCh02G015050	7	1	0.45	0.07	-2.54317	0.000488299	0.000958718	down	PREDICTED: protein LURP-one-related 4-like [Cucumis sativus]
CmoCh02G015070	146	42	10.11	3.07	-1.66666	2.28135e-35	1.66952e-34	down	PREDICTED: remorin isoform X1 [Cucumis melo]
CmoCh02G015250	25	3	1.14	0.14	-2.88203	1.02297e-12	3.69744e-12	down	UAA transporter [Corchorus capsularis]
CmoCh02G015460	1350	474	31.3	11.5	-1.38174	1.10639e-256	4.95809e-255	down	PREDICTED: IRK-interacting protein [Cucumis melo]
CmoCh02G015510	91	35	4.04	1.63	-1.24762	2.40073e-15	9.75154e-15	down	PREDICTED: AT-hook motif nuclear-localized protein 1 [Cucumis melo]
CmoCh02G015530	21	5	0.82	0.21	-1.91723	2.41827e-07	6.40225e-07	down	PREDICTED: protein DETOXIFICATION 56 [Cucumis melo]
CmoCh02G015580	146	57	15.32	6.34	-1.22716	3.82756e-23	2.04235e-22	down	PREDICTED: protein LITTLE ZIPPER 1-like isoform X1 [Juglans regia]
CmoCh02G015640	12.87	2.39	0.96	0.19	-2.50312	3.12169e-06	7.60554e-06	down	UBN2 domain-containing protein [Cephalotus follicularis]
CmoCh02G015800	8	0	0.39	0.001	-5.96075	2.38434e-07	6.31669e-07	down	PREDICTED: metalloendoproteinase 1-MMP [Cucumis melo]
CmoCh02G015970	473	54	33.39	4.02	-2.99998	7.18524e-227	2.78125e-225	down	PREDICTED: axial regulator YABBY 5-like [Cucumis sativus]// KGN50218.1 Axial regulator YABBY1 [Cucumis sativus]
CmoCh02G016400	320	125	7.46	3.05	-1.22731	1.62492e-48	1.51498e-47	down	PREDICTED: protein NRT1/ PTR FAMILY 7.3-like [Cucumis melo]
CmoCh02G016540	38	3	2.7	0.22	-3.48354	1.91982e-22	1.00057e-21	down	BnaA02g24680D [Brassica napus]
CmoCh02G016600	2	0	1.57	0.001	-4.02862	0.0312501	0.0472645	down	-
CmoCh02G016610	410	65	32.36	5.42	-2.52688	3.18431e-164	8.78475e-163	down	PREDICTED: protein TORNADO 2 [Cucumis melo]
CmoCh02G016640	22	10	1.6	0.77	-1.00087	0.0019246	0.00353797	down	PREDICTED: RING-H2 finger protein ATL29 [Cucumis sativus]// KGN60372.1 RING-H2 finger protein ATL29 [Cucumis sativus]
CmoCh02G016730	577	251	9.25	4.21	-1.07248	4.35022e-70	5.49712e-69	down	PREDICTED: homeobox-leucine zipper protein HDG5 [Cucumis melo]// XP_008466008.1 PREDICTED: homeobox-leucine zipper protein HDG5 [Cucumis melo]
CmoCh02G016740	2	0	26.63	0.001	-4.02862	0.0312501	0.0472645	down	-
CmoCh02G016750	18	6	0.85	0.3	-1.43891	0.000112285	0.000236968	down	PREDICTED: lysine-specific demethylase JMJ706 [Cucumis sativus]// XP_011652638.1 PREDICTED: lysine-specific demethylase JMJ706 [Cucumis sativus]
CmoCh02G016900	2020	841	70.18	30.64	-1.13602	2.65278e-276	1.28264e-274	down	PREDICTED: phosphoribulokinase, chloroplastic-like [Cucumis melo]
CmoCh02G017030	704	319	15.3	7.26	-1.0137	1.08083e-80	1.54181e-79	down	PREDICTED: probable polyamine transporter At1g31830 isoform X2 [Cucumis sativus]
CmoCh02G017240	5.47	0	0.46	0.001	-5.29651	6.10368e-05	0.00013234	down	PREDICTED: LOW QUALITY PROTEIN: E3 ubiquitin-protein ligase cblA-like [Cucumis melo]
CmoCh02G017310	76	28	17.28	6.87	-1.30887	5.92362e-14	2.26932e-13	down	hypothetical protein Csa_3G626150 [Cucumis sativus]
CmoCh02G017410	44	12	8.03	2.35	-1.73641	4.48289e-12	1.56748e-11	down	PREDICTED: protein LATE FLOWERING-like [Cucumis melo]
CmoCh02G017500	4	0	0.16	0.001	-4.98373	0.00048829	0.000958718	down	probable indole-3-pyruvate monooxygenase YUCCA9 [Cucumis melo]// AJO67751.1 YUCCA type protein 5 [Cucumis melo]
CmoCh02G017640	19	0	0.64	0.001	-7.19521	5.55327e-17	2.40907e-16	down	PREDICTED: homeobox-leucine zipper protein HDG2-like [Cucumis melo]
CmoCh02G017800	54	24	0.72	0.34	-1.0382	1.63339e-07	4.37604e-07	down	PREDICTED: protein CHROMATIN REMODELING 8 isoform X1 [Cucumis sativus]// XP_011651434.1 PREDICTED: protein CHROMATIN REMODELING 8 isoform X1 [Cucumis sativus]// XP_011651435.1 PREDICTED: protein CHROMATIN REMODELING 8 isoform X1 [Cucumis sativus]
CmoCh02G017850	83	23	5.13	1.5	-1.71823	1.32804e-21	6.77038e-21	down	PREDICTED: protein LIGHT-DEPENDENT SHORT HYPOCOTYLS 3-like [Cucumis melo]
CmoCh02G017950	2	0	0.21	0.001	-4.02862	0.0312501	0.0472645	down	PREDICTED: ethylene-responsive transcription factor 1B-like [Cucumis melo]
CmoCh02G017970	40	11	2.36	0.68	-1.72357	2.44635e-11	8.24224e-11	down	PREDICTED: RING-H2 finger protein ATL16-like [Ziziphus jujuba]
CmoCh02G018090	49	7	3.32	0.5	-2.65874	3.96696e-22	2.04928e-21	down	PREDICTED: myosin-binding protein 1-like isoform X2 [Cucumis sativus]
CmoCh02G018100	118	24	2.35	0.5	-2.16407	1.68748e-40	1.36344e-39	down	PREDICTED: myosin-binding protein 1-like [Cucumis melo]// XP_016900699.1 PREDICTED: myosin-binding protein 1-like [Cucumis melo]// XP_016900700.1 PREDICTED: myosin-binding protein 1-like [Cucumis melo]// XP_016900701.1 PREDICTED: myosin-binding protein 1-like [Cucumis melo]// XP_016900702.1 PREDICTED: myosin-binding protein 1-like [Cucumis melo]
CmoCh02G018200	201	83	6.34	2.74	-1.14683	5.14821e-28	3.16354e-27	down	DUF506 domain-containing protein [Cephalotus follicularis]
CmoCh02G018370	11	4	77.77	35.77	-1.30596	0.00660914	0.0111994	down	-
CmoCh02G018490	343	28	8.09	0.69	-3.48108	9.47222e-190	3.06762e-188	down	PREDICTED: basic helix-loop-helix protein A isoform X1 [Cucumis sativus]
CmoCh02G018500	13	3	4.24	1.07	-1.94552	6.17027e-05	0.000133721	down	PREDICTED: antifungal protein ginkbilobin-2-like [Prunus mume]
CmoCh03G000420	10	2	0.57	0.12	-2.1289	0.00011685	0.000246169	down	PREDICTED: probable calcium-binding protein CML49 [Cucumis sativus]// KGN54506.1 Ef-hand calcium binding protein [Cucumis sativus]
CmoCh03G000530	62	17	3.13	0.9	-1.73162	1.66497e-16	7.08781e-16	down	PREDICTED: LOW QUALITY PROTEIN: EGF domain-specific O-linked N-acetylglucosamine transferase-like [Cucumis melo]
CmoCh03G000560	2	0	0.11	0.001	-4.02862	0.0312501	0.0472645	down	PREDICTED: heat stress transcription factor B-3 [Cucumis sativus]
CmoCh03G000640	16	7	0.83	0.38	-1.05191	0.00490376	0.00845412	down	F17A17.37 protein [Theobroma cacao]
CmoCh03G000740	2	0	2.17	0.001	-4.02862	0.0312501	0.0472645	down	PREDICTED: glycine-rich cell wall structural protein 1-like [Pyrus x bretschneideri]
CmoCh03G001250	36	16	4.18	1.97	-1.03637	2.49582e-05	5.616e-05	down	PREDICTED: E3 ubiquitin-protein ligase synoviolin B-like [Cucumis melo]
CmoCh03G001290	64	27	1.91	0.85	-1.11364	1.75387e-09	5.31931e-09	down	PREDICTED: fatty acyl-CoA reductase 2 isoform X1 [Cucumis melo]
CmoCh03G001600	28	0	1.13	0.001	-7.75146	8.27883e-25	4.63843e-24	down	PREDICTED: phosphatidylinositol 4-phosphate 5-kinase 5-like [Cucumis melo]
CmoCh03G001610	11	0	1.2	0.001	-6.41385	4.65722e-10	1.46204e-09	down	phosphatidylinositol 4-phosphate 5-kinase 6-like isoform X3 [Ananas comosus]
CmoCh03G001680	45	4	2.45	0.23	-3.32554	9.89221e-25	5.5345e-24	down	glutaredoxin family protein [Populus trichocarpa]// EEE92422.2 glutaredoxin family protein [Populus trichocarpa]
CmoCh03G001710	81	0	6.96	0.001	-9.27957	4.32314e-69	5.40588e-68	down	embryo-abundant family protein [Populus trichocarpa]// EEE92424.1 embryo-abundant family protein [Populus trichocarpa]
CmoCh03G001750	73	19	10.13	2.81	-1.80739	1.60266e-20	7.89864e-20	down	PREDICTED: UPF0481 protein At3g47200-like [Cucumis melo]
CmoCh03G001760	55	13	3.13	0.78	-1.9431	3.22475e-17	1.41272e-16	down	PREDICTED: UPF0481 protein At3g47200-like [Cucumis melo]
CmoCh03G001860	448	70	16.33	2.68	-2.54799	3.33199e-181	1.02718e-179	down	BTB domain-containing protein/DUF3420 domain-containing protein/Ank_2 domain-containing protein [Cephalotus follicularis]
CmoCh03G001870	54	24	1.58	0.73	-1.0382	1.63339e-07	4.37604e-07	down	PREDICTED: pentatricopeptide repeat-containing protein At4g35130, chloroplastic [Cucumis melo]// XP_008457593.1 PREDICTED: pentatricopeptide repeat-containing protein At4g35130, chloroplastic [Cucumis melo]// XP_016902177.1 PREDICTED: pentatricopeptide repeat-containing protein At4g35130, chloroplastic [Cucumis melo]// XP_016902178.1 PREDICTED: pentatricopeptide repeat-containing protein At4g3513…
CmoCh03G002180	2	0	0.12	0.001	-4.02862	0.0312501	0.0472645	down	DNA/RNA polymerases superfamily protein [Theobroma cacao]
CmoCh03G002510	14	3	1.64	0.37	-2.05141	1.47395e-05	3.39452e-05	down	PREDICTED: ethylene-responsive transcription factor RAP2-11-like [Cucumis sativus]
CmoCh03G002530	3354.64	179	125.47	7.02	-4.09933	0	0	down	PREDICTED: spermidine hydroxycinnamoyl transferase-like [Cucumis melo]
CmoCh03G003080	19	5	0.41	0.11	-1.77377	3.75398e-06	9.07939e-06	down	PREDICTED: probable serine/threonine-protein kinase WNK5 isoform X2 [Cucumis melo]
CmoCh03G003090	12	4	0.58	0.2	-1.43008	0.00208824	0.00382252	down	BnaC04g06780D [Brassica napus]
CmoCh03G003140	2	0	0.06	0.001	-4.02862	0.0312501	0.0472645	down	PREDICTED: adenine/guanine permease AZG1 [Prunus mume]
CmoCh03G003400	30	3	3.95	0.42	-3.14382	1.78913e-16	7.60931e-16	down	PREDICTED: abscisic acid receptor PYL4 [Cucumis melo]
CmoCh03G003420	29	6	1.4	0.31	-2.12302	6.21104e-11	2.04977e-10	down	PREDICTED: mitoferrin-like [Cucumis melo]
CmoCh03G003630	2	0	1.02	0.001	-4.02862	0.0312501	0.0472645	down	-
CmoCh03G003750	2550	911	317.19	120.49	-1.35682	0	0	down	PREDICTED: chlorophyll a-b binding protein CP29.1, chloroplastic-like [Cucumis melo]
CmoCh03G003820	42	12	1.85	0.56	-1.6695	2.75094e-11	9.24358e-11	down	PREDICTED: mitogen-activated protein kinase-binding protein 1 isoform X1 [Cucumis sativus]
CmoCh03G003940	95	22	6.16	1.5	-1.97655	1.83815e-29	1.17403e-28	down	PREDICTED: probable glutathione S-transferase [Cucumis melo]
CmoCh03G003950	12	1	1	0.09	-3.30973	6.67875e-08	1.83717e-07	down	PREDICTED: probable glutathione S-transferase [Cucumis melo]
CmoCh03G004140	16	6	1.44	0.57	-1.27028	0.00109019	0.00205623	down	PREDICTED: protein MIZU-KUSSEI 1 [Cucumis melo]
CmoCh03G004210	2	0	0.16	0.001	-4.02862	0.0312501	0.0472645	down	PREDICTED: diacylglycerol kinase theta-like [Vitis vinifera]
CmoCh03G004290	13	0	1.03	0.001	-6.65225	7.2773e-12	2.5171e-11	down	protein FAR-RED ELONGATED HYPOCOTYL 1-like isoform X1 [Cajanus cajan]// XP_020206924.1 protein FAR-RED ELONGATED HYPOCOTYL 1-like isoform X1 [Cajanus cajan]
CmoCh03G004300	4	0	23.24	0.001	-4.98373	0.00048829	0.000958718	down	PREDICTED: cyclin-dependent protein kinase inhibitor SMR2 [Nelumbo nucifera]
CmoCh03G004430	98	33	5.65	2	-1.43898	5.57833e-20	2.69622e-19	down	PREDICTED: dof zinc finger protein DOF5.1-like [Cucumis melo]
CmoCh03G004820	4.04	0	0.24	0.001	-4.98373	0.00048829	0.000958718	down	PREDICTED: DNA topoisomerase 6 subunit A [Cucumis melo]
CmoCh03G005000	11	3	2.61	0.77	-1.70712	0.000940733	0.0017873	down	hypothetical protein Csa_6G516990 [Cucumis sativus]
CmoCh03G005180	2	0	0.12	0.001	-4.02862	0.0312501	0.0472645	down	PREDICTED: myb-related protein 315-like [Cucumis sativus]
CmoCh03G005230	19	3	6.89	1.2	-2.48847	1.17567e-08	3.40101e-08	down	PREDICTED: zinc finger protein CONSTANS-LIKE 2-like [Cucumis sativus]
CmoCh03G005270	4	0	0.75	0.001	-4.98373	0.00048829	0.000958718	down	-
CmoCh03G005280	278	92	25.02	8.76	-1.46614	3.00098e-55	3.09532e-54	down	PREDICTED: NAD(P)H dehydrogenase (quinone) FQR1-like [Cucumis melo]
CmoCh03G005340	40	11	0.76	0.22	-1.72357	2.44635e-11	8.24224e-11	down	PREDICTED: cysteine-rich receptor-like protein kinase 29 [Cucumis melo]
CmoCh03G005400	3.94	0	0.14	0.001	-4.98373	0.00048829	0.000958718	down	Retrovirus-related Pol polyprotein from transposon TNT 1-94, partial [Noccaea caerulescens]
CmoCh03G005420	294.76	134	6.42	3.06	-1.00979	3.16448e-33	2.21016e-32	down	PREDICTED: cysteine-rich receptor-like protein kinase 10 [Cucumis sativus]
CmoCh03G005530	7	2	2.54	0.8	-1.62228	0.00935554	0.0155574	down	PREDICTED: uncharacterized protein LOC105436036 [Cucumis sativus]// KGN49122.1 hypothetical protein Csa_6G514830 [Cucumis sativus]
CmoCh03G005620	1360.99	592.36	28.47	12.97	-1.0728	9.64968e-170	2.77895e-168	down	PREDICTED: ankyrin repeat domain-containing protein 13C [Cucumis melo]
CmoCh03G005730	21	9	0.53	0.24	-1.08427	0.000972893	0.00184599	down	WRKY transcription factor 2-like protein [Luffa aegyptiaca]
CmoCh03G005870	41	7	4.9	0.89	-2.40233	8.28702e-17	3.57251e-16	down	PREDICTED: death-associated inhibitor of apoptosis 1-like [Ziziphus jujuba]
CmoCh03G005930	31	6	4.05	0.83	-2.21881	3.1005e-12	1.09187e-11	down	BnaA08g24990D [Brassica napus]
CmoCh03G006730	21	9	2.61	1.19	-1.08427	0.000972893	0.00184599	down	PREDICTED: thiosulfate sulfurtransferase 16, chloroplastic [Cucumis melo]
CmoCh03G006860	114	52	3.89	1.86	-1.00275	1.34897e-13	5.08725e-13	down	PREDICTED: aspartyl protease family protein 1-like [Cucumis melo]
CmoCh03G006890	2	0	2.56	0.001	-4.02862	0.0312501	0.0472645	down	PREDICTED: methyltransferase-like protein 23 isoform X3 [Cucumis melo]
CmoCh03G007270	567	168	8.45	2.62	-1.62615	9.57879e-129	2.09185e-127	down	PREDICTED: probable LRR receptor-like serine/threonine-protein kinase At4g36180 [Cucumis melo]
CmoCh03G007310	632.32	96.37	9.41	1.5	-2.58928	4.13397e-259	1.86164e-257	down	-
CmoCh03G007320	48.68	16.63	0.96	0.34	-1.39294	2.59211e-10	8.26644e-10	down	PREDICTED: probable methyltransferase PMT27 [Cucumis melo]
CmoCh03G007390	2	0	1.34	0.001	-4.02862	0.0312501	0.0472645	down	-
CmoCh03G007450	232	95	21.2	9.19	-1.15908	9.70222e-33	6.69822e-32	down	PREDICTED: bZIP transcription factor 53-like [Cucumis melo]
CmoCh03G007460	27	4	1.34	0.21	-2.59135	1.84877e-12	6.59148e-12	down	PREDICTED: transcription factor bHLH110-like isoform X1 [Cucumis melo]
CmoCh03G007570	88	2	4.93	0.12	-5.24983	7.15764e-65	8.42291e-64	down	PREDICTED: salicylate carboxymethyltransferase-like [Cucumis melo]
CmoCh03G007610	3	0	0.22	0.001	-4.58381	0.00390629	0.00682066	down	PREDICTED: salicylate carboxymethyltransferase-like [Cucumis melo]
CmoCh03G007710	179.08	8.22	2.89	0.14	-4.33544	3.35502e-117	6.71003e-116	down	-
CmoCh03G008050	25	4	1	0.17	-2.48087	4.63066e-11	1.54132e-10	down	PREDICTED: UDP-glycosyltransferase 72E1 [Cucumis melo]
CmoCh03G008130	519	122	8.52	2.09	-1.95976	3.30792e-152	8.51227e-151	down	PREDICTED: cytochrome P450 CYP736A12-like [Cucumis melo]
CmoCh03G008150	4	0	0.15	0.001	-4.98373	0.00048829	0.000958718	down	PREDICTED: cytochrome P450 CYP736A12-like [Cucumis melo]
CmoCh03G008310	26	8	0.8	0.26	-1.55824	1.11585e-06	2.81928e-06	down	PREDICTED: L-ascorbate oxidase [Cucumis melo]
CmoCh03G008340	2	0	0.08	0.001	-4.02862	0.0312501	0.0472645	down	PREDICTED: type I inositol polyphosphate 5-phosphatase 5-like [Cucumis melo]
CmoCh03G008360	391	19	23.99	1.23	-4.2265	3.01145e-250	1.31115e-248	down	PREDICTED: ethylene-responsive transcription factor ERF060 [Cucumis melo]
CmoCh03G008550	5.23	0	0.25	0.001	-5.29651	6.10368e-05	0.00013234	down	PREDICTED: 7-deoxyloganetin glucosyltransferase-like isoform X1 [Cucumis sativus]
CmoCh03G008570	50	18	9.02	3.48	-1.34011	7.16441e-10	2.2228e-09	down	PREDICTED: EPIDERMAL PATTERNING FACTOR-like protein 1 [Cucumis melo]
CmoCh03G008850	2	0	15.64	0.001	-4.02862	0.0312501	0.0472645	down	-
CmoCh03G008900	65	10	2.84	0.46	-2.55816	1.55284e-27	9.43688e-27	down	PREDICTED: 8-hydroxygeraniol dehydrogenase-like [Cucumis melo]
CmoCh03G008950	209	79	7.74	3.07	-1.27426	2.52353e-34	1.80598e-33	down	PREDICTED: transcription factor bHLH93 isoform X1 [Cucumis melo]// XP_016899308.1 PREDICTED: transcription factor bHLH93 isoform X1 [Cucumis melo]
CmoCh03G008980	429	193	10	4.71	-1.02388	9.88568e-49	9.25125e-48	down	Zinc finger C3HC4-type RING finger family protein [Citrus limon]
CmoCh03G009020	11	0	0.3	0.001	-6.41385	4.65722e-10	1.46204e-09	down	PREDICTED: phosphoenolpyruvate carboxykinase [ATP]-like [Cucumis melo]
CmoCh03G009140	3	0	0.16	0.001	-4.58381	0.00390629	0.00682066	down	Protein SZT2 [Anthurium amnicola]
CmoCh03G009340	4564	1550	90.58	32.19	-1.42992	0	0	down	PREDICTED: AP2-like ethylene-responsive transcription factor ANT isoform X1 [Cucumis sativus]
CmoCh03G009390	21	6	2.57	0.78	-1.65981	2.7325e-06	6.69342e-06	down	Ocs element-binding factor 1 [Morus notabilis]// EXC12620.1 Ocs element-binding factor 1 [Morus notabilis]
CmoCh03G009410	1014	62	50.19	3.23	-3.90101	0	0	down	PREDICTED: protein PHLOEM PROTEIN 2-LIKE A10-like [Cucumis melo]
CmoCh03G009430	123	53	5.37	2.43	-1.08483	2.0147e-16	8.55549e-16	down	PREDICTED: ACT domain-containing protein ACR1 [Cucumis melo]
CmoCh03G009540	424	104	11.96	3.07	-1.89823	1.96638e-119	4.01136e-118	down	PREDICTED: BTB/POZ domain-containing protein At3g49900 [Cucumis melo]
CmoCh03G009630	12	4	7.46	2.81	-1.43008	0.00208824	0.00382252	down	PREDICTED: formamidase-like isoform X2 [Cucumis melo]
CmoCh03G009740	8	1	0.21	0.03	-2.73251	8.79809e-05	0.000187486	down	PREDICTED: cytochrome P450 81E8 [Cucumis melo]
CmoCh03G009800	8646	209	269.59	6.83	-5.24161	0	0	down	PREDICTED: cysteine proteinase COT44-like [Cucumis melo]
CmoCh03G010010	21	8	0.79	0.32	-1.25183	0.000130402	0.000273132	down	PREDICTED: peroxidase 10 [Cucumis melo]
CmoCh03G010050	455	190	10.75	4.7	-1.13133	1.7164e-60	1.91514e-59	down	PREDICTED: probable transcription factor KAN4 [Fragaria vesca subsp. vesca]
CmoCh03G010750	1070	0	84.74	0.001	-13.001	0	0	down	PREDICTED: transcription factor HEC3-like [Cucumis melo]
CmoCh03G010810	1688	424	40.07	10.54	-1.86484	0	0	down	PREDICTED: BTB/POZ domain-containing protein At2g13690 [Cucumis melo]
CmoCh03G010830	240	99	22.24	9.71	-1.14854	1.78784e-33	1.25568e-32	down	PREDICTED: NAD(P)H-quinone oxidoreductase subunit O, chloroplastic [Cucumis melo]
CmoCh03G010890	14	1	0.49	0.04	-3.5299	1.61863e-09	4.92215e-09	down	PREDICTED: phosphatidylinositol 4-kinase gamma 8 [Cucumis melo]
CmoCh03G010990	144	25	6.23	1.14	-2.39246	4.93319e-55	5.0693e-54	down	PREDICTED: gibberellin 20 oxidase 2-like [Cucumis melo]
CmoCh03G011060	3	0	0.55	0.001	-4.58381	0.00390629	0.00682066	down	PREDICTED: RING-H2 finger protein ATL70-like [Cucumis melo]
CmoCh03G011330	26	8	4.97	1.64	-1.55824	1.11585e-06	2.81928e-06	down	-
CmoCh03G011540	5	0	6.05	0.001	-5.29651	6.10368e-05	0.00013234	down	-
CmoCh03G011690	91	24	3.21	0.89	-1.7897	6.44118e-25	3.61988e-24	down	PREDICTED: histone-lysine N-methyltransferase SETD1B-like [Pyrus x bretschneideri]
CmoCh03G012160	5	0	2.8	0.001	-5.29651	6.10368e-05	0.00013234	down	DVL family protein [Medicago truncatula]// AES81892.1 DVL family protein [Medicago truncatula]
CmoCh03G012270	30.4	11.67	0.77	0.31	-1.18586	1.38674e-05	3.20196e-05	down	PREDICTED: phenylalanine ammonia-lyase-like [Cucumis melo]
CmoCh03G012290	133.81	41.63	3.35	1.09	-1.54304	1.77316e-29	1.13304e-28	down	PREDICTED: phenylalanine ammonia-lyase-like [Cucumis melo]
CmoCh03G012320	55	25	5.41	2.6	-1.00601	2.36886e-07	6.28292e-07	down	-
CmoCh03G012390	21	4	1.06	0.21	-2.23076	1.39406e-08	4.01131e-08	down	PREDICTED: aquaporin PIP2-2-like [Cucumis melo]
CmoCh03G012650	79.71	21.62	55.39	17.1	-1.72899	6.45508e-21	3.22695e-20	down	-
CmoCh03G012750	4406	1841	256.56	112.83	-1.13089	0	0	down	PREDICTED: auxin-repressed 12.5 kDa protein [Nelumbo nucifera]
CmoCh03G012770	558	178	53.61	18.11	-1.51972	6.32171e-115	1.22954e-113	down	ethylene-responsive transcription factor 4-like [Cucumis sativus]// AAV66332.1 ethylene response factor 1 [Cucumis sativus]// KGN49247.1 Ethylene response factor 1 [Cucumis sativus]
CmoCh03G012890	4	0	0.25	0.001	-4.98373	0.00048829	0.000958718	down	PREDICTED: PTI1-like tyrosine-protein kinase At3g15890 [Cucumis melo]
CmoCh03G013010	1564	0	94.48	0.001	-13.5485	0	0	down	PREDICTED: WUSCHEL-related homeobox 9-like isoform X1 [Cucumis melo]
CmoCh03G013040	501	9	26.42	0.5	-5.65205	0	0	down	PREDICTED: GDSL esterase/lipase At5g45960 [Cucumis melo]
CmoCh03G013090	174	47	8.32	2.36	-1.75773	4.26812e-45	3.76294e-44	down	PREDICTED: spermidine coumaroyl-CoA acyltransferase [Cucumis melo]
CmoCh03G013100	25	9	0.48	0.18	-1.33438	2.2375e-05	5.05083e-05	down	BnaA03g58330D [Brassica napus]
CmoCh03G013120	472.14	178	10.72	4.23	-1.2783	1.80932e-75	2.42415e-74	down	PREDICTED: pyruvate decarboxylase 1-like [Cucumis sativus]// KGN49289.1 Pyruvate decarboxylase [Cucumis sativus]
CmoCh03G013130	8.86	0	0.28	0.001	-6.1281	2.98049e-08	8.38956e-08	down	PREDICTED: GDSL esterase/lipase At1g28570-like [Cucumis melo]
CmoCh03G013180	33	15	7.54	3.7	-1.00371	0.000104978	0.000222041	down	PREDICTED: 50S ribosomal protein L34, chloroplastic [Cucumis melo]
CmoCh03G013210	78.87	29.31	3.4	1.33	-1.31421	1.80012e-14	7.07216e-14	down	PREDICTED: U-box domain-containing protein 7 [Cucumis melo]
CmoCh03G013360	7	0	13.88	0.001	-5.77141	1.90744e-06	4.7317e-06	down	-
CmoCh03G013530	1142	37	46.14	1.57	-4.81537	0	0	down	PREDICTED: GDSL esterase/lipase At1g29670-like [Cucumis melo]
CmoCh03G013600	35	14	2.23	0.94	-1.187	4.10858e-06	9.89276e-06	down	hypothetical protein Csa_6G521060 [Cucumis sativus]
CmoCh03G013780	3	0	0.77	0.001	-4.58381	0.00390629	0.00682066	down	hypothetical protein Csa_6G522750 [Cucumis sativus]
CmoCh03G013790	1443	574	50.92	21.24	-1.20174	1.26391e-217	4.72639e-216	down	DUF561 domain-containing protein [Cephalotus follicularis]
CmoCh03G014000	135	50	20.16	7.97	-1.30287	2.11652e-23	1.13773e-22	down	PREDICTED: protein TIFY 5A [Cucumis melo]
CmoCh03G014570	17	4	0.61	0.15	-1.928	4.81833e-06	1.15352e-05	down	PREDICTED: flavin-dependent oxidoreductase FOX2-like [Cucumis melo]
CmoCh03G014760	347	140	10.97	4.64	-1.18078	1.40216e-49	1.3307e-48	down	PREDICTED: patatin-like protein 3 [Cucumis melo]
CmoCh03G014900	27	0	2.35	0.001	-7.69925	6.62265e-24	3.60855e-23	down	zinc-binding protein [Cucumis melo subsp. melo]
CmoCh03G014920	25	9	10.76	4.3	-1.33438	2.2375e-05	5.05083e-05	down	BnaC03g76950D [Brassica napus]
CmoCh04G000070	157	32	8.21	1.76	-2.1624	2.61527e-53	2.61242e-52	down	PREDICTED: trihelix transcription factor PTL-like [Cucumis sativus]
CmoCh04G000320	2	0	0.13	0.001	-4.02862	0.0312501	0.0472645	down	PREDICTED: gibberellin 2-beta-dioxygenase 8-like [Cucumis melo]// XP_016901640.1 PREDICTED: gibberellin 2-beta-dioxygenase 8-like [Cucumis melo]// XP_016901641.1 PREDICTED: gibberellin 2-beta-dioxygenase 8-like [Cucumis melo]
CmoCh04G000790	3	0	0.13	0.001	-4.58381	0.00390629	0.00682066	down	PREDICTED: U-box domain-containing protein 21-like [Cucumis melo]
CmoCh04G000930	823	79	25.18	2.53	-3.25098	0	0	down	PREDICTED: cytochrome P450 714A1-like [Cucumis sativus]
CmoCh04G000950	22	7	1.58	0.53	-1.50816	6.54574e-06	1.55116e-05	down	-
CmoCh04G001090	35	6	0.76	0.14	-2.39321	3.29471e-14	1.27585e-13	down	PREDICTED: protein NRT1/ PTR FAMILY 5.1 [Cucumis melo]
CmoCh04G001240	25	5	11.36	2.53	-2.16734	1.19201e-09	3.65141e-09	down	PREDICTED: protein trichome birefringence-like 33 [Cucumis melo]
CmoCh04G001370	15	6	2.94	1.26	-1.17795	0.0031563	0.00564488	down	PREDICTED: non-classical arabinogalactan protein 30 [Cucumis melo]
CmoCh04G001790	11	2	0.44	0.08	-2.26472	7.02604e-05	0.000151291	down	PREDICTED: 7-deoxyloganetic acid glucosyltransferase-like isoform X1 [Cucumis melo]
CmoCh04G001800	155	59	19.33	7.82	-1.26374	2.03214e-25	1.15738e-24	down	PREDICTED: thioredoxin H1-like [Cucumis melo]
CmoCh04G001830	2816	902	101.83	34.21	-1.51428	0	0	down	PREDICTED: homeobox protein OTX1-like [Malus domestica]
CmoCh04G001910	3	0	21.21	0.001	-4.58381	0.00390629	0.00682066	down	-
CmoCh04G002250	6.08	1.02	0.61	0.11	-2.32517	0.00257689	0.00466403	down	microneme/rhoptry antigen [Anthurium amnicola]
CmoCh04G002480	13	2	0.62	0.1	-2.50312	3.12169e-06	7.60554e-06	down	PREDICTED: caffeoylshikimate esterase [Cucumis sativus]// KGN50506.1 Esterase/lipase/thioesterase family protein [Cucumis sativus]
CmoCh04G002510	31	9	0.93	0.28	-1.64327	1.85812e-08	5.30727e-08	down	PREDICTED: exocyst complex component EXO70B1 [Cucumis sativus]
CmoCh04G002550	41	6	2.32	0.36	-2.62069	2.4393e-18	1.11303e-17	down	PREDICTED: leucine-rich repeat receptor-like serine/threonine-protein kinase At2g14510 [Cucumis sativus]
CmoCh04G002560	425	155	9.11	3.48	-1.32648	5.25381e-72	6.78515e-71	down	PREDICTED: probable receptor-like protein kinase At2g39360 [Cucumis melo]
CmoCh04G002690	5	1	0.16	0.03	-2.06827	0.012726	0.0207238	down	PREDICTED: ethylene-responsive transcription factor RAP2-7 [Cucumis melo]
CmoCh04G002830	882	247	51.42	15.16	-1.70774	2.42167e-213	8.89884e-212	down	PREDICTED: zinc finger CCCH domain-containing protein 53 isoform X1 [Cucumis melo]// XP_016900271.1 PREDICTED: zinc finger CCCH domain-containing protein 53 isoform X1 [Cucumis melo]
CmoCh04G003100	60.81	20.66	2.29	0.82	-1.40528	1.80826e-12	6.45288e-12	down	PREDICTED: uncharacterized protein LOC103489034 isoform X1 [Cucumis melo]
CmoCh04G003180	422	80	23.13	4.61	-2.26942	4.66573e-149	1.17217e-147	down	PREDICTED: two-component response regulator ARR5-like [Cucumis melo]
CmoCh04G003300	9	3	2.71	0.99	-1.42136	0.0113314	0.0186121	down	PREDICTED: protein COFACTOR ASSEMBLY OF COMPLEX C SUBUNIT B CCB4, chloroplastic [Cucumis melo]
CmoCh04G003360	19	2	0.71	0.08	-3.04607	2.43081e-10	7.76281e-10	down	HAD-like domain-containing protein [Cynara cardunculus var. scolymus]
CmoCh04G003590	9	3	8.05	3.1	-1.42136	0.0113314	0.0186121	down	hypothetical protein Csa_3G175610 [Cucumis sativus]
CmoCh04G004100	2	0	42.04	0.001	-4.02862	0.0312501	0.0472645	down	-
CmoCh04G004410	6	0	1.27	0.001	-5.55341	1.52593e-05	3.49815e-05	down	PREDICTED: MADS-box transcription factor 23 isoform X2 [Cucumis melo]
CmoCh04G004950	355	134	9.19	3.63	-1.27679	2.68716e-57	2.85608e-56	down	PREDICTED: probable indole-3-acetic acid-amido synthetase GH3.1 [Cucumis melo]
CmoCh04G005340	3	0	0.24	0.001	-4.58381	0.00390629	0.00682066	down	PREDICTED: ethylene-responsive transcription factor ERF109 [Cucumis melo]
CmoCh04G005440	3	0	0.25	0.001	-4.58381	0.00390629	0.00682066	down	component of oligomeric golgi complex 4 [Monoraphidium neglectum]// KIZ07103.1 component of oligomeric golgi complex 4 [Monoraphidium neglectum]
CmoCh04G005460	11	3	0.69	0.2	-1.70712	0.000940733	0.0017873	down	PREDICTED: probable WRKY transcription factor 9 [Cucumis melo]
CmoCh04G005510	102	36	12.65	4.75	-1.37152	2.4973e-19	1.17791e-18	down	PREDICTED: basic blue protein-like [Cucumis melo]
CmoCh04G005770	25	9	0.92	0.35	-1.33438	2.2375e-05	5.05083e-05	down	PREDICTED: COBRA-like protein 6, partial [Cucumis melo]
CmoCh04G005800	254	18	4.91	0.36	-3.68192	1.7648e-147	4.38575e-146	down	PREDICTED: receptor like protein 30-like isoform X2 [Pyrus x bretschneideri]
CmoCh04G005810	80	31	21.62	9.1	-1.23649	2.67879e-13	9.95517e-13	down	transmembrane protein [Arabidopsis thaliana]// ANM58547.1 transmembrane protein [Arabidopsis thaliana]
CmoCh04G005880	2	0	0.49	0.001	-4.02862	0.0312501	0.0472645	down	BnaC04g41850D [Brassica napus]
CmoCh04G006550	2	0	9.63	0.001	-4.02862	0.0312501	0.0472645	down	-
CmoCh04G006700	8384	3261	407.22	166.45	-1.23425	0	0	down	PREDICTED: oxygen-evolving enhancer protein 2, chloroplastic [Cucumis melo]
CmoCh04G007320	7	2	2.28	0.71	-1.62228	0.00935554	0.0155574	down	PREDICTED: uncharacterized protein LOC103493098 [Cucumis melo]
CmoCh04G007330	4	0	3.27	0.001	-4.98373	0.00048829	0.000958718	down	Protein yibA, partial [Anthurium amnicola]
CmoCh04G007400	168	14	13.99	1.23	-3.44578	1.69355e-92	2.72949e-91	down	PREDICTED: ethylene-responsive transcription factor ERF061-like [Cucumis sativus]
CmoCh04G007420	69	27	1.17	0.48	-1.22195	1.78563e-11	6.06101e-11	down	PREDICTED: probable WRKY transcription factor 41 [Cucumis melo]
CmoCh04G007510	746	181	146.91	38.32	-1.91445	3.70685e-211	1.34422e-209	down	PREDICTED: arabinogalactan peptide 20-like [Nelumbo nucifera]
CmoCh04G007600	2238	696	42.94	13.97	-1.55685	0	0	down	PREDICTED: probable membrane-associated kinase regulator 2 [Cucumis melo]
CmoCh04G007680	94	1	5.18	0.06	-6.26575	5.65019e-74	7.46497e-73	down	PREDICTED: probable WRKY transcription factor 29 [Cucumis melo]
CmoCh04G007730	94	35	4.67	1.83	-1.29435	1.03733e-16	4.45587e-16	down	Protein BYPASS-related protein [Corchorus olitorius]
CmoCh04G007820	8	1	5.78	0.82	-2.73251	8.79809e-05	0.000187486	down	-
CmoCh04G007850	46	0	15.74	0.001	-8.46505	6.25918e-39	4.90205e-38	down	-
CmoCh04G007860	324	9	19.88	0.58	-5.02344	1.55757e-229	6.10619e-228	down	PREDICTED: B3 domain-containing transcription factor NGA1-like [Cucumis sativus]// XP_011653181.1 PREDICTED: B3 domain-containing transcription factor NGA1-like [Cucumis sativus]// XP_011653182.1 PREDICTED: B3 domain-containing transcription factor NGA1-like [Cucumis sativus]
CmoCh04G008020	4	0	4.58	0.001	-4.98373	0.00048829	0.000958718	down	-
CmoCh04G008230	346	118	17.27	6.19	-1.42303	1.44788e-65	1.71998e-64	down	PREDICTED: probable pectinesterase 53 [Cucumis melo]
CmoCh04G008540	9	2	4.74	1.18	-1.97896	0.00053508	0.0010461	down	-
CmoCh04G008670	212	29	8.29	1.19	-2.73686	2.88032e-93	4.66402e-92	down	PREDICTED: protein UPSTREAM OF FLC isoform X1 [Cucumis sativus]
CmoCh04G008680	7	2	0.63	0.19	-1.62228	0.00935554	0.0155574	down	PREDICTED: major pollen allergen Lol p 11-like [Cucumis melo]
CmoCh04G008690	48	8	1.75	0.31	-2.43946	7.34081e-20	3.53014e-19	down	PREDICTED: ETHYLENE INSENSITIVE 3-like 5 protein [Ziziphus jujuba]
CmoCh04G008780	8	2	2.82	0.77	-1.81162	0.00231579	0.00421803	down	-
CmoCh04G008890	581	259	74.65	35.4	-1.0372	7.23285e-67	8.75439e-66	down	PREDICTED: phosphoenolpyruvate carboxykinase [ATP]-like [Cucumis melo]
CmoCh04G008900	3101.75	1418.81	77.52	37.13	-1.00022	0	0	down	PREDICTED: phosphoenolpyruvate carboxykinase [ATP]-like [Cucumis melo]
CmoCh04G009040	5	0	0.31	0.001	-5.29651	6.10368e-05	0.00013234	down	PREDICTED: transcription factor bHLH94-like [Nelumbo nucifera]
CmoCh04G009130	97	30	2.69	0.87	-1.56119	5.46194e-22	2.81577e-21	down	PREDICTED: L-type lectin-domain containing receptor kinase IX.1-like [Cucumis sativus]
CmoCh04G009160	18	0	0.25	0.001	-7.11775	4.44243e-16	1.8559e-15	down	Concanavalin A-like lectin/glucanase superfamily [Cynara cardunculus var. scolymus]
CmoCh04G009180	61	26	1.63	0.73	-1.09873	7.58104e-09	2.21704e-08	down	PREDICTED: probable rhamnogalacturonate lyase B [Prunus mume]
CmoCh04G009190	143	29	9.56	2.04	-2.16923	6.60165e-49	6.19481e-48	down	PREDICTED: dof zinc finger protein DOF5.7-like [Gossypium hirsutum]
CmoCh04G009210	84	7	1.1	0.1	-3.43475	4.94162e-47	4.49921e-46	down	PREDICTED: protein NETWORKED 2B [Cucumis melo]
CmoCh04G009220	14	3	0.42	0.09	-2.05141	1.47395e-05	3.39452e-05	down	PREDICTED: AP2-like ethylene-responsive transcription factor AIL6 [Cucumis melo]
CmoCh04G009270	12	3	1.21	0.32	-1.83124	0.000247108	0.000502086	down	Cystatin domain-containing protein [Cephalotus follicularis]
CmoCh04G009280	14	6	11.97	5.91	-1.0793	0.00864201	0.0144497	down	-
CmoCh04G009610	22	3	0.76	0.11	-2.69863	8.9608e-11	2.92745e-10	down	PB1 domain-containing protein [Cephalotus follicularis]
CmoCh04G010010	23	4	1.34	0.24	-2.36123	6.41757e-10	1.99603e-09	down	PREDICTED: gibberellin 2-beta-dioxygenase 8-like [Cucumis sativus]
CmoCh04G010110	16529	3527	735.71	164.87	-2.10041	0	0	down	PREDICTED: thiamine thiazole synthase, chloroplastic [Cucumis melo]
CmoCh04G010120	18	3	0.46	0.08	-2.41101	5.71492e-08	1.57929e-07	down	PREDICTED: COBRA-like protein 10 [Cucumis melo]
CmoCh04G010390	4	0	0.15	0.001	-4.98373	0.00048829	0.000958718	down	PREDICTED: transcription factor MYB35 [Cucumis melo]
CmoCh04G010490	64	16	2.44	0.64	-1.86417	1.125e-18	5.19087e-18	down	PREDICTED: transcription factor bHLH111 [Cucumis melo]
CmoCh04G010570	4	0	0.4	0.001	-4.98373	0.00048829	0.000958718	down	PREDICTED: MLP-like protein 328 [Cucumis melo]
CmoCh04G010740	4930	2165	265	122.4	-1.05914	0	0	down	PREDICTED: annexin D5 [Cucumis sativus]
CmoCh04G011140	210.6	90.8	11.33	5.14	-1.08426	5.30137e-27	3.17552e-26	down	PREDICTED: vacuolar iron transporter 1-like [Juglans regia]// XP_018806609.1 PREDICTED: vacuolar iron transporter 1-like [Juglans regia]
CmoCh04G011390	36	1	1.01	0.03	-4.88431	3.4367e-26	2.00839e-25	down	PREDICTED: protein NRT1/ PTR FAMILY 5.1 [Cucumis melo]
CmoCh04G011400	15	0	1	0.001	-6.85679	1.13715e-13	4.30433e-13	down	PREDICTED: LOB domain-containing protein 15 [Cucumis melo]
CmoCh04G011480	500	195	18.19	7.44	-1.22991	2.5219e-75	3.37724e-74	down	PREDICTED: probable sodium-coupled neutral amino acid transporter 6 [Cucumis sativus]// KGN50712.1 Amino acid transporter [Cucumis sativus]
CmoCh04G011580	17	5	1.88	0.59	-1.61447	5.08549e-05	0.000111527	down	PREDICTED: abscisic acid receptor PYL4 [Cucumis melo]
CmoCh04G011930	53	1	2.34	0.05	-5.44063	1.40813e-40	1.13873e-39	down	PREDICTED: glycosyltransferase family 64 protein C4 [Cucumis melo]
CmoCh04G012020	686	297	66.6	30.53	-1.0794	2.05733e-87	3.16406e-86	down	PREDICTED: sedoheptulose-1,7-bisphosphatase, chloroplastic [Cucumis melo]
CmoCh04G012120	5	1	1.24	0.27	-2.06827	0.012726	0.0207238	down	PREDICTED: 17.8 kDa class I heat shock protein-like [Cucumis melo]
CmoCh04G012130	295.55	105.2	14.4	5.39	-1.36616	7.86166e-53	7.80502e-52	down	HSP18.1B [Citrullus lanatus]
CmoCh04G012140	171.23	13.86	36.8	3.21	-3.4713	7.6383e-95	1.25829e-93	down	HSP18.1B [Citrullus lanatus]
CmoCh04G012150	2	0	0.64	0.001	-4.02862	0.0312501	0.0472645	down	PREDICTED: 18.1 kDa class I heat shock protein-like [Cucumis melo]
CmoCh04G012160	15	4	3.86	1.12	-1.7489	7.33407e-05	0.000157616	down	PREDICTED: 17.8 kDa class I heat shock protein-like [Cucumis melo]
CmoCh04G012170	27.43	10.91	2.35	0.99	-1.15879	6.44696e-05	0.000139388	down	HSP18.1B [Citrullus lanatus]
CmoCh04G012240	11.5	1.03	0.32	0.03	-3.30973	6.67875e-08	1.83717e-07	down	cucumisin [Siraitia grosvenorii]
CmoCh04G012260	2.04	0	0.05	0.001	-4.02862	0.0312501	0.0472645	down	cucumisin [Siraitia grosvenorii]
CmoCh04G012270	1942.96	36	42.93	0.83	-5.62142	0	0	down	cucumisin [Siraitia grosvenorii]
CmoCh04G012380	2	0	0.63	0.001	-4.02862	0.0312501	0.0472645	down	-
CmoCh04G012410	929	422.06	39.69	18.93	-1.01019	2.86928e-105	5.16845e-104	down	PREDICTED: ribulose bisphosphate carboxylase/oxygenase activase 2, chloroplastic-like [Cucumis melo]
CmoCh04G012680	2	0	5.32	0.001	-4.02862	0.0312501	0.0472645	down	-
CmoCh04G013220	35	10	1.32	0.4	-1.66755	1.59308e-09	4.84713e-09	down	PREDICTED: cytokinin dehydrogenase 6 [Cucumis melo]
CmoCh04G013260	195.59	56.88	2.86	0.87	-1.65172	1.66386e-46	1.50347e-45	down	PREDICTED: thioredoxin-like protein YLS8 isoform X1 [Cucumis sativus]
CmoCh04G013270	888.41	310.12	28.19	10.31	-1.38991	3.27558e-171	9.54281e-170	down	Chaperone protein DnaJ [Morus notabilis]// EXC33991.1 Chaperone protein DnaJ [Morus notabilis]
CmoCh04G013280	9	0	0.3	0.001	-6.1281	2.98049e-08	8.38956e-08	down	BTB/POZ domain protein [Arabidopsis thaliana]// ANM63390.1 BTB/POZ domain protein [Arabidopsis thaliana]
CmoCh04G013400	4	0	0.4	0.001	-4.98373	0.00048829	0.000958718	down	PREDICTED: GEM-like protein 4 [Cucumis melo]
CmoCh04G013470	2	0	0.32	0.001	-4.02862	0.0312501	0.0472645	down	Glycoside hydrolase, clan GH-D [Corchorus capsularis]
CmoCh04G014070	3	0	15.85	0.001	-4.58381	0.00390629	0.00682066	down	-
CmoCh04G014160	1307	317	64.08	16.33	-1.91526	0	0	down	PREDICTED: annexin D4 [Cucumis sativus]// KGN52303.1 Annexin 11 [Cucumis sativus]
CmoCh04G014310	345	115	10.96	3.83	-1.45597	1.81572e-67	2.21519e-66	down	PREDICTED: serine carboxypeptidase-like 27 [Cucumis melo]
CmoCh04G014390	3	0	0.64	0.001	-4.58381	0.00390629	0.00682066	down	-
CmoCh04G014450	12	0	0.37	0.001	-6.53797	5.82167e-11	1.92658e-10	down	PREDICTED: BTB/POZ domain-containing protein At5g03250-like [Cucumis melo]
CmoCh04G014490	4	0	0.41	0.001	-4.98373	0.00048829	0.000958718	down	PREDICTED: probable acetyltransferase NATA1-like [Cucumis melo]
CmoCh04G014690	60	27	1.71	0.8	-1.02073	6.92989e-08	1.90454e-07	down	PREDICTED: 4-coumarate--CoA ligase-like 5 isoform X1 [Cucumis melo]
CmoCh04G014750	673	238	74.26	27.86	-1.37116	8.63858e-119	1.75187e-117	down	PREDICTED: non-symbiotic hemoglobin 2 [Cucumis melo]
CmoCh04G014840	1448	484	52.4	18.37	-1.45272	1.18635e-298	6.26355e-297	down	PREDICTED: GABA transporter 1-like isoform X1 [Cucumis melo]
CmoCh04G014850	1039	447	33.72	15.21	-1.0886	2.6026e-133	5.83625e-132	down	PREDICTED: GABA transporter 1-like [Cucumis melo]
CmoCh04G015060	177	44	22.93	6.07	-1.87728	5.88438e-50	5.61154e-49	down	PREDICTED: germin-like protein subfamily 3 member 2 [Cucumis sativus]
CmoCh04G015130	20	7	2.18	0.81	-1.37151	7.01176e-05	0.000151055	down	PREDICTED: transcription repressor OFP13-like [Cucumis melo]
CmoCh04G015520	2	0	1.24	0.001	-4.02862	0.0312501	0.0472645	down	-
CmoCh04G015610	2454	531	235.31	53.9	-2.08006	0	0	down	PREDICTED: auxin-responsive protein IAA32 [Cucumis melo]
CmoCh04G015670	2048	932	48.08	22.91	-1.00768	1.51445e-228	5.91193e-227	down	PREDICTED: probable leucine-rich repeat receptor-like protein kinase At1g68400 [Cucumis melo]
CmoCh04G015850	2430	601	35.56	9.19	-1.88727	0	0	down	PREDICTED: alpha-xylosidase 1-like [Cucumis melo]
CmoCh04G015900	102.55	43.95	34.85	16.38	-1.09694	4.56749e-14	1.75958e-13	down	PREDICTED: probable galacturonosyltransferase-like 3 [Prunus mume]
CmoCh04G015910	91	28	5.56	1.8	-1.56832	8.71094e-21	4.34051e-20	down	PREDICTED: AP2/ERF and B3 domain-containing transcription repressor RAV2-like [Cucumis melo]
CmoCh04G015920	132	38	4.13	1.25	-1.66532	3.23436e-32	2.20914e-31	down	PREDICTED: LOW QUALITY PROTEIN: transcription factor LUX [Cucumis melo]
CmoCh04G016170	10	1	0.42	0.04	-3.0498	2.55623e-06	6.27727e-06	down	PREDICTED: protein MIZU-KUSSEI 1 [Cucumis melo]
CmoCh04G016190	255	62	7.04	1.79	-1.91008	4.8413e-73	6.32652e-72	down	PREDICTED: ABC transporter G family member 21-like isoform X1 [Pyrus x bretschneideri]
CmoCh04G016300	117	49	6.16	2.71	-1.12571	1.75925e-16	7.48455e-16	down	PREDICTED: loricrin-like [Arachis duranensis]
CmoCh04G016330	303.44	29.44	7.02	0.71	-3.25184	1.34601e-157	3.56007e-156	down	PREDICTED: protein NSP-INTERACTING KINASE 2 isoform X3 [Cucumis sativus]
CmoCh04G016340	209	95	7.8	3.72	-1.00855	5.22937e-24	2.85955e-23	down	PREDICTED: LOW QUALITY PROTEIN: peroxidase 11 [Cucumis melo]
CmoCh04G016350	88	36	12.9	5.63	-1.15882	2.22168e-13	8.29556e-13	down	PREDICTED: uncharacterized N-acetyltransferase ycf52 [Cucumis melo]
CmoCh04G016400	283	114	20.7	8.8	-1.18288	6.74687e-41	5.49641e-40	down	hypothetical protein Csa_5G607970 [Cucumis sativus]
CmoCh04G016520	61	17	2.41	0.7	-1.70822	5.98123e-16	2.48594e-15	down	Formate--tetrahydrofolate ligase [Gossypium arboreum]
CmoCh04G016530	3	0	3.26	0.001	-4.58381	0.00390629	0.00682066	down	-
CmoCh04G016810	21	4	36.39	8.3	-2.23076	1.39406e-08	4.01131e-08	down	-
CmoCh04G017020	1512	185	42.71	5.47	-2.90201	0	0	down	PREDICTED: LOW QUALITY PROTEIN: protein NRT1/ PTR FAMILY 2.13-like [Cucumis melo]
CmoCh04G017110	60	27	3.54	1.68	-1.02073	6.92989e-08	1.90454e-07	down	PREDICTED: LOW QUALITY PROTEIN: alpha-amylase 3, chloroplastic [Cucumis melo]
CmoCh04G017230	199	71	8.91	3.34	-1.35736	7.34478e-36	5.43853e-35	down	PREDICTED: binding partner of ACD11 1 [Cucumis melo]
CmoCh04G017240	8	1	1.64	0.22	-2.73251	8.79809e-05	0.000187486	down	PREDICTED: transcription factor PRE6-like [Cucumis sativus]// KGN51900.1 Transcription regulator [Cucumis sativus]
CmoCh04G017720	336	21	10.99	0.72	-3.86434	4.19275e-202	1.46454e-200	down	PREDICTED: heparanase-like protein 1 [Cucumis sativus]
CmoCh04G017800	9	2	5.1	1.28	-1.97896	0.00053508	0.0010461	down	-
CmoCh04G017880	3	0	0.12	0.001	-4.58381	0.00390629	0.00682066	down	PREDICTED: protein AF-9 isoform X1 [Populus euphratica]// XP_011011887.1 PREDICTED: protein AF-9 isoform X1 [Populus euphratica]// XP_011011894.1 PREDICTED: protein AF-9 isoform X1 [Populus euphratica]
CmoCh04G018070	5	0	0.36	0.001	-5.29651	6.10368e-05	0.00013234	down	PREDICTED: probable xyloglucan endotransglucosylase/hydrolase protein 33 [Cucumis melo]// ADN33843.1 xyloglucan endotransglycosylase hydrolase [Cucumis melo subsp. melo]
CmoCh04G018080	21	2	1.06	0.11	-3.18952	7.39018e-12	2.5555e-11	down	ubiquitin-protein ligase [Cucumis melo subsp. melo]
CmoCh04G018270	22	0	1.54	0.001	-7.40537	1.08477e-19	5.18764e-19	down	PREDICTED: axial regulator YABBY 4-like [Cucumis sativus]
CmoCh04G018450	367	76	12.28	2.67	-2.14191	3.58318e-121	7.43618e-120	down	Glutamate--glyoxylate aminotransferase 2 [Morus notabilis]// EXB82522.1 Glutamate--glyoxylate aminotransferase 2 [Morus notabilis]
CmoCh04G018620	11	0	0.65	0.001	-6.41385	4.65722e-10	1.46204e-09	down	PREDICTED: ethylene-responsive transcription factor ESR2-like [Cucumis melo]
CmoCh04G018630	2944	834	76.14	22.59	-1.69147	0	0	down	PREDICTED: BTB/POZ domain-containing protein At1g67900 [Cucumis melo]// XP_016900159.1 PREDICTED: BTB/POZ domain-containing protein At1g67900 [Cucumis melo]
CmoCh04G018640	4	0	0.91	0.001	-4.98373	0.00048829	0.000958718	down	-
CmoCh04G018740	9.9	0	0.37	0.001	-6.27804	3.72569e-09	1.10838e-08	down	PREDICTED: cytochrome P450 71B37-like [Cucumis melo]
CmoCh04G018800	37	1	1.65	0.05	-4.92369	4.79603e-27	2.87407e-26	down	PREDICTED: cytochrome P450 71B2-like isoform X1 [Cucumis sativus]
CmoCh04G018810	44.23	11.97	1.33	0.38	-1.73641	4.48289e-12	1.56748e-11	down	PREDICTED: cytochrome P450 71B37-like [Cucumis melo]
CmoCh04G018840	7.88	2.03	0.21	0.06	-1.81162	0.00231579	0.00421803	down	PREDICTED: cytochrome P450 71B37-like [Cucumis melo]
CmoCh04G018860	384.98	110	14.23	4.27	-1.67824	6.80766e-92	1.09018e-90	down	PREDICTED: cytochrome P450 71B2-like isoform X1 [Cucumis sativus]
CmoCh04G018970	6	0	2.16	0.001	-5.55341	1.52593e-05	3.49815e-05	down	-
CmoCh04G019000	493	109	24.66	5.73	-2.04802	4.46128e-153	1.15449e-151	down	PREDICTED: very-long-chain 3-oxoacyl-CoA reductase-like protein At1g24470 [Cucumis melo]
CmoCh04G019020	155	23	1.39	0.22	-2.61826	2.1155e-65	2.50658e-64	down	PREDICTED: myosin-10 isoform X1 [Cucumis melo]
CmoCh04G019150	982	317	30.52	10.32	-1.50285	9.29389e-215	3.44737e-213	down	Remorin family protein [Theobroma cacao]
CmoCh04G019320	1863	842	162.96	77.87	-1.01759	1.26468e-211	4.59824e-210	down	chlorophyll a/b-binding protein type II precursor [Populus trichocarpa]// EEE84114.1 chlorophyll a/b-binding protein type II precursor [Populus trichocarpa]
CmoCh04G019340	21	7.18	9.81	3.74	-1.44145	2.18109e-05	4.93278e-05	down	chaperone dnaJ-like protein [Medicago truncatula]// AES72031.1 chaperone dnaJ-like protein [Medicago truncatula]
CmoCh04G019800	334	12	14.27	0.54	-4.65697	6.87193e-228	2.67123e-226	down	PREDICTED: trihelix transcription factor PTL-like [Cucumis sativus]
CmoCh04G019990	4	0	0.17	0.001	-4.98373	0.00048829	0.000958718	down	Retrovirus-related Pol polyprotein from transposon TNT 1-94 [Cajanus cajan]
CmoCh04G020070	78	30	8.35	3.41	-1.24715	2.61378e-13	9.72273e-13	down	Multiple C2 and transmembrane domain-containing protein 1 [Morus notabilis]// EXC31278.1 Multiple C2 and transmembrane domain-containing protein 1 [Morus notabilis]
CmoCh04G020080	66	27	3.89	1.67	-1.15795	2.54912e-10	8.13311e-10	down	PREDICTED: NADPH-dependent pterin aldehyde reductase-like [Cucumis sativus]
CmoCh04G020250	140	43	8.39	2.71	-1.57232	1.96408e-31	1.31479e-30	down	PREDICTED: NADPH-dependent pterin aldehyde reductase-like [Cucumis sativus]
CmoCh04G020570	59	0	1.19	0.001	-8.82323	5.80163e-50	5.53455e-49	down	PREDICTED: probable LRR receptor-like serine/threonine-protein kinase At4g36180 isoform X2 [Cucumis melo]
CmoCh04G020580	461	73	25.36	4.22	-2.52881	9.59873e-185	3.03721e-183	down	PREDICTED: NADPH-dependent pterin aldehyde reductase-like isoform X1 [Cucumis sativus]
CmoCh04G020630	16.97	7.24	13.89	6.81	-1.13869	0.00182058	0.00335665	down	PREDICTED: NADH dehydrogenase [ubiquinone] 1 beta subcomplex subunit 7 [Cucumis melo]
CmoCh04G020640	155	42	9.67	2.76	-1.75288	3.71942e-40	2.98855e-39	down	MYB12 [Eriobotrya japonica]
CmoCh04G020730	2	0.5	6.23	1.92	-4.02862	0.0312501	0.0472645	down	ATP synthase subunit c, chloroplastic [Ananas comosus]
CmoCh04G021020	350	110	22.91	7.59	-1.54078	3.62463e-74	4.79572e-73	down	PREDICTED: AP2/ERF and B3 domain-containing transcription factor RAV1-like [Cucumis sativus]
CmoCh04G021480	542	230	23.48	10.46	-1.10822	2.2737e-69	2.85221e-68	down	PREDICTED: zinc finger protein CONSTANS-LIKE 16-like [Juglans regia]
CmoCh04G021600	11	1	0.81	0.08	-3.18561	4.17743e-07	1.08839e-06	down	PREDICTED: adenylate isopentenyltransferase-like [Cucumis melo]
CmoCh04G021610	24	3	1.68	0.22	-2.82345	3.16276e-12	1.11323e-11	down	BnaA07g27120D [Brassica napus]
CmoCh04G021730	52	13	1.12	0.29	-1.86238	1.94652e-15	7.92525e-15	down	PREDICTED: probable inactive leucine-rich repeat receptor-like protein kinase At1g66830 [Cucumis melo]
CmoCh04G021750	4	0	0.17	0.001	-4.98373	0.00048829	0.000958718	down	PREDICTED: two-component response regulator ORR24 [Prunus mume]
CmoCh04G021920	381.89	115	7.59	2.39	-1.60289	1.21803e-85	1.83637e-84	down	PREDICTED: auxin efflux carrier component 4-like isoform X1 [Cucumis melo]
CmoCh04G021960	424	93	24.39	5.63	-2.05931	1.53699e-132	3.42436e-131	down	PREDICTED: heavy metal-associated isoprenylated plant protein 37 [Vitis vinifera]
CmoCh04G022000	359	74	78.23	17.39	-2.14854	1.15511e-118	2.33736e-117	down	DEAD-box ATP-dependent RNA helicase 28 [Anthurium amnicola]
CmoCh04G022070	3	0	0.46	0.001	-4.58381	0.00390629	0.00682066	down	PREDICTED: probable calcium-binding protein CML25 [Cucumis sativus]// KGN51467.1 Polcalcin Jun o [Cucumis sativus]
CmoCh04G022140	1765	796	50.16	23.7	-1.02068	1.18093e-201	4.10423e-200	down	PREDICTED: endoglucanase 8 [Cucumis sativus]
CmoCh04G022270	60	27	1.08	0.51	-1.02073	6.92989e-08	1.90454e-07	down	PREDICTED: LOW QUALITY PROTEIN: MACPF domain-containing protein At1g14780-like [Cucumis melo]
CmoCh04G022280	5371	1758	330.84	114.03	-1.48315	0	0	down	PREDICTED: vacuolar iron transporter 1-like [Cucumis melo]
CmoCh04G022460	151	30	15.8	3.33	-2.19899	1.64554e-52	1.62491e-51	down	zinc finger family protein [Populus trichocarpa]// EEE88922.1 zinc finger family protein [Populus trichocarpa]
CmoCh04G022470	143	38	17.79	5.03	-1.78069	3.76682e-38	2.91693e-37	down	PREDICTED: protein SHOOT GRAVITROPISM 5 [Cucumis melo]
CmoCh04G022530	141	62	14.28	6.65	-1.05587	8.62547e-18	3.8553e-17	down	PREDICTED: protein YLS3 [Cucumis melo]
CmoCh04G022690	138	60	23.53	10.95	-1.07209	6.29909e-18	2.83295e-17	down	-
CmoCh04G022710	106	2	2.62	0.05	-5.51796	3.50906e-80	4.98504e-79	down	Glutaredoxin domain-containing protein/DEP domain-containing protein/DUF547 domain-containing protein [Cephalotus follicularis]
CmoCh04G022760	8.28	1.27	2.45	0.41	-2.73251	8.79809e-05	0.000187486	down	PREDICTED: multicopper oxidase LPR1-like [Cucumis melo]
CmoCh04G022800	9	2	0.44	0.1	-1.97896	0.00053508	0.0010461	down	haloacid dehalogenase-like hydrolase family protein [Populus trichocarpa]// EEE99242.1 haloacid dehalogenase-like hydrolase family protein [Populus trichocarpa]
CmoCh04G022990	16	5	9.6	3.39	-1.52769	0.000176348	0.000363783	down	PREDICTED: DNA-directed RNA polymerase V subunit 1 [Cucumis melo]
CmoCh04G023240	75	20	1.45	0.41	-1.77277	1.24433e-20	6.16792e-20	down	nfrkb [Gossypium arboreum]
CmoCh04G023700	3	0	35.78	0.001	-4.58381	0.00390629	0.00682066	down	-
CmoCh04G023720	125	55	4.22	1.95	-1.05476	4.49686e-16	1.87807e-15	down	phytoene synthase [Cucurbita pepo subsp. ovifera]
CmoCh04G024070	76	16	4.2	0.93	-2.11163	9.2015e-26	5.3053e-25	down	PREDICTED: nudix hydrolase 18, mitochondrial [Cucumis sativus]// KGN51037.1 MutT-like protein [Cucumis sativus]
CmoCh04G024080	454.06	166	7.22	2.76	-1.32284	1.59419e-76	2.17181e-75	down	PREDICTED: condensin complex subunit 3 [Cucumis melo]
CmoCh04G024230	129	35	12.24	3.52	-1.75045	8.2589e-34	5.85129e-33	down	PREDICTED: protein MARD1-like [Cucumis melo]
CmoCh04G024270	68	18	2.44	0.68	-1.78272	6.95112e-19	3.22948e-18	down	-
CmoCh04G024280	10	0	18.52	0.001	-6.27804	3.72569e-09	1.10838e-08	down	-
CmoCh04G024410	2	0	0.06	0.001	-4.02862	0.0312501	0.0472645	down	PREDICTED: nitrate reductase [NADH] [Cucumis melo]
CmoCh04G024530	160	34	4.99	1.11	-2.10254	1.84726e-52	1.82279e-51	down	PREDICTED: auxin transporter-like protein 3 [Cucumis melo]
CmoCh04G024610	23	7	3.03	0.98	-1.57192	2.88012e-06	7.03938e-06	down	PREDICTED: ethylene-responsive transcription factor ERF014-like [Cucumis melo]
CmoCh04G024630	2	0	0.08	0.001	-4.02862	0.0312501	0.0472645	down	PREDICTED: WAT1-related protein At4g08290 [Cucumis melo]
CmoCh04G024640	9	1	0.42	0.05	-2.89986	1.52375e-05	3.49815e-05	down	PREDICTED: WAT1-related protein At1g21890-like [Gossypium hirsutum]
CmoCh04G024700	1666	396	93.08	23.28	-1.94445	0	0	down	PREDICTED: photosystem II 22 kDa protein, chloroplastic [Cucumis sativus]// KGN44342.1 Photosystem II protein [Cucumis sativus]
CmoCh04G024850	35	14	1.42	0.59	-1.187	4.10858e-06	9.89276e-06	down	PREDICTED: aspartic proteinase Asp1 [Cucumis melo]
CmoCh04G024990	12	4	0.38	0.13	-1.43008	0.00208824	0.00382252	down	PREDICTED: metal transporter Nramp5-like [Cucumis melo]// XP_008459159.1 PREDICTED: metal transporter Nramp5-like [Cucumis melo]
CmoCh04G025230	37.45	8	4.48	1.02	-2.06511	7.24676e-13	2.63867e-12	down	PREDICTED: protein STAY-GREEN LIKE, chloroplastic [Cucumis melo]
CmoCh04G025270	24	9	7.66	3.14	-1.2758	6.57363e-05	0.000142049	down	PREDICTED: F-box protein SKP2A isoform X2 [Cucumis sativus]
CmoCh04G025280	51	21	9.52	4.21	-1.14757	4.69366e-08	1.30572e-07	down	PREDICTED: F-box protein SKP2A isoform X1 [Cucumis melo]// XP_016899427.1 PREDICTED: F-box protein SKP2A isoform X1 [Cucumis melo]
CmoCh04G025300	6	1	0.22	0.04	-2.32517	0.00257689	0.00466403	down	PREDICTED: chaperone protein dnaJ 10 isoform X1 [Cucumis melo]
CmoCh04G025530	7	2	1.26	0.39	-1.62228	0.00935554	0.0155574	down	-
CmoCh04G025820	143	49	2.23	0.8	-1.41492	8.71917e-28	5.32581e-27	down	PREDICTED: probable LRR receptor-like serine/threonine-protein kinase At1g34110 [Cucumis melo]
CmoCh04G026560	184	49	11.66	3.27	-1.77832	1.58838e-48	1.48191e-47	down	PREDICTED: probable phytol kinase 1, chloroplastic isoform X1 [Cucumis melo]
CmoCh04G026790	20	0	0.52	0.001	-7.26871	6.9419e-18	3.11391e-17	down	PREDICTED: glycerol-3-phosphate dehydrogenase SDP6, mitochondrial isoform X2 [Cucumis melo]// XP_016902020.1 PREDICTED: glycerol-3-phosphate dehydrogenase SDP6, mitochondrial isoform X1 [Cucumis melo]
CmoCh04G026820	15	4	0.74	0.21	-1.7489	7.33407e-05	0.000157616	down	PREDICTED: probable protein S-acyltransferase 15 [Cucumis melo]
CmoCh04G026830	2	0	0.32	0.001	-4.02862	0.0312501	0.0472645	down	PREDICTED: vacuolar amino acid transporter 1-like [Cucumis sativus]
CmoCh04G027400	6	0	0.14	0.001	-5.55341	1.52593e-05	3.49815e-05	down	PREDICTED: ABC transporter G family member 6 [Cucumis melo]
CmoCh04G027480	41	14.02	1.46	0.52	-1.41448	9.74344e-09	2.8302e-08	down	PREDICTED: WAT1-related protein At2g39510-like, partial [Cucumis melo]
CmoCh04G027490	3	0	0.38	0.001	-4.58381	0.00390629	0.00682066	down	Dehydrogenase, E1 component [Corchorus capsularis]
CmoCh04G027620	5	1	0.52	0.11	-2.06827	0.012726	0.0207238	down	PREDICTED: CASP-like protein 4D1 [Cucumis melo]
CmoCh04G027900	226	60	10.73	2.99	-1.78321	2.64679e-59	2.91084e-58	down	PREDICTED: zinc finger protein CONSTANS-LIKE 6 [Cucumis melo]
CmoCh04G027920	5	0	0.38	0.001	-5.29651	6.10368e-05	0.00013234	down	PREDICTED: mucin-1 [Cucumis sativus]// KGN51336.1 hypothetical protein Csa_5G517830 [Cucumis sativus]
CmoCh04G028140	7	1	0.7	0.11	-2.54317	0.000488299	0.000958718	down	PREDICTED: ABC transporter B family member 26, chloroplastic-like [Cucumis melo]// XP_008458807.1 PREDICTED: ABC transporter B family member 26, chloroplastic-like [Cucumis melo]
CmoCh04G028160	125	30	98.03	26.98	-1.92662	5.34414e-37	4.06526e-36	down	PREDICTED: cyclin-dependent protein kinase inhibitor SMR3 [Nelumbo nucifera]
CmoCh04G028400	198	35	3.02	0.56	-2.36807	1.17444e-74	1.56215e-73	down	PREDICTED: L-aspartate oxidase, chloroplastic [Cucumis melo]
CmoCh04G028440	6	1	18.7	3.83	-2.32517	0.00257689	0.00466403	down	-
CmoCh04G028590	46	0	3.32	0.001	-8.46505	6.25918e-39	4.90205e-38	down	PREDICTED: metalloendoproteinase 3-MMP-like [Cucumis melo]
CmoCh04G028600	7	0	0.5	0.001	-5.77141	1.90744e-06	4.7317e-06	down	PREDICTED: metalloendoproteinase 3-MMP-like [Cucumis melo]
CmoCh04G028610	864	114	48.97	6.8	-2.79266	0	0	down	PREDICTED: metalloendoproteinase 2-MMP-like [Juglans regia]
CmoCh04G028640	20	0	1.44	0.001	-7.26871	6.9419e-18	3.11391e-17	down	PREDICTED: metalloendoproteinase 3-MMP-like [Cucumis melo]
CmoCh04G028650	8	0	0.44	0.001	-5.96075	2.38434e-07	6.31669e-07	down	PREDICTED: metalloendoproteinase 3-MMP-like [Cucumis melo]
CmoCh04G028750	221	53	10	2.52	-1.92954	1.84732e-64	2.16555e-63	down	PREDICTED: probable prolyl 4-hydroxylase 7 [Cucumis melo]
CmoCh04G028790	17	3	0.72	0.13	-2.32916	2.70681e-07	7.14146e-07	down	PREDICTED: NADH dehydrogenase [ubiquinone] complex I, assembly factor 7 homolog [Cucumis melo]
CmoCh04G028870	257	85	28.76	10.1	-1.4669	2.29196e-51	2.23203e-50	down	PREDICTED: transcription factor PRE6-like [Arachis duranensis]// XP_016179107.1 PREDICTED: transcription factor PRE6-like [Arachis ipaensis]
CmoCh04G028930	17	3	1.2	0.22	-2.32916	2.70681e-07	7.14146e-07	down	PREDICTED: myb-related protein 306-like [Cucumis sativus]
CmoCh04G029040	16	5	0.85	0.28	-1.52769	0.000176348	0.000363783	down	PREDICTED: NAC domain-containing protein 92-like isoform X2 [Cucumis melo]
CmoCh04G029100	22	6	2.32	0.67	-1.72652	7.39348e-07	1.89302e-06	down	DUF1997 domain-containing protein [Cephalotus follicularis]
CmoCh04G029230	290	21	20.92	1.6	-3.65202	4.47722e-167	1.25654e-165	down	PREDICTED: UPF0301 protein Cpar_0662 [Cucumis melo]
CmoCh04G029500	25	8	3.09	1.05	-1.50195	3.68967e-06	8.9309e-06	down	Transmembrane protein 214 [Glycine soja]
CmoCh04G029560	14	5	0.91	0.34	-1.33671	0.00184169	0.00339263	down	RecName: Full=6-phosphogluconate dehydrogenase, decarboxylating 2, chloroplastic; Flags: Precursor// AAK49897.1 plastidic 6-phosphogluconate dehydrogenase [Spinacia oleracea]
CmoCh04G029740	284	107	10.46	4.14	-1.27929	5.41987e-46	4.86236e-45	down	PREDICTED: thylakoid membrane protein slr0575 [Cucumis melo]
CmoCh04G029850	22	9	5.31	2.35	-1.15098	0.000365855	0.000731179	down	Cytochrome c oxidase biogenesis protein Cmc1-like [Theobroma cacao]
CmoCh04G029920	79	35	9.17	4.31	-1.04392	1.98369e-10	6.36963e-10	down	BnaA04g02530D [Brassica napus]
CmoCh04G030100	5363	2269	320.24	142.63	-1.1129	0	0	down	Poly(A)-binding protein C-terminal interacting protein 6 [Cucumis sativus]
CmoCh04G030160	22	9	0.35	0.15	-1.15098	0.000365855	0.000731179	down	PREDICTED: laccase-12 [Cucumis melo]
CmoCh04G030390	20	5	2.27	0.6	-1.84728	9.67711e-07	2.45637e-06	down	PREDICTED: WUSCHEL-related homeobox 5 [Cucumis melo]
CmoCh04G030520	39	16	12.97	5.83	-1.15145	1.44627e-06	3.62521e-06	down	PREDICTED: protein GUCD1 isoform X1 [Cucumis melo]// XP_008441417.1 PREDICTED: protein GUCD1 isoform X1 [Cucumis melo]// XP_008441418.1 PREDICTED: protein GUCD1 isoform X1 [Cucumis melo]// XP_016899433.1 PREDICTED: protein GUCD1 isoform X1 [Cucumis melo]
CmoCh04G030660	843	370	52.2	24.13	-1.05972	9.72552e-104	1.72926e-102	down	PREDICTED: thylakoid lumenal 15 kDa protein 1, chloroplastic [Cucumis melo]
CmoCh04G030680	1433.08	405.74	22.91	6.78	-1.69115	0	0	down	PREDICTED: ribulose bisphosphate carboxylase/oxygenase activase, chloroplastic [Cucumis melo]// ADN34076.1 ribulose bisphosphate carboxylase/oxygenase activase 1 [Cucumis melo subsp. melo]
CmoCh04G030840	49	16	1.28	0.44	-1.47978	4.03122e-11	1.34472e-10	down	PREDICTED: protein LYK2 [Cucumis melo]
CmoCh04G031090	45	20	1.89	0.88	-1.03747	1.6114e-06	4.02411e-06	down	Phox/Bem1p [Cynara cardunculus var. scolymus]
CmoCh04G031130	179	73	5.65	2.41	-1.16464	8.09013e-26	4.67234e-25	down	PREDICTED: protein NtpR-like [Gossypium hirsutum]
CmoCh04G031280	331	110	46.75	16.56	-1.46029	3.5949e-65	4.2467e-64	down	PREDICTED: trinucleotide repeat-containing gene 18 protein-like [Populus euphratica]
CmoCh05G000030	129	44	6.27	2.25	-1.4213	1.81783e-25	1.03683e-24	down	H0807C06-H0308C08.8 [Oryza sativa Indica Group]
CmoCh05G000040	130.28	34	2	0.55	-1.80325	2.11179e-35	1.54872e-34	down	OSJNBb0026E15.10 [Oryza sativa Japonica Group]
CmoCh05G000130	5	0	48.12	0.001	-5.29651	6.10368e-05	0.00013234	down	JAB1/Mov34/MPN/PAD-1, partial [Cynara cardunculus var. scolymus]
CmoCh05G000170	53	17	2.03	0.68	-1.50586	3.72676e-12	1.30724e-11	down	PREDICTED: type 2 DNA topoisomerase 6 subunit B-like isoform X4 [Cucumis melo]
CmoCh05G000260	15	3	12.28	2.82	-2.15006	5.5513e-06	1.32279e-05	down	-
CmoCh05G000280	26	6	2	0.49	-1.96622	4.82011e-09	1.4258e-08	down	transmembrane protein [Arabidopsis thaliana]// AEE28618.1 transmembrane protein [Arabidopsis thaliana]
CmoCh05G000330	573	174	28.54	9.11	-1.59074	5.27529e-126	1.13318e-124	down	PREDICTED: F-box/kelch-repeat protein At1g23390 [Ziziphus jujuba]
CmoCh05G000420	3	0	1.93	0.001	-4.58381	0.00390629	0.00682066	down	PREDICTED: probable pectinesterase/pectinesterase inhibitor 40 [Cucumis sativus]// KGN62312.1 Invertase/pectin methylesterase inhibitor family protein [Cucumis sativus]
CmoCh05G000500	2	0	0.13	0.001	-4.02862	0.0312501	0.0472645	down	PREDICTED: protein DOWNY MILDEW RESISTANCE 6-like [Ziziphus jujuba]
CmoCh05G000510	10	0	0.62	0.001	-6.27804	3.72569e-09	1.10838e-08	down	PREDICTED: ethylene-responsive transcription factor ESR1 [Cucumis melo]
CmoCh05G000600	11	1	0.26	0.02	-3.18561	4.17743e-07	1.08839e-06	down	PREDICTED: protein terminal ear1-like [Cucumis melo]
CmoCh05G000640	1305.77	557.89	94.61	42.64	-1.09861	1.22789e-169	3.53244e-168	down	PREDICTED: photosystem II core complex proteins psbY, chloroplastic [Cucumis melo]
CmoCh05G000650	535.23	109.11	73.6	15.99	-2.16594	4.08426e-178	1.23423e-176	down	PREDICTED: photosystem II core complex proteins psbY, chloroplastic [Cucumis sativus]
CmoCh05G000700	134	58	3.51	1.59	-1.0785	1.29735e-17	5.76693e-17	down	PREDICTED: two-component response regulator ARR11 [Cucumis melo]
CmoCh05G000790	2	0	1.79	0.001	-4.02862	0.0312501	0.0472645	down	-
CmoCh05G001180	74	25	5.26	1.88	-1.43322	2.85125e-15	1.15508e-14	down	PREDICTED: LOW QUALITY PROTEIN: zinc finger CCCH domain-containing protein 20 [Cucumis melo]
CmoCh05G001190	538	37	9.37	0.67	-3.72967	2.63573960394606e-313	1.45865428684255e-311	down	branched chain amino acid transaminase, partial [Cucumis melo]
CmoCh05G001250	2214	390	39.73	7.32	-2.37671	0	0	down	PREDICTED: LOW QUALITY PROTEIN: AP2-like ethylene-responsive transcription factor ANT [Cucumis melo]
CmoCh05G001280	3737	1693	106.65	50.62	-1.01421	0	0	down	PREDICTED: growth-regulating factor 6-like [Cucumis melo]
CmoCh05G001300	17	7	4.3	1.92	-1.13869	0.00182058	0.00335665	down	PREDICTED: basic leucine zipper 8 [Cucumis melo]
CmoCh05G001560	2792	911	265	91.53	-1.48761	0	0	down	PREDICTED: peamaclein-like [Juglans regia]
CmoCh05G001820	40	1	0.2	0.01	-5.03579	1.28142e-29	8.21113e-29	down	PREDICTED: glutamate receptor 2.3-like [Cucumis sativus]
CmoCh05G001850	10	4	0.38	0.16	-1.17014	0.0195211	0.0309838	down	PREDICTED: abscisic acid 8'-hydroxylase 4-like [Cucumis sativus]
CmoCh05G002010	9.34	3.41	3.31	1.33	-1.42136	0.0113314	0.0186121	down	Contains similarity to Chlamydia outer membrane protein, related [Medicago truncatula]
CmoCh05G002090	26.44	0	0.66	0.001	-7.64506	5.2978e-23	2.81596e-22	down	OSJNBb0026E15.10 [Oryza sativa Japonica Group]
CmoCh05G002110	2	0	0.08	0.001	-4.02862	0.0312501	0.0472645	down	phloem serpin-1 [Cucurbita maxima]
CmoCh05G002130	2	0	0.1	0.001	-4.02862	0.0312501	0.0472645	down	phloem serpin-1 [Cucurbita maxima]
CmoCh05G002140	3	0	1.06	0.001	-4.58381	0.00390629	0.00682066	down	phloem serpin-1 [Cucurbita maxima]
CmoCh05G002150	6	0	0.24	0.001	-5.55341	1.52593e-05	3.49815e-05	down	phloem serpin-1 [Cucurbita maxima]
CmoCh05G002160	362	54	34.57	5.46	-2.61425	4.74933e-151	1.20749e-149	down	PREDICTED: dof zinc finger protein DOF1.6-like [Cucumis melo]
CmoCh05G002180	54	22	3.3	1.42	-1.16309	1.05231e-08	3.0512e-08	down	PREDICTED: B3 domain-containing protein REM16-like [Cucumis melo]
CmoCh05G002200	5	1	0.84	0.18	-2.06827	0.012726	0.0207238	down	PREDICTED: probable transcription factor KAN4 [Cucumis melo]
CmoCh05G002440	170	65	9.14	3.67	-1.25744	1.6811e-27	1.02096e-26	down	hypothetical protein Csa_2G361610 [Cucumis sativus]
CmoCh05G002480	49	22	4.89	2.32	-1.02326	1.15652e-06	2.91857e-06	down	PREDICTED: 5'-nucleotidase domain-containing protein 4 isoform X1 [Cucumis melo]
CmoCh05G002530	15	0	0.42	0.001	-6.85679	1.13715e-13	4.30433e-13	down	PREDICTED: long-chain-fatty-acid--AMP ligase FadD29-like [Gossypium arboreum]
CmoCh05G002570	28	12	4.28	1.96	-1.08677	0.000100603	0.000213082	down	PREDICTED: cyclin-dependent kinase inhibitor 1C [Vitis vinifera]
CmoCh05G002870	254	20	14.26	1.18	-3.53087	9.41945e-143	2.27719e-141	down	PREDICTED: protein SHI RELATED SEQUENCE 5-like [Cucumis melo]
CmoCh05G003000	15	1	9	0.68	-3.62855	2.46526e-10	7.86919e-10	down	PREDICTED: auxin-induced protein 15A-like [Cucumis melo]
CmoCh05G003310	1220	67	22.5	1.29	-4.05612	0	0	down	PREDICTED: phospholipase D delta-like [Cucumis melo]
CmoCh05G003340	27	7	4.98	1.39	-1.80204	3.55346e-08	9.95257e-08	down	-
CmoCh05G003520	371	142	8.93	3.58	-1.25678	3.29097e-58	3.55682e-57	down	PREDICTED: BTB/POZ domain-containing protein NPY1 [Cucumis melo]// XP_008445265.1 PREDICTED: BTB/POZ domain-containing protein NPY1 [Cucumis melo]
CmoCh05G003620	143	30	10.1	2.23	-2.12052	1.24867e-47	1.14864e-46	down	PREDICTED: ethylene-responsive transcription factor ERF003-like [Cucumis melo]
CmoCh05G003690	87	5	28.94	1.82	-3.96107	5.81495e-54	5.87033e-53	down	BnaCnng20090D [Brassica napus]
CmoCh05G003720	38	11	1.38	0.42	-1.64982	3.1901e-10	1.01196e-09	down	PREDICTED: flotillin-like protein 4 [Cucumis melo]
CmoCh05G003820	74	32	1.98	0.89	-1.07858	2.7991e-10	8.91315e-10	down	NT-C2 domain-containing protein [Cephalotus follicularis]
CmoCh05G004220	43	6	2.93	0.43	-2.68919	9.36027e-20	4.48876e-19	down	PREDICTED: monoacylglycerol lipase ABHD6-like [Cucumis melo]
CmoCh05G004230	189	51	8.3	2.35	-1.7594	5.58327e-49	5.24812e-48	down	PREDICTED: suppressor protein SRP40 [Theobroma cacao]
CmoCh05G004270	137	39	5.75	1.72	-1.68155	8.22194e-34	5.82661e-33	down	PREDICTED: thermospermine synthase ACAULIS5 [Cucumis melo]
CmoCh05G004560	473	69.76	22.37	3.47	-2.62631	1.29982e-197	4.37934e-196	down	PREDICTED: 2-alkenal reductase (NADP(+)-dependent)-like [Cucumis melo]
CmoCh05G004790	1086	435	28.16	11.81	-1.19167	4.95746e-162	1.34212e-160	down	PREDICTED: cytochrome P450 78A5 [Cucumis melo]
CmoCh05G004910	54	13	3.39	0.86	-1.91669	1.28026e-16	5.47801e-16	down	PREDICTED: probable carboxylesterase 15 [Cucumis melo]
CmoCh05G005040	389	135	9.8	3.56	-1.39798	2.56882e-71	3.29134e-70	down	PREDICTED: auxin response factor 17 [Cucumis melo]
CmoCh05G005160	12	5	0.7	0.3	-1.11654	0.0109741	0.0180619	down	PREDICTED: F-box protein At1g22220 [Cucumis melo]
CmoCh05G005290	194	31	10.77	1.81	-2.5131	2.11498e-78	2.95432e-77	down	PREDICTED: RNA-binding protein 38-like [Cucumis melo]
CmoCh05G005400	16	6	1.59	0.63	-1.27028	0.00109019	0.00205623	down	PREDICTED: blue copper protein-like [Cucumis melo]
CmoCh05G005440	36	5	1.98	0.29	-2.69111	5.50398e-17	2.38844e-16	down	PREDICTED: RING-H2 finger protein ATL11-like [Cucumis melo]
CmoCh05G005550	1896	501	195.39	54.72	-1.79179	0	0	down	PREDICTED: zinc-finger homeodomain protein 2 [Cucumis melo]
CmoCh05G005790	34000	13970	1033.31	444.93	-1.15515	0	0	down	PREDICTED: aspartyl protease AED3 [Cucumis melo]
CmoCh05G005920	806	295	16.26	6.23	-1.32167	2.79526e-143	6.79342e-142	down	Zinc finger family protein [Theobroma cacao]
CmoCh05G006010	6	0	1.59	0.001	-5.55341	1.52593e-05	3.49815e-05	down	PREDICTED: oleosin 1-like [Cucumis melo]
CmoCh05G006060	5	0	0.14	0.001	-5.29651	6.10368e-05	0.00013234	down	PREDICTED: protein cereblon [Cucumis melo]
CmoCh05G006240	14	0	0.45	0.001	-6.75814	9.0969e-13	3.29796e-12	down	PREDICTED: protein EMBRYONIC FLOWER 1-like isoform X1 [Cucumis melo]
CmoCh05G006750	9	3	3.12	1.14	-1.42136	0.0113314	0.0186121	down	-
CmoCh05G006880	5	0	0.99	0.001	-5.29651	6.10368e-05	0.00013234	down	Os05g0575000, partial [Oryza sativa Japonica Group]
CmoCh05G006940	46	19	36.08	17.09	-1.14264	1.57518e-07	4.22583e-07	down	PREDICTED: transcription factor UPBEAT1-like [Nicotiana tomentosiformis]
CmoCh05G006980	37	14	6.75	2.74	-1.26688	5.29254e-07	1.36844e-06	down	PREDICTED: RING-H2 finger protein ATL56 [Cucumis melo]
CmoCh05G006990	7	0	0.22	0.001	-5.77141	1.90744e-06	4.7317e-06	down	PREDICTED: 4-coumarate--CoA ligase 2-like [Cucumis melo]
CmoCh05G007000	15	6	0.96	0.4	-1.17795	0.0031563	0.00564488	down	PREDICTED: CASP-like protein 2C1 [Cucumis melo]
CmoCh05G007140	469	206	23.95	11.06	-1.05847	3.87254e-56	4.04116e-55	down	PREDICTED: zinc finger protein CONSTANS-LIKE 5-like [Cucumis melo]
CmoCh05G007810	20	2	2.37	0.25	-3.11958	4.27195e-11	1.42364e-10	down	PREDICTED: LOB domain-containing protein 6 [Cucumis melo]// XP_008441921.1 PREDICTED: LOB domain-containing protein 6 [Cucumis melo]// XP_008441922.1 PREDICTED: LOB domain-containing protein 6 [Cucumis melo]
CmoCh05G008270	11.64	3.42	0.48	0.15	-1.83124	0.000247108	0.000502086	down	PREDICTED: chromatin assembly factor 1 subunit FAS1 isoform X1 [Cucumis sativus]
CmoCh05G008310	6	0	0.57	0.001	-5.55341	1.52593e-05	3.49815e-05	down	Retrovirus-related Pol polyprotein from transposon TNT 1-94 [Cajanus cajan]
CmoCh05G008780	704.04	307.17	12.54	5.72	-1.069	3.22455e-88	5.00387e-87	down	PREDICTED: phosphate transporter PHO1 homolog 3-like [Cucumis melo]
CmoCh05G009160	2	0	0.06	0.001	-4.02862	0.0312501	0.0472645	down	PREDICTED: formin-like protein 4 [Cucumis melo]
CmoCh05G009170	103	0	2.86	0.001	-9.62573	2.25711e-86	3.4311e-85	down	PREDICTED: formin-like protein 4 [Cucumis melo]
CmoCh05G009960	21026	9171	624.43	285.39	-1.06897	0	0	down	RecName: Full=Catalase isozyme 2// BAA09507.1 catalase [Cucurbita pepo]
CmoCh05G010120	392	135	28.23	10.25	-1.40906	9.18199e-73	1.19535e-71	down	NADH-ubiquinone oxidoreductase chain 5 [Gossypium arboreum]
CmoCh05G010420	536	244	25.25	12.08	-1.00696	5.2214e-59	5.70812e-58	down	PREDICTED: F-box protein SKIP1 [Cucumis melo]
CmoCh05G010540	6.08	0	2.31	0.001	-5.55341	1.52593e-05	3.49815e-05	down	ribosomal protein S12 (chloroplast) [Ipomoea batatas]// YP_009128460.1 ribosomal protein S12 (chloroplast) [Ipomoea batatas]// AJP09609.1 ribosomal protein S12 (chloroplast) [Ipomoea batatas]// AJP09632.1 ribosomal protein S12 (chloroplast) [Ipomoea batatas]
CmoCh05G010620	72	3	4.31	0.19	-4.4032	1.42903e-48	1.33551e-47	down	PREDICTED: transcription factor MYB86-like [Cucumis melo]
CmoCh05G010630	1051	413	15.49	6.36	-1.21927	5.75433e-163	1.56554e-161	down	PREDICTED: transcription factor PIF3 isoform X1 [Cucumis melo]
CmoCh05G010700	41	14	12.59	4.69	-1.41448	9.74344e-09	2.8302e-08	down	PREDICTED: protein NIM1-INTERACTING 3 [Theobroma cacao]
CmoCh05G010810	25	8	1.5	0.5	-1.50195	3.68967e-06	8.9309e-06	down	PREDICTED: probable pectinesterase 66 [Cucumis melo]
CmoCh05G010920	114	33	9.92	3.03	-1.65689	7.82959e-28	4.78881e-27	down	PREDICTED: universal stress protein A-like protein isoform X2 [Cucumis sativus]
CmoCh05G011250	6553	204	148.78	4.85	-4.87666	0	0	down	PREDICTED: linoleate 9S-lipoxygenase 6-like [Cucumis sativus]
CmoCh05G011420	72	8	2.67	0.31	-3.02311	4.77855e-36	3.55841e-35	down	PREDICTED: (R)-mandelonitrile lyase 1-like [Cucumis melo]
CmoCh05G011580	85	19	3.1	0.73	-2.02659	1.74207e-27	1.05729e-26	down	PREDICTED: mevalonate kinase-like [Cucumis melo]
CmoCh05G011630	65	16	3.47	0.9	-1.88649	2.91868e-19	1.37338e-18	down	PREDICTED: E3 ubiquitin-protein ligase ATL6 [Cucumis sativus]
CmoCh05G011690	2	0	0.08	0.001	-4.02862	0.0312501	0.0472645	down	PREDICTED: GDSL esterase/lipase At1g54790-like [Cucumis melo]
CmoCh05G011780	20.07	8.02	0.33	0.14	-1.18189	0.000378397	0.000755041	down	gag/pol polyprotein - maize retrotransposon Hopscotch// AAA57005.1 copia-like retrotransposon Hopscotch polyprotein [Zea mays]
CmoCh05G011870	58	11	1.55	0.31	-2.25817	1.39468e-21	7.10227e-21	down	PREDICTED: receptor-like cytosolic serine/threonine-protein kinase RBK2 [Cucumis melo]
CmoCh05G011930	3.1	0	0.39	0.001	-4.58381	0.00390629	0.00682066	down	PREDICTED: protein DDI1 homolog [Elaeis guineensis]
CmoCh05G012150	7	1	0.95	0.14	-2.54317	0.000488299	0.000958718	down	PREDICTED: protein IQ-DOMAIN 14-like [Malus domestica]
CmoCh05G012350	3	0	0.06	0.001	-4.58381	0.00390629	0.00682066	down	PREDICTED: receptor-like protein kinase ANXUR2 [Cucumis melo]
CmoCh05G012510	2646.03	957.49	148.01	56.35	-1.33907	0	0	down	PREDICTED: GRF1-interacting factor 1 [Cucumis melo]
CmoCh05G013040	5	1	0.3	0.06	-2.06827	0.012726	0.0207238	down	PREDICTED: blue copper protein-like [Cucumis melo]
CmoCh05G013080	18	4	1.26	0.3	-2.00985	1.16904e-06	2.94882e-06	down	PREDICTED: axial regulator YABBY 5-like [Cucumis sativus]
CmoCh05G013220	1051	350	36.59	12.78	-1.45798	1.13707e-218	4.27525e-217	down	PREDICTED: protein kinase PINOID 2 [Cucumis sativus]
CmoCh05G013640	29	13	1.12	0.52	-1.02278	0.00015017	0.000312567	down	PREDICTED: sugar transport protein 14 isoform X2 [Cucumis sativus]
CmoCh05G013790	19268	4221	1179.11	271.99	-2.06248	0	0	down	PREDICTED: acid phosphatase 1-like [Cucumis melo]
CmoCh05G013800	1690	191	88.71	10.54	-3.01655	0	0	down	PREDICTED: acid phosphatase 1-like [Cucumis melo]
CmoCh05G014170	506	189	21.38	8.39	-1.29217	4.20239e-82	6.05742e-81	down	PREDICTED: growth-regulating factor 6-like isoform X3 [Cucumis melo]
CmoCh05G014210	849	354	33.84	14.81	-1.13371	5.66772e-117	1.12863e-115	down	PREDICTED: guanine nucleotide-binding protein subunit gamma 3-like [Cucumis melo]
CmoCh05G014230	1041	407	40.39	16.57	-1.22659	4.77459e-163	1.30027e-161	down	PREDICTED: protein STRICTOSIDINE SYNTHASE-LIKE 4-like isoform X2 [Cucumis melo]
CmoCh06G000120	426.92	47.55	27.15	3.19	-3.02194	1.21273e-206	4.32377e-205	down	PREDICTED: protein STRICTOSIDINE SYNTHASE-LIKE 2 [Cucumis melo]
CmoCh06G000130	125.96	22.94	5.42	1.04	-2.3197	8.08879e-47	7.3452e-46	down	PREDICTED: protein STRICTOSIDINE SYNTHASE-LIKE 2 [Cucumis melo]
CmoCh06G000150	19.41	7.46	0.91	0.37	-1.298	0.000216835	0.000442894	down	PREDICTED: TGACG-sequence-specific DNA-binding protein TGA-2.1 [Nicotiana tomentosiformis]
CmoCh06G000170	355	91	12.83	3.45	-1.83448	1.05155e-95	1.74477e-94	down	PREDICTED: cytochrome P450 94A1-like [Cucumis melo]
CmoCh06G000180	6	0	0.27	0.001	-5.55341	1.52593e-05	3.49815e-05	down	PREDICTED: WAT1-related protein At5g07050-like [Cucumis melo]// ADN33889.1 nodulin-like protein [Cucumis melo subsp. melo]
CmoCh06G000260	516	111	13.55	3.05	-2.08758	4.66889e-164	1.28546e-162	down	PREDICTED: protein NRT1/ PTR FAMILY 3.1-like [Cucumis melo]
CmoCh06G000810	11	2	0.18	0.03	-2.26472	7.02604e-05	0.000151291	down	PREDICTED: protein STRUBBELIG-RECEPTOR FAMILY 2 [Cucumis sativus]
CmoCh06G000850	42.79	17.46	1.83	0.78	-1.20503	1.62626e-07	4.35777e-07	down	-
CmoCh06G000990	119	43	3.23	1.22	-1.33809	1.36754e-21	6.96664e-21	down	PREDICTED: probable L-type lectin-domain containing receptor kinase S.5 [Cucumis melo]
CmoCh06G001000	26	8	1.86	0.6	-1.55824	1.11585e-06	2.81928e-06	down	WRC domain-containing protein [Cephalotus follicularis]
CmoCh06G001020	12	4	0.69	0.24	-1.43008	0.00208824	0.00382252	down	PREDICTED: homeobox-leucine zipper protein HOX11 isoform X1 [Juglans regia]
CmoCh06G001190	38	1	29.8	0.9	-4.96204	6.67334e-28	4.08523e-27	down	-
CmoCh06G001570	1862	174	69.31	6.79	-3.29076	0	0	down	PREDICTED: uncharacterized transporter YBR287W-like isoform X2 [Cucumis melo]
CmoCh06G001630	2	0	6.77	0.001	-4.02862	0.0312501	0.0472645	down	PREDICTED: serine/threonine-protein phosphatase 7 isoform X3 [Cucumis melo]
CmoCh06G001830	122	29	4.51	1.12	-1.94033	1.03304e-36	7.80659e-36	down	50S ribosomal protein L35 [Cucumis sativus]
CmoCh06G001930	5	1	0.2	0.04	-2.06827	0.012726	0.0207238	down	PREDICTED: alanine--glyoxylate aminotransferase 2 homolog 3, mitochondrial [Cucumis melo]
CmoCh06G002100	274	103	5.95	2.34	-1.28251	8.62781e-45	7.57028e-44	down	pyruvate decarboxylase 1 [Cucumis melo]// AIC36754.1 pyruvate/alpha-keto acid decarboxylase [Cucumis melo]
CmoCh06G002270	3	0	0.47	0.001	-4.58381	0.00390629	0.00682066	down	-
CmoCh06G002450	2	0	3.25	0.001	-4.02862	0.0312501	0.0472645	down	-
CmoCh06G002650	20	9	2.82	1.36	-1.01432	0.0024797	0.00449934	down	HSP22.8 [Citrullus lanatus]
CmoCh06G002730	3	0	0.07	0.001	-4.58381	0.00390629	0.00682066	down	Apple-like protein [Cynara cardunculus var. scolymus]
CmoCh06G003010	1313	346	98.33	27.34	-1.79563	0	0	down	Ank domain-containing protein/Ank_2 domain-containing protein/Ank_5 domain-containing protein [Cephalotus follicularis]
CmoCh06G003020	375	115	39.69	12.91	-1.57622	5.85121e-82	8.42965e-81	down	XB3 in [Theobroma cacao]
CmoCh06G003200	93	30	3.05	1.03	-1.50052	4.23563e-20	2.05916e-19	down	PREDICTED: type I inositol polyphosphate 5-phosphatase 8 isoform X1 [Cucumis melo]// XP_008442580.1 PREDICTED: type I inositol polyphosphate 5-phosphatase 8 isoform X1 [Cucumis melo]
CmoCh06G003320	65	21	13.19	4.58	-1.49672	1.81685e-14	7.13586e-14	down	-
CmoCh06G003330	13	1	1.62	0.13	-3.42401	1.04808e-08	3.03991e-08	down	PREDICTED: claspin-like [Nicotiana tabacum]
CmoCh06G003370	18	1	1	0.06	-3.88951	1.10113e-11	3.775e-11	down	PREDICTED: glutathione S-transferase L3-like [Cucumis melo]
CmoCh06G003480	503	219	9.08	4.14	-1.07117	4.54231e-61	5.10964e-60	down	PREDICTED: probable DNA helicase MCM8 isoform X1 [Cucumis melo]
CmoCh06G003530	358.99	99	10.02	2.89	-1.72923	2.87883e-89	4.50543e-88	down	PREDICTED: protein IQ-DOMAIN 1-like isoform X1 [Cucumis sativus]
CmoCh06G003600	2	0	1.02	0.001	-4.02862	0.0312501	0.0472645	down	PREDICTED: uncharacterized protein LOC105434959 [Cucumis sativus]// KGN58946.1 hypothetical protein Csa_3G736930 [Cucumis sativus]
CmoCh06G003620	417	175	18.06	7.96	-1.12412	7.19782e-55	7.37443e-54	down	DNA-binding protein S1FA1 [Morus notabilis]// EXB98562.1 DNA-binding protein S1FA1 [Morus notabilis]
CmoCh06G003650	420	36.99	11.9	1.1	-3.37255	1.90477e-225	7.33178e-224	down	PREDICTED: protein indeterminate-domain 9 [Cucumis melo]
CmoCh06G003710	2	0	0.14	0.001	-4.02862	0.0312501	0.0472645	down	PREDICTED: probable aquaporin PIP2-4 [Cucumis melo]
CmoCh06G003800	795	309	34.6	14.12	-1.23499	2.10292e-126	4.5314e-125	down	PREDICTED: OTU domain-containing protein DDB_G0284757 isoform X3 [Cucumis melo]
CmoCh06G003980	3	0	0.56	0.001	-4.58381	0.00390629	0.00682066	down	PREDICTED: tankyrase-2 [Cucumis melo]
CmoCh06G004020	18	4	1.29	0.3	-2.00985	1.16904e-06	2.94882e-06	down	PREDICTED: thaumatin-like protein 1 [Gossypium hirsutum]
CmoCh06G004030	96	23	3.82	0.96	-1.92785	6.40004e-29	4.0335e-28	down	PREDICTED: UDP-glycosyltransferase 73C1-like [Cucumis melo]
CmoCh06G004040	147	36	3.42	0.88	-1.89821	2.11188e-42	1.77288e-41	down	PREDICTED: UDP-glycosyltransferase 73C2-like isoform X1 [Cucumis melo]
CmoCh06G004060	7	0	0.32	0.001	-5.77141	1.90744e-06	4.7317e-06	down	PREDICTED: UDP-glycosyltransferase 73C2-like isoform X1 [Cucumis melo]
CmoCh06G004140	5	1	0.28	0.06	-2.06827	0.012726	0.0207238	down	PREDICTED: protein DMR6-LIKE OXYGENASE 1 [Cucumis melo]
CmoCh06G004330	3	0	0.11	0.001	-4.58381	0.00390629	0.00682066	down	DUF3475 domain protein, partial [Medicago truncatula]// KEH16122.1 DUF3475 domain protein, partial [Medicago truncatula]
CmoCh06G004480	234	41	117	22.92	-2.38138	3.21131e-88	4.98612e-87	down	PREDICTED: phytosulfokines 5-like [Cucumis sativus]
CmoCh06G004560	376	152	12.31	5.21	-1.17799	1.87722e-53	1.87858e-52	down	PREDICTED: zinc-regulated protein 8-like [Nicotiana tomentosiformis]
CmoCh06G004640	359	29	5.74	0.48	-3.49641	9.55912e-199	3.24845e-197	down	General transcription factor 3C polypeptide 2 [Gossypium arboreum]
CmoCh06G004650	47	17	1.53	0.58	-1.33298	2.38859e-09	7.18821e-09	down	PREDICTED: cytochrome P450 94C1-like [Cucumis melo]
CmoCh06G004710	315	77	10.34	2.65	-1.90274	1.43333e-89	2.25085e-88	down	bZIP1 [Citrullus lanatus]
CmoCh06G005070	46	7	8.2	1.34	-2.56784	5.13332e-20	2.48418e-19	down	PREDICTED: transcription repressor OFP6-like [Cucumis melo]
CmoCh06G005160	11.23	0	0.68	0.001	-6.41385	4.65722e-10	1.46204e-09	down	PREDICTED: protein YLS9 [Cucumis sativus]// KGN59196.1 Hairpin-inducing protein [Cucumis sativus]
CmoCh06G005170	46.77	3	5.39	0.37	-3.78925	2.14333e-29	1.36768e-28	down	PREDICTED: protein YLS9 [Cucumis sativus]// KGN59196.1 Hairpin-inducing protein [Cucumis sativus]
CmoCh06G005210	7	2	0.93	0.28	-1.62228	0.00935554	0.0155574	down	PREDICTED: nudix hydrolase 26, chloroplastic-like [Cucumis melo]
CmoCh06G005240	15	1	0.55	0.04	-3.62855	2.46526e-10	7.86919e-10	down	PREDICTED: aluminum-activated malate transporter 8-like [Cucumis melo]
CmoCh06G005260	47	4	2.28	0.2	-3.38809	2.79817e-26	1.63766e-25	down	PREDICTED: E3 ubiquitin-protein ligase PUB23-like [Cucumis melo]
CmoCh06G005330	14.75	2.16	0.87	0.13	-2.70766	2.09903e-07	5.58875e-07	down	PREDICTED: nuclear transcription factor Y subunit A-10 [Cucumis melo]// XP_008442936.1 PREDICTED: nuclear transcription factor Y subunit A-10 [Cucumis melo]
CmoCh06G005490	16	5	3.49	1.17	-1.52769	0.000176348	0.000363783	down	BnaAnng09550D [Brassica napus]
CmoCh06G005540	241.09	106.38	3.45	1.59	-1.05608	1.45925e-29	9.33756e-29	down	PREDICTED: ABC transporter G family member 22 isoform X2 [Cucumis melo]
CmoCh06G005560	10	3	0.27	0.09	-1.5713	0.00337801	0.00601043	down	Calcium-binding EF-hand, partial [Cynara cardunculus var. scolymus]
CmoCh06G005800	296	64	14.47	3.29	-2.07936	2.15749e-94	3.533e-93	down	PREDICTED: thaumatin-like protein 1 [Cucumis melo]// ADN33946.1 zeamatin precursor [Cucumis melo subsp. melo]
CmoCh06G005960	294	56	5.34	1.06	-2.26184	6.94952e-104	1.23887e-102	down	PREDICTED: transcription factor bHLH157 [Prunus mume]
CmoCh06G006400	5	1	1.02	0.22	-2.06827	0.012726	0.0207238	down	PREDICTED: probable calcium-binding protein CML18 [Cucumis melo]
CmoCh06G006740	396	124	24.3	8.01	-1.54621	2.3997e-84	3.5576e-83	down	PREDICTED: probable calcium-binding protein CML21 [Cucumis melo]
CmoCh06G006860	327	128	9.58	3.93	-1.22434	1.90739e-49	1.80707e-48	down	PREDICTED: inactive beta-amylase 4, chloroplastic [Cucumis melo]
CmoCh06G006960	13	0	0.52	0.001	-6.65225	7.2773e-12	2.5171e-11	down	PREDICTED: caffeic acid 3-O-methyltransferase [Cucumis sativus]
CmoCh06G006980	3	0	0.11	0.001	-4.58381	0.00390629	0.00682066	down	PREDICTED: caffeic acid 3-O-methyltransferase-like [Cucumis melo]
CmoCh06G007040	11	4	5.61	2.28	-1.30596	0.00660914	0.0111994	down	BnaA08g00330D [Brassica napus]
CmoCh06G007220	507	172	8.79	3.12	-1.43091	9.46833e-96	1.57292e-94	down	NB-ARC domain-containing protein [Cephalotus follicularis]
CmoCh06G007370	29	13	1.66	0.78	-1.02278	0.00015017	0.000312567	down	PREDICTED: disease resistance protein RGA2-like [Cucumis melo]
CmoCh06G007460	263	99	3.68	1.45	-1.2805	5.5082e-43	4.67095e-42	down	DUF810 domain-containing protein [Cephalotus follicularis]
CmoCh06G007470	23	5	19.67	4.93	-2.0477	1.38932e-08	3.99935e-08	down	PREDICTED: E3 ubiquitin-protein ligase At1g12760-like [Cucumis melo]
CmoCh06G007770	844	309	16.31	6.25	-1.32126	7.25165e-150	1.83018e-148	down	PREDICTED: somatic embryogenesis receptor kinase 1 [Cucumis melo]
CmoCh06G007910	1585	519	40.54	13.9	-1.48242	0	0	down	PREDICTED: protein NRT1/ PTR FAMILY 6.3-like [Cucumis melo]
CmoCh06G007920	7	0	2.19	0.001	-5.77141	1.90744e-06	4.7317e-06	down	PREDICTED: 14 kDa proline-rich protein DC2.15-like [Cucumis melo]
CmoCh06G008020	134	15	3.72	0.44	-3.02112	6.97227e-66	8.33286e-65	down	Glycogenin-2 [Gossypium arboreum]
CmoCh06G008250	71	25	4.13	1.53	-1.37362	8.19265e-14	3.12252e-13	down	PREDICTED: ethylene-responsive transcription factor 5 [Cucumis melo]
CmoCh06G008260	194	76	15.11	6.25	-1.22265	7.77162e-30	5.00668e-29	down	ethylene responsive transcription factor 1a [Citrullus lanatus subsp. vulgaris]
CmoCh06G008550	120	37	17.75	5.84	-1.56631	3.31944e-27	1.99921e-26	down	senescence-associated family protein [Populus trichocarpa]// ERP63191.1 senescence-associated family protein [Populus trichocarpa]
CmoCh06G008760	5	1	0.83	0.18	-2.06827	0.012726	0.0207238	down	PREDICTED: transcriptional regulator SUPERMAN-like [Cucumis melo]
CmoCh06G008950	38	15	7.36	3.12	-1.2065	8.92878e-07	2.27344e-06	down	PREDICTED: ethylene-responsive transcription factor 3 [Cucumis melo]
CmoCh06G009320	209	44	19.06	4.25	-2.11688	8.18894e-69	1.02075e-67	down	hypothetical protein Csa_3G822320 [Cucumis sativus]
CmoCh06G009860	14	6	1.15	0.52	-1.0793	0.00864201	0.0144497	down	PREDICTED: metalloendoproteinase 4-MMP [Cucumis melo]
CmoCh06G010150	27	12	21.17	10.79	-1.03455	0.000258316	0.000523893	down	Auxin responsive SAUR protein [Corchorus olitorius]
CmoCh06G010230	9.34	0	0.48	0.001	-6.1281	2.98049e-08	8.38956e-08	down	PREDICTED: AAA-ATPase At2g46620 [Cucumis melo]
CmoCh06G010560	2960	422	70.27	10.49	-2.6819	0	0	down	PREDICTED: jasmonic acid-amido synthetase JAR1 [Cucumis melo]// XP_008437925.1 PREDICTED: jasmonic acid-amido synthetase JAR1 [Cucumis melo]// XP_016899070.1 PREDICTED: jasmonic acid-amido synthetase JAR1 [Cucumis melo]// ADN34174.1 auxin-regulated protein [Cucumis melo subsp. melo]
CmoCh06G010710	16	4	3.15	0.85	-1.84123	1.91705e-05	4.35926e-05	down	Arabinogalactan protein 20 [Theobroma cacao]
CmoCh06G011430	59	15	4.38	1.17	-1.83946	2.21472e-17	9.77697e-17	down	PREDICTED: MADS-box protein SOC1 [Cucumis sativus]
CmoCh06G011550	99	9	8.29	0.8	-3.31427	8.29065e-54	8.33602e-53	down	PREDICTED: AT-hook motif nuclear-localized protein 22-like [Cucumis sativus]
CmoCh06G011700	10.83	0	0.52	0.001	-6.41385	4.65722e-10	1.46204e-09	down	Nitroreductase-like protein [Cynara cardunculus var. scolymus]
CmoCh06G012160	47	21	2.86	1.35	-1.03005	1.45701e-06	3.65114e-06	down	PREDICTED: E3 ubiquitin-protein ligase ATL4 [Cucumis melo]
CmoCh06G012300	3	0	0.18	0.001	-4.58381	0.00390629	0.00682066	down	Nucleotide-diphospho-sugar transferase [Corchorus olitorius]
CmoCh06G012600	5	0	0.59	0.001	-5.29651	6.10368e-05	0.00013234	down	PREDICTED: glycine-rich cell wall structural protein-like [Cucumis melo]
CmoCh06G012750	14	3	2.05	0.47	-2.05141	1.47395e-05	3.39452e-05	down	Inosine triphosphate pyrophosphatase [Morus notabilis]// EXC11271.1 Inosine triphosphate pyrophosphatase [Morus notabilis]
CmoCh06G012870	20	9	0.91	0.43	-1.01432	0.0024797	0.00449934	down	PREDICTED: probable indole-3-pyruvate monooxygenase YUCCA3 [Cucumis melo]
CmoCh06G013120	127	50	3.87	1.6	-1.21483	5.85132e-20	2.82569e-19	down	PREDICTED: protein NRT1/ PTR FAMILY 5.2-like [Cucumis melo]
CmoCh06G013160	151	50	3.37	1.17	-1.46431	1.68353e-30	1.10314e-29	down	PREDICTED: phosphate transporter PHO1 [Cucumis melo]
CmoCh06G013250	3	0	0.29	0.001	-4.58381	0.00390629	0.00682066	down	hypothetical protein Csa_3G134950 [Cucumis sativus]
CmoCh06G013290	7.97	1	0.27	0.04	-2.73251	8.79809e-05	0.000187486	down	PREDICTED: pre-mRNA-splicing factor SLU7 [Cucumis melo]
CmoCh06G013400	8	2	0.43	0.11	-1.81162	0.00231579	0.00421803	down	PREDICTED: 1-aminocyclopropane-1-carboxylate oxidase homolog 1-like [Cucumis melo]
CmoCh06G013430	29.17	7.16	2.2	0.57	-1.90465	2.40319e-09	7.22662e-09	down	PREDICTED: enoyl-CoA delta isomerase 2, peroxisomal-like [Cucumis melo]
CmoCh06G013470	11	3	2.58	0.76	-1.70712	0.000940733	0.0017873	down	PREDICTED: zinc finger protein KNUCKLES-like [Cucumis sativus]
CmoCh06G013530	39	15	5.77	2.37	-1.24385	3.19479e-07	8.39036e-07	down	PREDICTED: DNA-directed RNA polymerase V subunit 7-like [Cucumis melo]// XP_008438586.1 PREDICTED: DNA-directed RNA polymerase V subunit 7-like [Cucumis melo]
CmoCh06G013680	6	1	0.59	0.1	-2.32517	0.00257689	0.00466403	down	-
CmoCh06G013720	10	2	0.36	0.08	-2.1289	0.00011685	0.000246169	down	PREDICTED: serine-aspartate repeat-containing protein F isoform X3 [Cucumis melo]
CmoCh06G013820	760	215	54.31	16.2	-1.69307	5.76472e-182	1.78914e-180	down	PREDICTED: early light-induced protein 1, chloroplastic [Cucumis melo]
CmoCh06G013860	12	0	13.75	0.001	-6.53797	5.82167e-11	1.92658e-10	down	PREDICTED: EPIDERMAL PATTERNING FACTOR-like protein 4 [Sesamum indicum]
CmoCh06G013880	161	62	5.12	2.07	-1.24707	6.65192e-26	3.86032e-25	down	PREDICTED: protein IQ-DOMAIN 14 [Cucumis melo]
CmoCh06G014340	398	26	17.83	1.22	-3.802	3.79983e-236	1.54687e-234	down	PREDICTED: basic 7S globulin-like [Cucumis melo]
CmoCh06G015010	39	17	3.96	1.83	-1.06462	5.81673e-06	1.38341e-05	down	PREDICTED: universal stress protein PHOS32 [Musa acuminata subsp. malaccensis]
CmoCh06G015250	2	0	0.25	0.001	-4.02862	0.0312501	0.0472645	down	PREDICTED: LOW QUALITY PROTEIN: pectinesterase-like [Cucumis melo]
CmoCh06G015360	26	8	1.18	0.38	-1.55824	1.11585e-06	2.81928e-06	down	PREDICTED: exopolygalacturonase-like [Cucumis melo]
CmoCh06G015380	2	0	15.64	0.001	-4.02862	0.0312501	0.0472645	down	-
CmoCh06G015670	6	0	0.89	0.001	-5.55341	1.52593e-05	3.49815e-05	down	PREDICTED: galactokinase [Elaeis guineensis]
CmoCh06G015780	2	0	0.21	0.001	-4.02862	0.0312501	0.0472645	down	PREDICTED: 1-Cys peroxiredoxin [Cucumis melo]
CmoCh06G016190	291	121	12.59	5.5	-1.13719	1.48915e-39	1.18002e-38	down	PREDICTED: pirin-like protein [Cucumis sativus]
CmoCh06G016310	145.2	24.42	2.81	0.49	-2.46104	1.11401e-57	1.19185e-56	down	PREDICTED: extensin-2-like, partial [Cucumis melo]
CmoCh06G016680	193	66	5.15	1.84	-1.41839	5.76394e-37	4.37736e-36	down	PREDICTED: exocyst complex component EXO70B1 [Cucumis sativus]
CmoCh06G016760	7	1	5.27	0.86	-2.54317	0.000488299	0.000958718	down	-
CmoCh06G016970	2	0	2.56	0.001	-4.02862	0.0312501	0.0472645	down	-
CmoCh06G017190	40	9	2.74	0.65	-2.00964	1.59379e-13	5.9835e-13	down	PREDICTED: short-chain type dehydrogenase/reductase-like [Cucumis melo]
CmoCh06G017360	215	67	3.19	1.04	-1.55237	7.07055e-47	6.42481e-46	down	respiratory burst oxidase-like protein [Citrullus colocynthis]
CmoCh07G000070	75	2	1.62	0.05	-5.01959	2.88247e-54	2.926e-53	down	PREDICTED: altered inheritance of mitochondria protein 44 [Juglans regia]
CmoCh07G000300	301	28	18.21	1.78	-3.29271	7.12748e-159	1.89242e-157	down	PLATZ transcription factor family protein [Theobroma cacao]
CmoCh07G000460	215	94	13.58	6.25	-1.06461	7.10021e-27	4.23829e-26	down	PREDICTED: LOW QUALITY PROTEIN: protein G1-like4 [Phoenix dactylifera]
CmoCh07G000600	9	2	15.6	4.15	-1.97896	0.00053508	0.0010461	down	PREDICTED: WPP domain-associated protein [Cucumis melo]
CmoCh07G000820	3117	1081	68.74	24.95	-1.39965	0	0	down	PREDICTED: titin homolog isoform X1 [Theobroma cacao]// EOY27588.1 Remorin family protein isoform 1 [Theobroma cacao]
CmoCh07G001010	20	5	4.34	1.17	-1.84728	9.67711e-07	2.45637e-06	down	PREDICTED: protein TIFY 5A [Cucumis melo]
CmoCh07G001050	6	0	0.16	0.001	-5.55341	1.52593e-05	3.49815e-05	down	PREDICTED: glucan endo-1,3-beta-glucosidase 11-like isoform X1 [Cucumis melo]
CmoCh07G001120	15	3	10.84	2.47	-2.15006	5.5513e-06	1.32279e-05	down	PREDICTED: prefoldin subunit 6 [Jatropha curcas]
CmoCh07G001550	66.31	28	2.11	0.93	-1.10571	1.04396e-09	3.20859e-09	down	Aquaporin NIP1-2 [Cajanus cajan]
CmoCh07G001700	103	34	17.95	6.35	-1.46776	2.17544e-21	1.10151e-20	down	transcription factor bHLH35-like protein [Arabidopsis thaliana]// ANM57873.1 transcription factor bHLH35-like protein [Arabidopsis thaliana]
CmoCh07G001730	510	228	10.21	4.78	-1.03304	1.79459e-58	1.94643e-57	down	PREDICTED: probable LRR receptor-like serine/threonine-protein kinase At5g45780 isoform X1 [Cucumis melo]// XP_016899281.1 PREDICTED: probable LRR receptor-like serine/threonine-protein kinase At5g45780 isoform X1 [Cucumis melo]
CmoCh07G001870	2	0	0.09	0.001	-4.02862	0.0312501	0.0472645	down	PREDICTED: U-box domain-containing protein 7 [Cucumis melo]
CmoCh07G002050	51	4	2.14	0.18	-3.50562	2.08668e-29	1.33184e-28	down	PREDICTED: GDSL esterase/lipase At5g45950 [Cucumis melo]
CmoCh07G002090	1418	1	55.24	0.04	-10.1789	0	0	down	PREDICTED: WUSCHEL-related homeobox 9-like isoform X1 [Cucumis melo]
CmoCh07G002170	45	10	2.5	0.58	-2.02893	3.26285e-15	1.31912e-14	down	PREDICTED: NAC domain-containing protein 8-like [Cucumis sativus]// KGN49262.1 NAC domain-containing protein 21/22 [Cucumis sativus]
CmoCh07G002180	392	172	59.1	27.69	-1.05988	3.42058e-47	3.1257e-46	down	PREDICTED: triose phosphate/phosphate translocator, chloroplastic isoform X1 [Cucumis melo]
CmoCh07G002230	254	98	22.34	9.12	-1.24492	8.63561e-40	6.8885e-39	down	PREDICTED: ethylene-responsive transcription factor 4-like [Cucumis melo]
CmoCh07G002420	12	4	1.12	0.4	-1.43008	0.00208824	0.00382252	down	PREDICTED: heat stress transcription factor B-2a-like [Cucumis melo]
CmoCh07G002480	811	129	45.09	7.55	-2.52319	0	0	down	PREDICTED: stem-specific protein TSJT1-like isoform X3 [Cucumis melo]
CmoCh07G002530	47	8	1.63	0.29	-2.40917	3.51571e-19	1.65064e-18	down	PREDICTED: LOW QUALITY PROTEIN: probable polyol transporter 4 [Cucumis melo]
CmoCh07G002560	28	4	7.7	1.2	-2.64357	3.60594e-13	1.33306e-12	down	hypothetical protein PRUPE_4G040400 [Prunus persica]// ONI10317.1 hypothetical protein PRUPE_4G040400 [Prunus persica]
CmoCh07G002570	17	4	1.65	0.41	-1.928	4.81833e-06	1.15352e-05	down	hypothetical protein Csa_6G517110 [Cucumis sativus]
CmoCh07G002580	460	74	34.95	5.93	-2.50608	1.63407e-182	5.08869e-181	down	PREDICTED: sp110 nuclear body protein-like [Juglans regia]
CmoCh07G002660	43	15	5.16	1.91	-1.38426	6.13249e-09	1.80336e-08	down	PREDICTED: F-box protein At4g05010-like [Cucumis melo]
CmoCh07G002960	727	240	23	7.96	-1.47042	3.02644e-142	7.30373e-141	down	PREDICTED: probable cyclin-dependent serine/threonine-protein kinase DDB_G0278487 isoform X2 [Cucumis sativus]
CmoCh07G003040	72	5	2.81	0.21	-3.68851	3.21822e-43	2.73494e-42	down	PREDICTED: probable transcription factor KAN2 isoform X1 [Cucumis melo]
CmoCh07G003150	2	0	5.32	0.001	-4.02862	0.0312501	0.0472645	down	wall-associated receptor kinase galacturonan-binding protein [Medicago truncatula]// AES92662.2 wall-associated receptor kinase galacturonan-binding protein [Medicago truncatula]
CmoCh07G003250	36	8	4.31	1.02	-2.02572	3.02819e-12	1.06777e-11	down	PREDICTED: death-associated inhibitor of apoptosis 1-like [Ziziphus jujuba]
CmoCh07G003270	3	0	6.38	0.001	-4.58381	0.00390629	0.00682066	down	-
CmoCh07G003460	4	0	0.9	0.001	-4.98373	0.00048829	0.000958718	down	PREDICTED: vitellogenin-like [Arachis duranensis]
CmoCh07G003890	22	9	1.57	0.68	-1.15098	0.000365855	0.000731179	down	DUF241 domain protein [Medicago truncatula]// AET03679.1 DUF241 domain protein [Medicago truncatula]
CmoCh07G004360	13	4	0.44	0.14	-1.54436	0.000621094	0.0012057	down	PREDICTED: zinc finger CCCH domain-containing protein 6-like [Cucumis melo]
CmoCh07G004380	25	5	5.16	1.11	-2.16734	1.19201e-09	3.65141e-09	down	-
CmoCh07G004630	16	6	0.94	0.37	-1.27028	0.00109019	0.00205623	down	PREDICTED: transcription factor bHLH110-like isoform X1 [Cucumis melo]
CmoCh07G004670	83	22	3.59	1	-1.78202	1.32435e-22	6.94558e-22	down	PREDICTED: LOW QUALITY PROTEIN: protein HYPER-SENSITIVITY-RELATED 4-like [Cucumis melo]
CmoCh07G004820	21	4	3.4	0.69	-2.23076	1.39406e-08	4.01131e-08	down	-
CmoCh07G005110	2	0	4.57	0.001	-4.02862	0.0312501	0.0472645	down	-
CmoCh07G005130	18	8	51.75	28.19	-1.03093	0.00279933	0.00504343	down	BnaAnng04700D [Brassica napus]
CmoCh07G005240	3	0	0.1	0.001	-4.58381	0.00390629	0.00682066	down	PREDICTED: L-ascorbate oxidase [Cucumis melo]
CmoCh07G005520	437	197	15.79	7.47	-1.02095	2.58592e-49	2.44319e-48	down	PREDICTED: haloacid dehalogenase-like hydrolase domain-containing protein At4g39970 [Cucumis melo]
CmoCh07G005530	161	63	2.55	1.04	-1.22403	3.12264e-25	1.76969e-24	down	PREDICTED: EPIDERMAL PATTERNING FACTOR-like protein 1 [Cucumis melo]
CmoCh07G005690	1982	792	192.81	81.58	-1.19522	2.63242e-295	1.36886e-293	down	PREDICTED: zinc-finger homeodomain protein 1-like [Cucumis sativus]// KGN48718.1 Zinc finger homeodomain protein 1 [Cucumis sativus]
CmoCh07G005700	16	0	2.37	0.001	-6.94912	2.84294e-14	1.10572e-13	down	PREDICTED: retrovirus-related Pol polyprotein from transposon TNT 1-94 [Vigna angularis]
CmoCh07G006140	588	1	32.2	0.06	-8.90915	0	0	down	PREDICTED: transcription factor bHLH18-like [Cucumis melo]
CmoCh07G006170	1202	493	18.89	8.1	-1.15754	1.26327e-170	3.66482e-169	down	PREDICTED: leucine-rich repeat receptor-like serine/threonine-protein kinase BAM1 [Cucumis melo]
CmoCh07G006230	69	28	5.61	2.4	-1.16971	7.94526e-11	2.60556e-10	down	PREDICTED: EPIDERMAL PATTERNING FACTOR-like protein 2 [Cucumis melo]
CmoCh07G006240	618	160	31.15	8.48	-1.82072	5.85625e-164	1.61076e-162	down	PREDICTED: homeobox-leucine zipper protein HAT22-like [Cucumis melo]
CmoCh07G006410	42	16	5.68	2.3	-1.25802	9.63873e-08	2.62157e-07	down	PREDICTED: basic leucine zipper 43-like [Populus euphratica]
CmoCh07G006500	157	4	10.22	0.27	-5.12532	3.90935e-113	7.51337e-112	down	DUF4228 domain-containing protein, partial [Cephalotus follicularis]
CmoCh07G006690	490	199	16.02	6.82	-1.17149	1.40908e-68	1.74771e-67	down	PREDICTED: LOB domain-containing protein 37-like [Cucumis sativus]// KGN48597.1 LOB domain-containing protein [Cucumis sativus]
CmoCh07G006790	3	0	2.08	0.001	-4.58381	0.00390629	0.00682066	down	transmembrane protein [Arabidopsis thaliana]// ANM67207.1 transmembrane protein [Arabidopsis thaliana]
CmoCh07G006870	74	24	2.22	0.76	-1.49183	4.37578e-16	1.82888e-15	down	PREDICTED: probable indole-3-acetic acid-amido synthetase GH3.1 [Cucumis melo]
CmoCh07G007010	4446	1606	71.74	27.1	-1.34093	0	0	down	PREDICTED: probable beta-1,4-xylosyltransferase IRX14 [Cucumis melo]
CmoCh07G007100	4004.48	897	136.79	32.13	-2.03008	0	0	down	PREDICTED: transcription factor SPATULA [Cucumis melo]// XP_016899207.1 PREDICTED: transcription factor SPATULA [Cucumis melo]
CmoCh07G007280	2	0	2.07	0.001	-4.02862	0.0312501	0.0472645	down	DNA-directed RNA polymerase II subunit RPB1-like protein [Arabidopsis thaliana]// AED98267.1 DNA-directed RNA polymerase II subunit RPB1-like protein [Arabidopsis thaliana]
CmoCh07G007300	106	40	1.32	0.52	-1.27542	3.94378e-18	1.78709e-17	down	Transmembrane protein 131-like [Glycine soja]
CmoCh07G007420	3	0	0.71	0.001	-4.58381	0.00390629	0.00682066	down	PREDICTED: salicylic acid-binding protein 2-like [Pyrus x bretschneideri]// XP_018507393.1 PREDICTED: salicylic acid-binding protein 2-like [Pyrus x bretschneideri]
CmoCh07G007480	215	4	9.08	0.18	-5.57857	2.79411e-160	7.46179e-159	down	PREDICTED: B3 domain-containing transcription factor VRN1-like [Cucumis melo]
CmoCh07G007490	120	52	3.46	1.57	-1.07667	8.47719e-16	3.50062e-15	down	B3 domain-containing protein [Cephalotus follicularis]
CmoCh07G007590	3950	1653	220.68	97.16	-1.12867	0	0	down	PREDICTED: oxygen-evolving enhancer protein 1, chloroplastic [Cucumis melo]
CmoCh07G007640	5	1	0.53	0.11	-2.06827	0.012726	0.0207238	down	PREDICTED: transmembrane protein 220 [Cucumis melo]
CmoCh07G007750	138	56	15.67	6.75	-1.17142	1.79508e-20	8.83596e-20	down	PREDICTED: E3 ubiquitin-protein ligase RNF185 [Cucumis melo]// XP_008440160.1 PREDICTED: E3 ubiquitin-protein ligase RNF185 [Cucumis melo]
CmoCh07G007760	78	34	5.65	2.6	-1.06725	1.34403e-10	4.35987e-10	down	PREDICTED: elongation of fatty acids protein 3-like [Cucumis melo]
CmoCh07G007940	55	23	1.28	0.56	-1.1257	1.66218e-08	4.76391e-08	down	PREDICTED: probable serine/threonine-protein kinase At1g54610 [Cucumis melo]
CmoCh07G008040	27	0	1.56	0.001	-7.69925	6.62265e-24	3.60855e-23	down	PREDICTED: WAT1-related protein At5g64700-like isoform X1 [Cucumis sativus]// KGN48390.1 Mtn21-like protein [Cucumis sativus]
CmoCh07G008190	1374	13	50.39	0.5	-6.58263	0	0	down	PREDICTED: transcription factor HEC3-like [Cucumis melo]
CmoCh07G008220	15.69	4	0.97	0.26	-1.84123	1.91705e-05	4.35926e-05	down	PREDICTED: probable cysteine desulfurase [Vigna radiata var. radiata]
CmoCh07G008260	2	0	15.64	0.001	-4.02862	0.0312501	0.0472645	down	-
CmoCh07G008340	5	0	0.22	0.001	-5.29651	6.10368e-05	0.00013234	down	SWIM zinc finger family protein [Populus trichocarpa]// EEE90364.2 SWIM zinc finger family protein [Populus trichocarpa]
CmoCh07G008550	16	6	0.37	0.15	-1.27028	0.00109019	0.00205623	down	PREDICTED: exocyst complex component EXO70A1 isoform X2 [Cucumis melo]
CmoCh07G008590	5	1	1.07	0.23	-2.06827	0.012726	0.0207238	down	BnaC03g02530D [Brassica napus]
CmoCh07G008640	11.23	4.04	2.63	1.02	-1.30596	0.00660914	0.0111994	down	PREDICTED: IAA-amino acid hydrolase ILR1 [Cucumis melo]
CmoCh07G009010	1407	455	12.62	4.26	-1.5004	6.28542e-306	3.40997e-304	down	PREDICTED: protein ROS1 isoform X4 [Cucumis sativus]
CmoCh07G009190	79.81	28.58	9.13	3.47	-1.33233	6.12376e-15	2.44418e-14	down	PREDICTED: thaumatin-like protein 1b [Cucumis sativus]
CmoCh07G009250	518	209	17.39	7.36	-1.18095	2.76656e-73	3.63079e-72	down	PREDICTED: probable pectate lyase 12 [Cucumis melo]
CmoCh07G009430	20	5	0.3	0.08	-1.84728	9.67711e-07	2.45637e-06	down	Non-intrinsic ABC protein 12 isoform 1 [Theobroma cacao]
CmoCh07G009470	55	23.01	1.4	0.61	-1.1257	1.66218e-08	4.76391e-08	down	phenylalanine ammonia-lyase 3 [Luffa aegyptiaca]
CmoCh07G009540	44.23	2.94	1.1	0.08	-3.69437	3.07923e-27	1.85697e-26	down	phenylalanine ammonia-lyase 3 [Luffa aegyptiaca]
CmoCh07G009550	37.11	6.73	0.93	0.18	-2.25473	3.79719e-14	1.46713e-13	down	phenylalanine ammonia-lyase 3 [Luffa aegyptiaca]
CmoCh07G009560	21.09	7.06	0.53	0.19	-1.44145	2.18109e-05	4.93278e-05	down	PREDICTED: phenylalanine ammonia-lyase-like [Cucumis melo]
CmoCh07G010000	3	0	0.18	0.001	-4.58381	0.00390629	0.00682066	down	Protein ALUMINUM SENSITIVE 3 [Glycine soja]
CmoCh07G010050	39	17	1.03	0.47	-1.06462	5.81673e-06	1.38341e-05	down	PREDICTED: restin homolog isoform X2 [Cucumis sativus]
CmoCh07G010120	1300	571	126.2	58.69	-1.05875	1.18119e-158	3.13318e-157	down	Argininosuccinate lyase [Gossypium arboreum]
CmoCh07G010220	3	0	1.53	0.001	-4.58381	0.00390629	0.00682066	down	UNC93-like protein [Glycine soja]
CmoCh07G010810	1083	464	36.57	16.43	-1.0946	3.68061e-140	8.75972e-139	down	PREDICTED: fructose-1,6-bisphosphatase, chloroplastic-like [Cucumis melo]
CmoCh07G011050	148	65	5.24	2.41	-1.05767	1.00642e-18	4.65074e-18	down	PREDICTED: vacuolar cation/proton exchanger 3 [Cucumis melo]
CmoCh07G011130	5	0	0.74	0.001	-5.29651	6.10368e-05	0.00013234	down	PREDICTED: 26S proteasome non-ATPase regulatory subunit 7 homolog A [Ziziphus jujuba]
CmoCh07G011330	36	8	0.77	0.18	-2.02572	3.02819e-12	1.06777e-11	down	PREDICTED: phosphatidylinositol 4-phosphate 5-kinase 5-like [Cucumis melo]
CmoCh07G011480	1448.29	549.15	50.13	19.93	-1.27096	1.05819e-239	4.40541e-238	down	mitotic B-type cyclin [Cucumis melo subsp. melo]
CmoCh07G011660	2	0	2.17	0.001	-4.02862	0.0312501	0.0472645	down	PREDICTED: protein RALF-like 19 [Cucumis melo]
CmoCh07G011910	1278	545	26.52	11.84	-1.10135	9.61503e-167	2.68753e-165	down	PREDICTED: probable inactive leucine-rich repeat receptor-like protein kinase At3g03770 [Cucumis melo]
CmoCh07G012320	11	0	21.81	0.001	-6.41385	4.65722e-10	1.46204e-09	down	-
CmoCh07G012670	67	16	4.13	1.04	-1.93012	1.90637e-20	9.37704e-20	down	PREDICTED: transcription repressor OFP1 [Cucumis melo]
CmoCh07G012730	5	1	26.42	6.62	-2.06827	0.012726	0.0207238	down	-
CmoCh07G013040	899	411	52.87	25.44	-1.00093	2.34699e-100	4.04775e-99	down	PREDICTED: thioredoxin-like 3-1, chloroplastic [Cucumis melo]
CmoCh07G013260	14	6	11.8	5.82	-1.0793	0.00864201	0.0144497	down	PREDICTED: homeobox-DDT domain protein RLT2-like isoform X3 [Juglans regia]
CmoCh07G013560	25	9	1.58	0.6	-1.33438	2.2375e-05	5.05083e-05	down	PREDICTED: polygalacturonase inhibitor-like [Cucumis melo]
CmoCh07G013570	2	0	0.07	0.001	-4.02862	0.0312501	0.0472645	down	PREDICTED: cytochrome P450 93A2-like [Cucumis sativus]
CmoCh07G013740	70	31	2.1	0.97	-1.04418	1.90377e-09	5.76064e-09	down	PREDICTED: LOW QUALITY PROTEIN: EGF domain-specific O-linked N-acetylglucosamine transferase-like [Cucumis melo]
CmoCh07G014050	2866	962	73.67	25.9	-1.44677	0	0	down	PREDICTED: patellin-3 [Cucumis sativus]// KGN54828.1 Patellin-3 [Cucumis sativus]
CmoCh07G014210	8.59	2.08	0.55	0.14	-1.97896	0.00053508	0.0010461	down	PREDICTED: translation factor GUF1 homolog, chloroplastic [Cucumis melo]
CmoCh07G014230	81	29	4.24	1.6	-1.35022	2.06088e-15	8.38627e-15	down	Os06g0316600 [Oryza sativa Japonica Group]
CmoCh08G000010	576	39	35.2	2.51	-3.7524	0	0	down	PREDICTED: B3 domain-containing transcription factor NGA2-like [Cucumis melo]
CmoCh08G000040	9.01	2	0.78	0.18	-1.97896	0.00053508	0.0010461	down	PREDICTED: transcription factor TCP20-like [Cucumis melo]// XP_016902500.1 PREDICTED: transcription factor TCP20-like [Cucumis melo]
CmoCh08G000090	9	2	25.87	7.05	-1.97896	0.00053508	0.0010461	down	-
CmoCh08G000110	8	0	0.56	0.001	-5.96075	2.38434e-07	6.31669e-07	down	PREDICTED: bidirectional sugar transporter N3 [Cucumis melo]
CmoCh08G000380	825	334	13.09	5.54	-1.17622	6.48605e-121	1.34302e-119	down	PREDICTED: nodulation receptor kinase-like [Cucumis melo]
CmoCh08G000490	32	13	3.76	1.62	-1.1642	1.15198e-05	2.68193e-05	down	RmlC-like cupins superfamily protein [Theobroma cacao]
CmoCh08G000550	692	308	15.46	7.2	-1.03951	9.01218e-83	1.30862e-81	down	PREDICTED: transcription factor PIF1 [Cucumis melo]// XP_008461999.1 PREDICTED: transcription factor PIF1 [Cucumis melo]
CmoCh08G000700	16	2	42.53	6.49	-2.79999	4.00398e-08	1.11792e-07	down	PREDICTED: CLAVATA3/ESR (CLE)-related protein 41-like [Juglans regia]
CmoCh08G000780	390	105	12.27	3.46	-1.76389	1.02619e-99	1.75992e-98	down	BnaA03g14570D [Brassica napus]
CmoCh08G000980	8	1	2.72	0.37	-2.73251	8.79809e-05	0.000187486	down	PREDICTED: cysteine proteinase inhibitor B [Cucumis sativus]// KGN45922.1 Cystatin [Cucumis sativus]
CmoCh08G001350	4276.62	1526	33.88	12.62	-1.35873	0	0	down	PREDICTED: protein TSS [Cucumis melo]
CmoCh08G002210	122	48	6.91	2.86	-1.21569	4.32108e-19	2.0236e-18	down	BnaA05g30430D [Brassica napus]
CmoCh08G002370	74	13	5.26	0.98	-2.37032	6.0874e-29	3.8391e-28	down	DUF506 family protein [Medicago truncatula]// AET01410.1 DUF506 family protein [Medicago truncatula]
CmoCh08G002510	89	32	8.4	3.2	-1.34443	1.46675e-16	6.26043e-16	down	PREDICTED: auxin-induced in root cultures protein 12 [Cucumis melo]
CmoCh08G002790	4.22	0	1.32	0.001	-4.98373	0.00048829	0.000958718	down	-
CmoCh08G002930	25	11	6.53	3.12	-1.04831	0.000445384	0.000883013	down	PREDICTED: ethylene-responsive transcription factor ERF098-like [Cucumis melo]
CmoCh08G002940	2	0	0.14	0.001	-4.02862	0.0312501	0.0472645	down	PREDICTED: palmitoyl-monogalactosyldiacylglycerol delta-7 desaturase, chloroplastic-like [Cucumis melo]
CmoCh08G002950	3	0	0.16	0.001	-4.58381	0.00390629	0.00682066	down	PREDICTED: hyoscyamine 6-dioxygenase-like [Cucumis melo]
CmoCh08G002960	187	36	7.41	1.5	-2.24516	3.06648e-66	3.68727e-65	down	1-aminocyclopropane-1-carboxylate oxidase-1-like protein [Morus notabilis]// EXC31932.1 1-aminocyclopropane-1-carboxylate oxidase-1-like protein [Morus notabilis]
CmoCh08G003030	129	52	7.88	3.35	-1.18089	1.58442e-19	7.53133e-19	down	PREDICTED: auxin-induced protein AUX28-like [Cucumis melo]
CmoCh08G003170	177	62	5.69	2.09	-1.38365	9.47047e-33	6.5415e-32	down	PREDICTED: protein indeterminate-domain 9 [Cucumis sativus]
CmoCh08G003850	230	100	11.14	5.09	-1.07269	6.0809e-29	3.83588e-28	down	PREDICTED: CASP-like protein 1E1 [Cucumis melo]
CmoCh08G003890	3	0	2.57	0.001	-4.58381	0.00390629	0.00682066	down	glutaredoxin-C11-like [Cajanus cajan]// KYP71498.1 Glutaredoxin-C11 [Cajanus cajan]
CmoCh08G003920	7	2	5.49	1.8	-1.62228	0.00935554	0.0155574	down	glutaredoxin family protein [Populus trichocarpa]// EEE99348.1 glutaredoxin family protein [Populus trichocarpa]
CmoCh08G003980	24	3	8.39	1.15	-2.82345	3.16276e-12	1.11323e-11	down	-
CmoCh08G004000	5	1	0.11	0.02	-2.06827	0.012726	0.0207238	down	PREDICTED: potassium transporter 5-like [Cucumis melo]
CmoCh08G004050	392	102	39.61	10.92	-1.81303	6.21135e-104	1.10871e-102	down	PREDICTED: desiccation-related protein PCC13-62-like [Cucumis melo]
CmoCh08G004300	381	156	11.69	5.01	-1.15959	1.04864e-52	1.03922e-51	down	PREDICTED: endoglucanase 17-like [Cucumis melo]
CmoCh08G004320	84	37	2.15	0.99	-1.05241	3.827e-11	1.27737e-10	down	ethylene receptor 1 [Cucurbita pepo]
CmoCh08G004430	64.81	27	11.42	5.1	-1.13596	6.7348e-10	2.0921e-09	down	PREDICTED: zinc finger protein 6-like [Cucumis melo]
CmoCh08G004530	38	13	0.82	0.29	-1.4112	1.78618e-08	5.10866e-08	down	PREDICTED: probable beta-D-xylosidase 2 [Cucumis melo]
CmoCh08G004560	3	0	2.81	0.001	-4.58381	0.00390629	0.00682066	down	-
CmoCh08G004600	566	196	288.76	111.93	-1.40136	1.29137e-103	2.29023e-102	down	PREDICTED: calvin cycle protein CP12-1, chloroplastic-like [Cucumis melo]
CmoCh08G004690	239	7	4.09	0.13	-4.94185	1.63698e-168	4.65105e-167	down	stachyose synthetase variant 1 [Cucumis sativus]// ABV44499.1 stachyose synthetase variant 2 [Cucumis sativus]// ABV44500.1 stachyose synthetase variant 3 [Cucumis sativus]
CmoCh08G005160	113	3	6.29	0.18	-5.05251	3.84338e-81	5.50253e-80	down	PREDICTED: cytokinin riboside 5'-monophosphate phosphoribohydrolase LOG1-like isoform X1 [Cucumis melo]
CmoCh08G005430	46660.1	19959	1846.98	829.12	-1.0971	0	0	down	PREDICTED: vicianin hydrolase-like [Cucumis melo]
CmoCh08G005480	309	138	10.19	4.77	-1.03426	4.29299e-36	3.20116e-35	down	PREDICTED: homeobox-leucine zipper protein HOX11-like [Cucumis melo]
CmoCh08G005590	5	0	0.53	0.001	-5.29651	6.10368e-05	0.00013234	down	PREDICTED: protein UPSTREAM OF FLC isoform X3 [Cucumis melo]// XP_008461229.1 PREDICTED: protein UPSTREAM OF FLC isoform X3 [Cucumis melo]
CmoCh08G005640	271	90	7.72	2.68	-1.46104	1.1559e-53	1.16095e-52	down	PREDICTED: 4-coumarate--CoA ligase 1-like [Cucumis melo]
CmoCh08G005650	7	1	0.23	0.03	-2.54317	0.000488299	0.000958718	down	PREDICTED: 4-coumarate--CoA ligase 1-like [Cucumis melo]
CmoCh08G005680	515	224	28.2	12.9	-1.07263	1.21261e-62	1.39306e-61	down	OSIGBa0132E09-OSIGBa0108L24.3 [Oryza sativa Indica Group]
CmoCh08G005920	8	1	1.18	0.16	-2.73251	8.79809e-05	0.000187486	down	AP2 domain-containing protein [Cephalotus follicularis]
CmoCh08G005940	47	11	1.49	0.37	-1.95553	2.93781e-15	1.18963e-14	down	UPF0481 plant-like protein [Medicago truncatula]// AES86511.1 UPF0481 plant-like protein [Medicago truncatula]
CmoCh08G006080	27	0	15.15	0.001	-7.69925	6.62265e-24	3.60855e-23	down	PREDICTED: EPIDERMAL PATTERNING FACTOR-like protein 4 [Cucumis melo]
CmoCh08G006140	380	125	39.86	13.9	-1.47515	1.5397e-75	2.06492e-74	down	PREDICTED: auxin-induced protein IAA6 isoform X1 [Cucumis melo]
CmoCh08G006510	26	7	2.29	0.65	-1.74786	6.07562e-08	1.67561e-07	down	PREDICTED: transcription repressor OFP14 [Cucumis melo]
CmoCh08G006690	10.1	2.31	0.65	0.16	-2.1289	0.00011685	0.000246169	down	PREDICTED: hydroxyphenylpyruvate reductase-like [Cucumis melo]
CmoCh08G006730	7000	1691	148.09	37.44	-1.92136	0	0	down	PREDICTED: homeobox-leucine zipper protein GLABRA 2 [Cucumis melo]
CmoCh08G007060	141	51	6.39	2.43	-1.33704	2.61641e-25	1.48432e-24	down	PREDICTED: protein IQ-DOMAIN 14-like [Cucumis melo]
CmoCh08G007070	55	3	5.23	0.3	-4.01544	4.74061e-35	3.44363e-34	down	PREDICTED: profilin-3 [Populus euphratica]
CmoCh08G007180	6	0	0.33	0.001	-5.55341	1.52593e-05	3.49815e-05	down	PREDICTED: transcription factor bHLH87 [Cucumis melo]
CmoCh08G007300	2.94	0	0.1	0.001	-4.58381	0.00390629	0.00682066	down	Retrovirus-related Pol polyprotein from transposon TNT 1-94, partial [Cajanus cajan]
CmoCh08G007790	19	7	0.99	0.38	-1.298	0.000216835	0.000442894	down	NGR2 [Glycine max]
CmoCh08G008020	60	4	5.97	0.42	-3.73953	2.67403e-36	2.00153e-35	down	LL-diaminopimelate aminotransferase [Gossypium arboreum]
CmoCh08G008090	95	34	3.19	1.2	-1.35127	9.42467e-18	4.20842e-17	down	PREDICTED: (R)-mandelonitrile lyase-like [Cucumis melo]
CmoCh08G008200	13	0	9.39	0.001	-6.65225	7.2773e-12	2.5171e-11	down	PREDICTED: KH domain-containing protein At4g18375 [Cucumis melo]
CmoCh08G008300	96	27	8.38	2.49	-1.69763	2.14904e-24	1.18907e-23	down	zinc ion-binding protein [Medicago truncatula]// KEH22364.1 zinc ion-binding protein [Medicago truncatula]
CmoCh08G008380	27	2	1.16	0.09	-3.55011	2.79776e-16	1.17972e-15	down	PREDICTED: crocetin glucosyltransferase, chloroplastic-like [Cucumis melo]
CmoCh08G008390	68	27	2.65	1.1	-1.20093	4.89411e-11	1.62685e-10	down	PREDICTED: crocetin glucosyltransferase, chloroplastic-like [Cucumis melo]
CmoCh08G008400	588.84	4.51	24.23	0.19	-6.71841	0	0	down	PREDICTED: crocetin glucosyltransferase, chloroplastic-like [Cucumis melo]
CmoCh08G008450	12	3	0.81	0.21	-1.83124	0.000247108	0.000502086	down	PREDICTED: probable acyl-activating enzyme 16, chloroplastic [Cucumis melo]
CmoCh08G008670	26.2	2	0.93	0.07	-3.49593	1.73027e-15	7.06151e-15	down	BnaC04g29410D [Brassica napus]
CmoCh08G008680	244.8	28	13.44	1.62	-2.99587	2.10651e-118	4.25314e-117	down	PREDICTED: survival motor neuron protein-like isoform X4 [Cucumis melo]
CmoCh08G008690	377	0	26.22	0.001	-11.4963	2.10956381672149e-316	1.1865220163106e-314	down	PREDICTED: pollen-specific leucine-rich repeat extensin-like protein 3 [Cucumis melo]
CmoCh08G008700	25	0	1.02	0.001	-7.58877	2.11904e-22	1.10315e-21	down	PREDICTED: pollen-specific leucine-rich repeat extensin-like protein 3, partial [Cucumis melo]
CmoCh08G008860	30	8	1.65	0.46	-1.76373	7.12063e-09	2.08904e-08	down	PREDICTED: protein O-glucosyltransferase 1-like [Cucumis melo]
CmoCh08G008930	1002	232	16.81	4.07	-1.98209	7.58246e-296	3.95033e-294	down	PREDICTED: homeobox-leucine zipper protein ANTHOCYANINLESS 2 [Cucumis melo]
CmoCh08G009120	103	44	3.39	1.52	-1.09694	4.56749e-14	1.75958e-13	down	PREDICTED: MADS-box protein SOC1-like [Cucumis sativus]
CmoCh08G009190	116	33	2.56	0.76	-1.68196	6.35833e-29	4.00813e-28	down	Mycolic acid cyclopropane synthase [Corchorus olitorius]
CmoCh08G009660	17	2	1.21	0.15	-2.88676	7.4569e-09	2.18235e-08	down	nucleotide-diphospho-sugar transferase family protein, partial [Medicago truncatula]// AES60353.2 nucleotide-diphospho-sugar transferase family protein, partial [Medicago truncatula]
CmoCh08G010460	2	0	14.14	0.001	-4.02862	0.0312501	0.0472645	down	-
CmoCh08G010510	16	7	0.62	0.29	-1.05191	0.00490376	0.00845412	down	phosphatase 2C (PP2C)-like protein [Corchorus capsularis]
CmoCh08G010560	15	6	27.77	13.35	-1.17795	0.0031563	0.00564488	down	-
CmoCh08G010570	253	36	8.96	1.34	-2.68099	3.85278e-109	7.15998e-108	down	RecName: Full=11S globulin subunit beta; Contains: RecName: Full=11S globulin gamma chain; AltName: Full=11S globulin acidic chain; Contains: RecName: Full=11S globulin delta chain; AltName: Full=11S globulin basic chain; Flags: Precursor// P13744.1 RecName: Full=11S globulin subunit beta; Contains: RecName: Full=11S globulin gamma chain; AltName: Full=11S globulin acidic chain; Contains: RecName…
CmoCh08G010900	239	93	23.79	9.81	-1.2326	6.80882e-37	5.16803e-36	down	PREDICTED: auxin-induced protein 22B [Cucumis melo]
CmoCh08G010960	2	0	0.14	0.001	-4.02862	0.0312501	0.0472645	down	-
CmoCh08G010970	3	0	0.41	0.001	-4.58381	0.00390629	0.00682066	down	PREDICTED: 1,2-dihydroxy-3-keto-5-methylthiopentene dioxygenase 4 [Cucumis melo]
CmoCh08G011160	25.61	0	1.18	0.001	-7.64506	5.2978e-23	2.81596e-22	down	PREDICTED: late embryogenesis abundant protein D-34-like [Cucumis melo]
CmoCh08G011170	19179	8481	640.64	297.02	-1.04917	0	0	down	PREDICTED: FRIGIDA-like protein 4a [Cucumis melo]
CmoCh08G011210	344	97	6.75	1.99	-1.69708	1.25154e-83	1.83567e-82	down	PREDICTED: probable serine/threonine-protein kinase WNK9 [Cucumis melo]
CmoCh08G011220	1697	457	45.5	12.83	-1.76441	0	0	down	PREDICTED: primary amine oxidase-like [Cucumis melo]
CmoCh08G011280	150	7	5.66	0.28	-4.27027	8.95865e-98	1.51845e-96	down	PREDICTED: chloride channel protein CLC-d [Cucumis melo]
CmoCh08G011300	202	32	19.41	3.26	-2.52573	1.28694e-81	1.84634e-80	down	SEY1 [Theobroma cacao]
CmoCh08G011390	459	190	22.09	9.61	-1.14396	5.23159e-62	5.96783e-61	down	PREDICTED: basic 7S globulin-like [Cucumis melo]
CmoCh08G011410	1176	524	30.07	14.03	-1.03804	5.36156e-139	1.25757e-137	down	PREDICTED: RNA-binding protein cabeza-like [Cucumis melo]// XP_016902304.1 PREDICTED: RNA-binding protein cabeza-like [Cucumis melo]
CmoCh08G011640	439	162	51.21	20.07	-1.30955	7.02072e-73	9.15717e-72	down	PREDICTED: histidine-containing phosphotransfer protein 1 isoform X1 [Cucumis melo]
CmoCh08G011840	8	2	6.84	1.97	-1.81162	0.00231579	0.00421803	down	monothiol glutaredoxin-S2-like [Cucumis sativus]// XP_008458479.1 PREDICTED: monothiol glutaredoxin-S2-like [Cucumis melo]// AGX01495.1 glutaredoxin [Cucumis sativus]// KGN47200.1 Glutaredoxin family protein [Cucumis sativus]
CmoCh08G012040	128	37	2.39	0.72	-1.65933	5.47686e-31	3.62232e-30	down	glyoxysomal fatty acid beta-oxidation multifunctional protein MFP-a [Cucumis sativus]// Q39659.1 RecName: Full=Glyoxysomal fatty acid beta-oxidation multifunctional protein MFP-a; Includes: RecName: Full=Enoyl-CoA hydratase/3-2-trans-enoyl-CoA isomerase/3-hydroxybutyryl-CoA epimerase; Includes: RecName: Full=3-hydroxyacyl-CoA dehydrogenase// CAA55630.1 tetrafunctional protein [Cucumis sativus]
CmoCh08G012050	335	151	8.62	4.07	-1.02099	3.04627e-38	2.36028e-37	down	PREDICTED: phylloplanin-like [Cucumis melo]
CmoCh08G012060	516	82	20.58	3.43	-2.5239	3.11124e-206	1.10783e-204	down	PREDICTED: serine-rich adhesin for platelets [Theobroma cacao]
CmoCh08G012090	129	53	12.15	5.28	-1.15348	9.38337e-19	4.33975e-18	down	senescence-associated family protein [Populus trichocarpa]// ERP57958.1 senescence-associated family protein [Populus trichocarpa]
CmoCh08G012270	5	1	2.15	0.48	-2.06827	0.012726	0.0207238	down	PREDICTED: zinc finger protein 6-like [Cucumis sativus]
CmoCh08G012490	2	0	0.21	0.001	-4.02862	0.0312501	0.0472645	down	PREDICTED: uncharacterized protein LOC101207042 [Cucumis sativus]// KGN47457.1 hypothetical protein Csa_6G327960 [Cucumis sativus]
CmoCh08G012600	220	0	9.11	0.001	-10.7196	4.10128e-184	1.28737e-182	down	PREDICTED: galactinol synthase 2 [Cucumis melo]
CmoCh09G000120	2	0	0.65	0.001	-4.02862	0.0312501	0.0472645	down	-
CmoCh09G000510	19	3	0.82	0.14	-2.48847	1.17567e-08	3.40101e-08	down	12-oxophytodienoate reductase 2 isoform 1 [Theobroma cacao]
CmoCh09G000810	3541	1401	685.83	291.57	-1.20959	0	0	down	PREDICTED: plastocyanin [Nicotiana attenuata]// OIT26136.1 plastocyanin, chloroplastic [Nicotiana attenuata]
CmoCh09G000820	198	82	11.3	4.93	-1.14261	1.00978e-27	6.15834e-27	down	PREDICTED: 24-methylenesterol C-methyltransferase 2 [Cucumis melo]
CmoCh09G000830	3	0	0.33	0.001	-4.58381	0.00390629	0.00682066	down	syringolide-induced protein 14-1-1 [Medicago truncatula]// AES74086.1 syringolide-induced protein 14-1-1 [Medicago truncatula]
CmoCh09G000900	473	136	8.64	2.6	-1.66932	1.17079e-111	2.22378e-110	down	PREDICTED: CO(2)-response secreted protease isoform X2 [Theobroma cacao]
CmoCh09G000930	141	47	2.43	0.85	-1.45459	1.4677e-28	9.15156e-28	down	PREDICTED: receptor protein kinase CLAVATA1 [Cucumis melo]
CmoCh09G000950	146	42	5.66	1.71	-1.66666	2.28135e-35	1.66952e-34	down	PREDICTED: thaumatin-like protein 1 [Cucumis melo]
CmoCh09G001100	251	102	196.85	91.72	-1.17014	6.96256e-36	5.15828e-35	down	PREDICTED: auxin-induced protein 15A-like [Ziziphus jujuba]// XP_015870353.1 PREDICTED: auxin-induced protein 15A-like [Ziziphus jujuba]
CmoCh09G001280	21	6	0.37	0.11	-1.65981	2.7325e-06	6.69342e-06	down	PREDICTED: beta-galactosidase 5-like [Cucumis melo]
CmoCh09G001360	4	0	0.65	0.001	-4.98373	0.00048829	0.000958718	down	PREDICTED: probable mitochondrial chaperone BCS1-A [Cucumis sativus]
CmoCh09G001440	124	9	5.11	0.39	-3.63873	3.59162e-72	4.645e-71	down	PREDICTED: mannan endo-1,4-beta-mannosidase 7-like [Cucumis melo]// ADN34185.1 endo-beta-mannanase [Cucumis melo subsp. melo]
CmoCh09G001560	6	0	1.09	0.001	-5.55341	1.52593e-05	3.49815e-05	down	PREDICTED: protein RADIALIS-like 3 [Cucumis melo]
CmoCh09G001600	120	44	6.87	2.65	-1.31707	2.50596e-21	1.26631e-20	down	PREDICTED: protein LIKE COV 1-like isoform X2 [Cucumis sativus]
CmoCh09G001650	1506	494	56.24	19.35	-1.47987	4.93275140807901e-320	2.79725640771584e-318	down	PREDICTED: protein indeterminate-domain 2-like [Gossypium hirsutum]
CmoCh09G001780	212	92	5.81	2.64	-1.07533	7.94898e-27	4.73264e-26	down	PREDICTED: cytochrome P450 CYP82D47-like [Cucumis melo]
CmoCh09G001820	40	12	1.69	0.53	-1.59933	2.24306e-10	7.17822e-10	down	PREDICTED: cytochrome P450 CYP82D47-like [Cucumis melo]
CmoCh09G001860	18	0	0.64	0.001	-7.11775	4.44243e-16	1.8559e-15	down	PREDICTED: cytochrome P450 CYP82D47-like [Cucumis melo]
CmoCh09G001870	33.12	9	1.28	0.37	-1.7331	2.2059e-09	6.65294e-09	down	PREDICTED: cytochrome P450 82A3-like [Cucumis melo]
CmoCh09G001880	87.88	39	1.66	0.77	-1.04371	2.07758e-11	7.02898e-11	down	PREDICTED: cytochrome P450 CYP82D47-like [Cucumis melo]
CmoCh09G001890	150	55	1.56	0.6	-1.31754	3.43991e-26	2.00983e-25	down	Cytochrome P450 82A3 [Cajanus cajan]
CmoCh09G001900	3	0	0.26	0.001	-4.58381	0.00390629	0.00682066	down	PREDICTED: probable transcription factor KAN4 [Cucumis melo]
CmoCh09G002040	42	17	2.92	1.24	-1.17119	4.44298e-07	1.15474e-06	down	-
CmoCh09G002060	13	3	10.64	2.82	-1.94552	6.17027e-05	0.000133721	down	transmembrane protein [Arabidopsis thaliana]// ABJ98581.1 At5g66815 [Arabidopsis thaliana]// AED98266.1 transmembrane protein [Arabidopsis thaliana]
CmoCh09G002100	4	0	0.41	0.001	-4.98373	0.00048829	0.000958718	down	Epimerase domain-containing protein [Cephalotus follicularis]
CmoCh09G002290	4	0	0.44	0.001	-4.98373	0.00048829	0.000958718	down	PREDICTED: transcription factor HEC2-like [Cucumis melo]
CmoCh09G002310	8	1	7.87	1.14	-2.73251	8.79809e-05	0.000187486	down	PREDICTED: protein ROOT INITIATION DEFECTIVE 3 [Cucumis melo]
CmoCh09G002720	16	6	1.5	0.6	-1.27028	0.00109019	0.00205623	down	4F5 domain-containing protein/zf-met2 domain-containing protein [Cephalotus follicularis]
CmoCh09G002840	4	0	0.11	0.001	-4.98373	0.00048829	0.000958718	down	PREDICTED: increased DNA methylation 1-like [Cucumis melo]
CmoCh09G002850	11	4	1.69	0.66	-1.30596	0.00660914	0.0111994	down	F14N23.10 [Arabidopsis thaliana]
CmoCh09G002880	83	9	4.69	0.53	-3.06032	4.19873e-42	3.49704e-41	down	PREDICTED: translation initiation factor IF-2-like [Gossypium arboreum]
CmoCh09G003090	65	4	10.62	0.7	-3.85477	2.46658e-40	1.98885e-39	down	hypothetical protein Csa_4G644710 [Cucumis sativus]
CmoCh09G003100	5603	1791	106.51	35.62	-1.51733	0	0	down	PREDICTED: AP2-like ethylene-responsive transcription factor AIL1 isoform X1 [Cucumis melo]
CmoCh09G003120	138	43	4.12	1.35	-1.55158	2.15915e-30	1.41244e-29	down	PREDICTED: sodium-coupled neutral amino acid transporter 2-like [Cucumis melo]
CmoCh09G003180	2	0	0.11	0.001	-4.02862	0.0312501	0.0472645	down	PREDICTED: transcription factor MYB36-like [Cucumis melo]
CmoCh09G003190	1484	98	69.62	4.83	-3.79089	0	0	down	PREDICTED: homeobox-leucine zipper protein HAT22-like [Populus euphratica]
CmoCh09G003240	269	75	16	4.7	-1.71301	1.89555e-66	2.28527e-65	down	PREDICTED: zinc finger CCCH domain-containing protein 20-like [Cucumis melo]
CmoCh09G003330	16	6	1.2	0.48	-1.27028	0.00109019	0.00205623	down	-
CmoCh09G003440	269	99	14.87	5.76	-1.31302	1.42109e-45	1.2634e-44	down	PREDICTED: cytokinin riboside 5'-monophosphate phosphoribohydrolase LOG8 [Cucumis melo]// XP_008452739.1 PREDICTED: cytokinin riboside 5'-monophosphate phosphoribohydrolase LOG8 [Cucumis melo]
CmoCh09G003660	22475	8714	381.85	154.83	-1.23886	0	0	down	PREDICTED: LRR receptor-like serine/threonine-protein kinase ERECTA [Cucumis melo]
CmoCh09G003710	9	1	9.3	1.2	-2.89986	1.52375e-05	3.49815e-05	down	-
CmoCh09G003940	38	11	2.02	0.62	-1.64982	3.1901e-10	1.01196e-09	down	PREDICTED: peroxidase 18 [Cucumis melo]
CmoCh09G004090	3	0	19.21	0.001	-4.58381	0.00390629	0.00682066	down	-
CmoCh09G004270	10	3	1.44	0.46	-1.5713	0.00337801	0.00601043	down	PREDICTED: zinc finger protein 1-like [Cucumis melo]
CmoCh09G004300	489	142	29.77	9.1	-1.65507	5.44455e-114	1.05299e-112	down	DUF868 domain-containing protein [Cephalotus follicularis]
CmoCh09G004400	8	2	11.49	3.41	-1.81162	0.00231579	0.00421803	down	-
CmoCh09G004490	78	27	1.89	0.69	-1.39852	1.70331e-15	6.95453e-15	down	PREDICTED: synaptotagmin-4-like [Cucumis melo]
CmoCh09G004650	2	0	3.25	0.001	-4.02862	0.0312501	0.0472645	down	-
CmoCh09G004940	13	5	0.59	0.24	-1.23082	0.00383851	0.00677226	down	PREDICTED: potassium channel KAT3 [Cucumis melo]
CmoCh09G005270	166	59	3.52	1.31	-1.36257	2.40115e-30	1.56814e-29	down	PREDICTED: U-box domain-containing protein 52 [Cucumis melo]
CmoCh09G005530	116	7	3.71	0.23	-3.8998	8.21509e-72	1.05848e-70	down	PREDICTED: 7-deoxyloganetin glucosyltransferase [Cucumis melo]
CmoCh09G005580	347	72	9.94	2.16	-2.13898	1.79327e-114	3.47801e-113	down	O-FucT domain-containing protein [Cephalotus follicularis]
CmoCh09G005940	35	6	2.39	0.43	-2.39321	3.29471e-14	1.27585e-13	down	PREDICTED: transcription factor bHLH61-like [Cucumis melo]
CmoCh09G006270	79	18	1.39	0.33	-1.99865	3.39438e-25	1.92172e-24	down	PREDICTED: synaptonemal complex protein 1-like [Cucumis melo]
CmoCh09G006290	337	134	16.08	6.72	-1.20175	1.68909e-49	1.6019e-48	down	PREDICTED: uncharacterized methyltransferase At1g78140, chloroplastic [Cucumis melo]
CmoCh09G006480	288	24	5.11	0.45	-3.45041	8.89452e-158	2.35478e-156	down	PREDICTED: nitrate reductase [NADH]-like [Cucumis melo]
CmoCh09G006600	74	26	17.59	6.68	-1.3769	1.71364e-14	6.73528e-14	down	BnaC01g36610D [Brassica napus]
CmoCh09G006640	103	35	8.3	2.98	-1.42609	1.38173e-20	6.83547e-20	down	PREDICTED: peptide methionine sulfoxide reductase B1, chloroplastic [Cucumis melo]
CmoCh09G006690	2	0	0.63	0.001	-4.02862	0.0312501	0.0472645	down	PREDICTED: glucan endo-1,3-beta-glucosidase-like [Gossypium hirsutum]// XP_017640924.1 PREDICTED: glucan endo-1,3-beta-glucosidase-like [Gossypium arboreum]// KHG09289.1 Glucan endo-1,3-beta-glucosidase [Gossypium arboreum]
CmoCh09G007000	5	0	0.77	0.001	-5.29651	6.10368e-05	0.00013234	down	PREDICTED: VQ motif-containing protein 22-like [Cucumis melo]
CmoCh09G007050	3	0	0.1	0.001	-4.58381	0.00390629	0.00682066	down	PREDICTED: UDP-glycosyltransferase 82A1 [Cucumis melo]
CmoCh09G007100	2	0	0.53	0.001	-4.02862	0.0312501	0.0472645	down	PREDICTED: pentatricopeptide repeat-containing protein At4g02750-like [Jatropha curcas]
CmoCh09G007250	306	120	17.93	7.4	-1.22164	3.25588e-46	2.92955e-45	down	PREDICTED: cytochrome b561 domain-containing protein At4g18260-like [Cucumis melo]
CmoCh09G007360	241	98	8.21	3.5	-1.16916	1.61582e-34	1.1615e-33	down	PREDICTED: pentatricopeptide repeat-containing protein At1g79080, chloroplastic [Cucumis melo]// ADN33755.1 pentatricopeptide repeat-containing protein [Cucumis melo subsp. melo]
CmoCh09G007380	340	116	16.57	5.94	-1.42244	2.24027e-64	2.62285e-63	down	PREDICTED: uncharacterized serine-rich protein C215.13-like [Juglans regia]
CmoCh09G008220	269	96	8.74	3.27	-1.35736	9.10187e-48	8.39236e-47	down	PREDICTED: transcription factor TCP4 [Cucumis melo]
CmoCh09G008400	47	16	6.95	2.53	-1.41982	4.0711e-10	1.28448e-09	down	PREDICTED: ethylene-responsive transcription factor 4 [Cucumis melo]
CmoCh09G008450	442	150	15.65	5.57	-1.43032	9.94429e-84	1.46246e-82	down	Serine/threonine-protein kinase WNK-related isoform 1 [Theobroma cacao]
CmoCh09G008630	9	1	1.13	0.13	-2.89986	1.52375e-05	3.49815e-05	down	hypothetical protein Csa_4G637770 [Cucumis sativus]
CmoCh09G008690	3572	1288	75.3	28.41	-1.34348	0	0	down	PREDICTED: protochlorophyllide reductase, chloroplastic [Cucumis melo]
CmoCh09G008880	209.72	95.86	2.51	1.2	-1.00034	7.44534e-24	4.04881e-23	down	Retrovirus-related Pol polyprotein from transposon TNT 1-94 [Cajanus cajan]
CmoCh09G008980	2.14	0	0.2	0.001	-4.02862	0.0312501	0.0472645	down	PREDICTED: zinc finger protein CONSTANS-LIKE 4 [Cucumis melo]
CmoCh09G009200	132	46	11.33	4.18	-1.39048	6.02871e-25	3.38946e-24	down	PREDICTED: thioredoxin-like protein CXXS1 [Cucumis melo]
CmoCh09G009550	9	0	0.65	0.001	-6.1281	2.98049e-08	8.38956e-08	down	PREDICTED: heterodimeric geranylgeranyl pyrophosphate synthase small subunit, chloroplastic-like [Cucumis melo]
CmoCh09G009710	294	53	10.78	2.04	-2.3411	2.93076e-108	5.39918e-107	down	PREDICTED: indole-3-acetate O-methyltransferase 1 [Cucumis melo]
CmoCh09G009900	22	7	1.42	0.47	-1.50816	6.54574e-06	1.55116e-05	down	PREDICTED: serine acetyltransferase 1, chloroplastic [Cucumis melo]
CmoCh09G010300	15.61	1.74	10.44	1.32	-2.79999	4.00398e-08	1.11792e-07	down	serine-rich family protein [Populus trichocarpa]// EEE83690.1 serine-rich family protein [Populus trichocarpa]
CmoCh09G010400	246	40	16.17	2.77	-2.48901	1.36474e-97	2.30466e-96	down	DUF2431 domain-containing protein, partial [Cephalotus follicularis]
CmoCh09G010410	9.15	1	0.94	0.11	-2.89986	1.52375e-05	3.49815e-05	down	BTB/POZ-like protein [Cynara cardunculus var. scolymus]
CmoCh09G010600	1916	376	61	12.55	-2.22089	0	0	down	PREDICTED: apyrase 2-like [Sesamum indicum]
CmoCh09G010690	263	114	19.23	8.8	-1.07719	6.20693e-33	4.30673e-32	down	Polyadenylate-binding protein 1-B-binding protein [Theobroma cacao]
CmoCh09G010710	4	0	0.3	0.001	-4.98373	0.00048829	0.000958718	down	Polyadenylate-binding protein 1-B-binding protein [Theobroma cacao]
CmoCh09G010810	2	0	0.16	0.001	-4.02862	0.0312501	0.0472645	down	PREDICTED: myb-related protein 308-like [Citrus sinensis]
CmoCh09G010940	19303	1229	730.16	48.77	-3.8451	0	0	down	PREDICTED: extensin-2 [Solanum pennellii]
CmoCh09G010960	175	49	6.58	1.93	-1.70602	1.13173e-43	9.71966e-43	down	alcohol dehydrogenase [Citrullus lanatus]
CmoCh09G010990	2336.34	1053.44	76.67	36.24	-1.02141	2.06626e-266	9.5547e-265	down	PREDICTED: serine carboxypeptidase-like 42 isoform X1 [Cucumis melo]
CmoCh09G011060	1.7	0	0.03	0.001	-4.02862	0.0312501	0.0472645	down	Reverse transcriptase, RNA-dependent DNA polymerase [Corchorus capsularis]
CmoCh09G011120	14	2	0.55	0.08	-2.60901	6.24134e-07	1.60473e-06	down	PREDICTED: extensin-2 [Solanum pennellii]
CmoCh09G011240	179	74	12.66	5.52	-1.14505	3.37724e-25	1.91241e-24	down	Acetyltransf_1 domain-containing protein [Cephalotus follicularis]
CmoCh09G011270	3	0	56.11	0.001	-4.58381	0.00390629	0.00682066	down	-
CmoCh09G011610	176.56	68	72.18	30.76	-1.25063	1.96854e-28	1.22302e-27	down	peroxiredoxin family protein [Populus trichocarpa]// EEE92918.2 peroxiredoxin family protein [Populus trichocarpa]
CmoCh09G011620	42.28	13	1.57	0.51	-1.55512	4.56362e-10	1.43626e-09	down	PREDICTED: protein DETOXIFICATION 54 [Cucumis melo]// XP_008461458.1 PREDICTED: protein DETOXIFICATION 54 [Cucumis melo]// XP_008461459.1 PREDICTED: protein DETOXIFICATION 54 [Cucumis melo]// XP_008461460.1 PREDICTED: protein DETOXIFICATION 54 [Cucumis melo]// XP_016902702.1 PREDICTED: protein DETOXIFICATION 54 [Cucumis melo]
CmoCh09G011800	5	1	1.01	0.22	-2.06827	0.012726	0.0207238	down	CTV.15 [Citrus trifoliata]
CmoCh09G012070	2	0	0.06	0.001	-4.02862	0.0312501	0.0472645	down	PREDICTED: protein NRT1/ PTR FAMILY 4.4 [Cucumis melo]
CmoCh09G012120	21	3	41.63	7.17	-2.63192	4.64617e-10	1.46107e-09	down	Mediator of RNA polymerase II transcription subunit 8 [Theobroma cacao]
CmoCh09G012510	3	0	0.44	0.001	-4.58381	0.00390629	0.00682066	down	Retrovirus-related Pol polyprotein from transposon TNT 1-94, partial [Cajanus cajan]
CmoCh09G012520	44.1	15.1	2.68	0.97	-1.41733	1.99143e-09	6.02194e-09	down	Retrovirus-related Pol polyprotein from transposon TNT 1-94 [Cajanus cajan]
CmoCh09G012610	2	0	0.03	0.001	-4.02862	0.0312501	0.0472645	down	PREDICTED: TMV resistance protein N-like [Cucumis melo]
CmoCh09G012810	61	26	1.84	0.82	-1.09873	7.58104e-09	2.21704e-08	down	PREDICTED: MATE efflux family protein 5-like isoform X1 [Cucumis sativus]
CmoCh09G013360	487	188	22.25	9.02	-1.24462	8.40006e-75	1.11838e-73	down	PREDICTED: carboxymethylenebutenolidase homolog [Citrus sinensis]
CmoCh10G000070	530	28	21.89	1.21	-4.10867	0	0	down	PREDICTED: floricaula/leafy homolog [Cucumis melo]// ADN33854.1 transcription activator LFY-like protein [Cucumis melo subsp. melo]
CmoCh10G000320	11	4	0.63	0.24	-1.30596	0.00660914	0.0111994	down	PREDICTED: ABC transporter F family member 4-like [Juglans regia]
CmoCh10G000480	15.39	6.08	4.91	2.12	-1.17795	0.0031563	0.00564488	down	BnaA01g20430D [Brassica napus]
CmoCh10G000550	236	55	44.61	11.16	-1.97091	9.00035e-71	1.14626e-69	down	PREDICTED: protein indeterminate-domain 16 [Cucumis melo]
CmoCh10G000560	105	28	4.22	1.18	-1.7745	3.00879e-28	1.86091e-27	down	PREDICTED: F-box protein At1g67340-like [Cucumis melo]
CmoCh10G000650	4	0	1.14	0.001	-4.98373	0.00048829	0.000958718	down	probable calcium-binding protein CML31 [Cajanus cajan]
CmoCh10G000740	2	0	0.54	0.001	-4.02862	0.0312501	0.0472645	down	PREDICTED: callose synthase 10 [Cucumis melo]// XP_008464455.1 PREDICTED: callose synthase 10 [Cucumis melo]
CmoCh10G000900	2	0	0.31	0.001	-4.02862	0.0312501	0.0472645	down	PREDICTED: rhodanese-like domain-containing protein 11, chloroplastic isoform X2 [Elaeis guineensis]
CmoCh10G000980	124	46	4.23	1.64	-1.30037	1.38471e-21	7.05277e-21	down	Octicosapeptide/Phox/Bem1p family protein [Theobroma cacao]
CmoCh10G001000	229.63	67.72	2.86	0.88	-1.62827	3.097e-53	3.09027e-52	down	PREDICTED: ferric reduction oxidase 8, mitochondrial [Cucumis melo]// XP_008459877.1 PREDICTED: ferric reduction oxidase 8, mitochondrial [Cucumis melo]
CmoCh10G001040	9	3	0.27	0.09	-1.42136	0.0113314	0.0186121	down	PREDICTED: transcription factor MYB32-like [Cucumis sativus]
CmoCh10G001120	57	3	2.36	0.13	-4.06685	2.04948e-36	1.53739e-35	down	PREDICTED: tryptophan aminotransferase-related protein 2-like isoform X1 [Cucumis melo]
CmoCh10G001270	67	18	6.6	1.88	-1.76139	2.57077e-18	1.17185e-17	down	PREDICTED: transcription factor MYB98 [Cucumis sativus]
CmoCh10G001400	19.09	6.02	0.72	0.24	-1.51636	3.37739e-05	7.51621e-05	down	PREDICTED: spermidine synthase 2-like isoform X1 [Cucumis sativus]
CmoCh10G001490	2	0	4.8	0.001	-4.02862	0.0312501	0.0472645	down	-
CmoCh10G001680	776	316	38.37	16.42	-1.16779	1.71206e-112	3.26989e-111	down	CCR4-NOT transcription complex subunit 4 [Morus notabilis]// EXB29763.1 CCR4-NOT transcription complex subunit 4 [Morus notabilis]
CmoCh10G001960	1897.91	722	52.1	20.76	-1.26623	1.69947538989664e-311	9.33018759871544e-310	down	PREDICTED: LRR receptor-like serine/threonine-protein kinase FEI 2 isoform X1 [Cucumis melo]
CmoCh10G002000	45	18	2.34	0.98	-1.18852	9.7475e-08	2.65037e-07	down	PREDICTED: aldose 1-epimerase-like [Cucumis melo]
CmoCh10G002060	8	0	9.17	0.001	-5.96075	2.38434e-07	6.31669e-07	down	PREDICTED: CLAVATA3/ESR (CLE)-related protein 45 [Vigna radiata var. radiata]
CmoCh10G002190	26	11	1.06	0.47	-1.10461	0.000172421	0.000356189	down	PREDICTED: LOW QUALITY PROTEIN: NAC domain-containing protein 100-like [Cucumis melo]
CmoCh10G002260	108	48	7.1	3.33	-1.04004	8.98381e-14	3.41744e-13	down	BnaC07g31180D [Brassica napus]
CmoCh10G002300	2	0	0.1	0.001	-4.02862	0.0312501	0.0472645	down	PREDICTED: transcription factor UNE10 [Cucumis melo]
CmoCh10G002790	18	7	3.82	1.6	-1.22054	0.000642884	0.00124616	down	PREDICTED: probable calcium-binding protein CML15 [Cucumis melo]
CmoCh10G003010	43.08	18.78	2.76	1.27	-1.04563	2.73833e-06	6.7065e-06	down	PREDICTED: uncharacterized ATP-dependent helicase YprA isoform X1 [Cucumis melo]
CmoCh10G003040	3690	1428	81.53	33.02	-1.24151	0	0	down	PREDICTED: squamosa promoter-binding-like protein 6 [Cucumis melo]// XP_008453305.1 PREDICTED: squamosa promoter-binding-like protein 6 [Cucumis melo]// XP_008453306.1 PREDICTED: squamosa promoter-binding-like protein 6 [Cucumis melo]
CmoCh10G003060	14	5	0.55	0.2	-1.33671	0.00184169	0.00339263	down	PREDICTED: COBRA-like protein 4 [Cucumis melo]
CmoCh10G003140	11	0	0.76	0.001	-6.41385	4.65722e-10	1.46204e-09	down	PREDICTED: transcription factor TCP5 [Cucumis melo]// XP_008453285.1 PREDICTED: transcription factor TCP5 [Cucumis melo]
CmoCh10G003170	8	2	0.46	0.12	-1.81162	0.00231579	0.00421803	down	PREDICTED: uncharacterized serine-rich protein C215.13-like [Juglans regia]
CmoCh10G003750	56	24	1.64	0.74	-1.09055	2.56221e-08	7.25291e-08	down	PREDICTED: LOW QUALITY PROTEIN: arginine decarboxylase-like [Cucumis melo]
CmoCh10G003830	23	0	0.77	0.001	-7.46913	1.35604e-20	6.71441e-20	down	PREDICTED: sodium transporter HKT1-like [Cucumis melo]
CmoCh10G004290	202	87	7.19	3.25	-1.08618	4.8596e-26	2.82912e-25	down	PREDICTED: AAA-ATPase At5g57480-like [Cucumis melo]
CmoCh10G004430	22	1	1.26	0.06	-4.17713	5.87672e-15	2.34728e-14	down	PREDICTED: transcription factor MYB36-like [Cucumis melo]
CmoCh10G004460	141	30	24.57	5.6	-2.10022	2.25323e-46	2.03071e-45	down	PREDICTED: pathogenesis-related protein PR-1 [Cucumis melo]
CmoCh10G004640	2205	542	46.75	12.03	-1.89614	0	0	down	PREDICTED: protein ECERIFERUM 3 [Cucumis melo]
CmoCh10G004820	222	77	5.77	2.09	-1.3982	1.83112e-41	1.50644e-40	down	Pre-rRNA-processing protein IPI3 [Anthurium amnicola]// JAT58044.1 Pre-rRNA-processing protein IPI3 [Anthurium amnicola]
CmoCh10G004900	168	57	3.36	1.19	-1.42949	7.45618e-33	5.16572e-32	down	PREDICTED: heat shock 70 kDa protein [Cucumis melo]
CmoCh10G004940	19	6	3.7	1.25	-1.51636	3.37739e-05	7.51621e-05	down	-
CmoCh10G005080	7	2	11.37	3.88	-1.62228	0.00935554	0.0155574	down	hypothetical protein Csa_1G269890 [Cucumis sativus]
CmoCh10G005150	5	1	0.32	0.07	-2.06827	0.012726	0.0207238	down	PREDICTED: temperature-induced lipocalin-1 [Cucumis melo]
CmoCh10G005340	4.32	0	0.78	0.001	-4.98373	0.00048829	0.000958718	down	glycerol-3-phosphate transporter family protein [Populus trichocarpa]// EEF03141.1 glycerol-3-phosphate transporter family protein [Populus trichocarpa]
CmoCh10G005550	118	0	68.44	0.001	-9.82164	1.69101e-99	2.89647e-98	down	PREDICTED: probable glycosyltransferase At5g20260 [Cucumis melo]
CmoCh10G005560	2705	10	169.97	0.66	-7.93438	0	0	down	PREDICTED: probable glycosyltransferase At5g20260 [Cucumis melo]
CmoCh10G005750	9	0	0.62	0.001	-6.1281	2.98049e-08	8.38956e-08	down	PREDICTED: umecyanin-like [Cucumis melo]
CmoCh10G005840	13	1	0.4	0.03	-3.42401	1.04808e-08	3.03991e-08	down	PREDICTED: EIN3-binding F-box protein 1-like [Cucumis melo]
CmoCh10G005900	152	21	7.94	1.15	-2.72062	2.25088e-67	2.74245e-66	down	PREDICTED: peroxidase 25-like [Cucumis melo]// ADN33762.1 peroxidase 25 precursor [Cucumis melo subsp. melo]
CmoCh10G005920	386	119	10.12	3.27	-1.56864	1.06194e-83	1.56091e-82	down	PREDICTED: protein NRT1/ PTR FAMILY 6.2-like [Cucumis melo]
CmoCh10G006000	7	1	3.8	0.61	-2.54317	0.000488299	0.000958718	down	hypothetical protein Csa_1G320330 [Cucumis sativus]
CmoCh10G006070	2	0	0.23	0.001	-4.02862	0.0312501	0.0472645	down	PREDICTED: zinc finger Ran-binding domain-containing protein 2-like isoform X3 [Cucumis sativus]
CmoCh10G006200	52	14	0.95	0.27	-1.7564	2.14406e-14	8.3935e-14	down	PREDICTED: potassium channel AKT1 [Cucumis melo]
CmoCh10G006290	2	0	0.02	0.001	-4.02862	0.0312501	0.0472645	down	PREDICTED: ABC transporter G family member 38 [Cucumis sativus]
CmoCh10G006330	76	22	5.74	1.75	-1.65512	6.68512e-19	3.10904e-18	down	PREDICTED: auxin-responsive protein IAA16-like [Cucumis melo]
CmoCh10G006410	3	0	1.14	0.001	-4.58381	0.00390629	0.00682066	down	PREDICTED: protein SODIUM POTASSIUM ROOT DEFECTIVE 2 isoform X1 [Juglans regia]// XP_018822810.1 PREDICTED: protein SODIUM POTASSIUM ROOT DEFECTIVE 2 isoform X1 [Juglans regia]
CmoCh10G006460	14	6	29.77	15.43	-1.0793	0.00864201	0.0144497	down	BnaCnng04900D [Brassica napus]
CmoCh10G006520	135	61	7.33	3.48	-1.01661	2.49703e-16	1.05501e-15	down	PREDICTED: heat stress transcription factor C-1-like [Cucumis melo]
CmoCh10G006620	30	9	0.94	0.3	-1.59617	6.47438e-08	1.78273e-07	down	PREDICTED: protein NRT1/ PTR FAMILY 1.2-like [Cucumis melo]
CmoCh10G006650	183	82	3.33	1.56	-1.02904	7.65627e-22	3.9301e-21	down	DUF4378 domain-containing protein [Cephalotus follicularis]
CmoCh10G006700	7	0	0.32	0.001	-5.77141	1.90744e-06	4.7317e-06	down	PREDICTED: bark storage protein A [Cucumis melo]
CmoCh10G007160	2.02	0	0.83	0.001	-4.02862	0.0312501	0.0472645	down	-
CmoCh10G007640	105	43	2.94	1.26	-1.15773	1.7029e-15	6.95391e-15	down	PREDICTED: LOW QUALITY PROTEIN: serine/threonine-protein kinase tricorner [Cucumis melo]
CmoCh10G007770	13	5	2.15	0.88	-1.23082	0.00383851	0.00677226	down	PREDICTED: RING-H2 finger protein ATL52-like [Cucumis melo]
CmoCh10G007810	73.43	28.98	28.58	12.45	-1.20045	6.53623e-12	2.26589e-11	down	PREDICTED: mechanosensitive ion channel protein 10-like [Cucumis sativus]
CmoCh10G007970	3	0	0.12	0.001	-4.58381	0.00390629	0.00682066	down	PREDICTED: serine/threonine-protein kinase At5g01020 [Prunus mume]
CmoCh10G008120	25	9	3.35	1.28	-1.33438	2.2375e-05	5.05083e-05	down	PREDICTED: ethylene-responsive transcription factor ERF017-like [Cucumis melo]
CmoCh10G008170	342	2	46.62	0.29	-7.20667	1.38939e-275	6.70605e-274	down	PREDICTED: 21 kDa protein [Cucumis sativus]
CmoCh10G008180	475	0	18.4	0.001	-11.8296	0	0	down	Pectinesterase domain-containing protein, partial [Cephalotus follicularis]
CmoCh10G008210	547	216	9.24	3.82	-1.21201	2.29255e-80	3.26357e-79	down	PREDICTED: sucrose synthase [Cucumis melo]// XP_008450969.1 PREDICTED: sucrose synthase [Cucumis melo]// XP_008450970.1 PREDICTED: sucrose synthase [Cucumis melo]
CmoCh10G008550	3	0	2.46	0.001	-4.58381	0.00390629	0.00682066	down	-
CmoCh10G008880	22	8	14.18	5.85	-1.31854	4.32238e-05	9.52694e-05	down	-
CmoCh10G009060	105	0	3.84	0.001	-9.65344	3.67022e-88	5.68904e-87	down	PREDICTED: aluminum-activated malate transporter 2-like [Cucumis melo]
CmoCh10G009070	2	0	0.08	0.001	-4.02862	0.0312501	0.0472645	down	PREDICTED: aluminum-activated malate transporter 2-like [Cucumis melo]
CmoCh10G009110	2	0	0.08	0.001	-4.02862	0.0312501	0.0472645	down	PREDICTED: probable polyamine transporter At3g13620 [Cucumis melo]
CmoCh10G009220	27	5	2.61	0.51	-2.27781	5.78743e-11	1.91686e-10	down	PREDICTED: heat stress transcription factor B-4b-like [Cucumis melo]
CmoCh10G009300	85	31	138.09	60.11	-1.32382	1.42071e-15	5.82226e-15	down	hypothetical protein Csa_1G629040 [Cucumis sativus]
CmoCh10G009310	163	32	14.93	3.1	-2.21647	6.15755e-57	6.4995e-56	down	PREDICTED: AT-hook motif nuclear-localized protein 28-like [Cucumis melo]
CmoCh10G009450	2	0	0.07	0.001	-4.02862	0.0312501	0.0472645	down	PREDICTED: isoleucine N-monooxygenase 1-like [Cucumis melo]
CmoCh10G009740	17	7	6.62	3.01	-1.13869	0.00182058	0.00335665	down	PREDICTED: cyclin-dependent protein kinase inhibitor SMR3-like [Cicer arietinum]
CmoCh10G009810	10	1	1.8	0.19	-3.0498	2.55623e-06	6.27727e-06	down	PREDICTED: zinc finger A20 and AN1 domain-containing stress-associated protein 4-like [Cucumis melo]
CmoCh10G009900	3	0	0.1	0.001	-4.58381	0.00390629	0.00682066	down	reverse transcriptase [Corchorus capsularis]
CmoCh10G009940	112	14.93	3.69	0.52	-2.76266	1.67474e-50	1.61215e-49	down	PREDICTED: beta-glucosidase 12-like [Cucumis sativus]
CmoCh10G009970	185	68	7.51	2.9	-1.31436	1.12514e-31	7.56314e-31	down	silverleaf whitefly-induced protein 3 [Cucurbita pepo]
CmoCh10G010010	15	0	2.48	0.001	-6.85679	1.13715e-13	4.30433e-13	down	beta-D-glucoside glucohydrolase [Lotus japonicus]
CmoCh10G010020	1768.52	170.97	26.8	2.71	-3.24192	0	0	down	Lactase-phlorizin hydrolase [Cajanus cajan]
CmoCh10G010170	253	106	9.34	4.1	-1.12615	6.48263e-34	4.60943e-33	down	metal tolerance protein 4-like [Cucumis sativus]// AFJ24703.1 metal transport protein 8 [Cucumis sativus]
CmoCh10G010910	67	6	2.31	0.22	-3.32745	5.66632e-37	4.30678e-36	down	PREDICTED: serine/threonine-protein kinase At3g07070-like isoform X2 [Cucumis melo]
CmoCh10G010920	168	45	2.29	0.64	-1.76972	6.34043e-44	5.46924e-43	down	LOW QUALITY PROTEIN: zf-CCHC domain-containing protein, partial [Cephalotus follicularis]
CmoCh10G010970	2	0	0.29	0.001	-4.02862	0.0312501	0.0472645	down	Retrovirus-related Pol polyprotein from transposon TNT 1-94 [Cajanus cajan]
CmoCh10G011040	6.13	0	0.09	0.001	-5.55341	1.52593e-05	3.49815e-05	down	reverse transcriptase [Corchorus capsularis]
CmoCh10G011050	2	0	0.39	0.001	-4.02862	0.0312501	0.0472645	down	PREDICTED: histidine-containing phosphotransfer protein 1-like [Cucumis melo]
CmoCh10G011150	35	15	0.48	0.22	-1.08828	1.68733e-05	3.85339e-05	down	reverse transcriptase [Corchorus capsularis]
CmoCh10G011290	11.31	0	0.16	0.001	-6.41385	4.65722e-10	1.46204e-09	down	Transposon Ty3-I Gag-Pol polyprotein [Noccaea caerulescens]
CmoCh10G011370	1.79	0	0.03	0.001	-4.02862	0.0312501	0.0472645	down	pol protein [Cucumis melo subsp. melo]
CmoCh10G011450	5	0	48.12	0.001	-5.29651	6.10368e-05	0.00013234	down	PREDICTED: 39S ribosomal protein L45, mitochondrial isoform X2 [Cucumis sativus]
CmoCh10G011570	2	0	0.19	0.001	-4.02862	0.0312501	0.0472645	down	hypothetical protein Csa_1G570130 [Cucumis sativus]
CmoCh10G012280	7.01	0	0.12	0.001	-5.77141	1.90744e-06	4.7317e-06	down	PREDICTED: kinesin-4 isoform X1 [Cucumis melo]
CmoCh10G012320	203	60	8.06	2.5	-1.62846	2.64424e-47	2.4195e-46	down	PREDICTED: probable protein phosphatase 2C 34 [Cucumis melo]
CmoCh11G000100	61	17	5.01	1.47	-1.70822	5.98123e-16	2.48594e-15	down	PREDICTED: NAC domain-containing protein 83 [Prunus mume]
CmoCh11G000260	852	196	40.21	9.72	-1.9913	2.1406e-253	9.46949e-252	down	PREDICTED: squamosa promoter-binding-like protein 13A [Cucumis melo]// XP_008464415.1 PREDICTED: squamosa promoter-binding-like protein 13A [Cucumis melo]// XP_008464416.1 PREDICTED: squamosa promoter-binding-like protein 13A [Cucumis melo]// XP_008464417.1 PREDICTED: squamosa promoter-binding-like protein 13A [Cucumis melo]
CmoCh11G000480	4	0	2.49	0.001	-4.98373	0.00048829	0.000958718	down	-
CmoCh11G000590	22	6	0.79	0.23	-1.72652	7.39348e-07	1.89302e-06	down	PREDICTED: DELLA protein GAI-like [Cucumis sativus]
CmoCh11G000610	106	36	3.01	1.07	-1.42695	4.19525e-21	2.10757e-20	down	PREDICTED: leucine-rich repeat receptor-like serine/threonine/tyrosine-protein kinase SOBIR1 [Cucumis melo]
CmoCh11G000620	248	89	5.56	2.09	-1.34925	8.50819e-44	7.32082e-43	down	PREDICTED: protein SIEVE ELEMENT OCCLUSION B-like isoform X1 [Cucumis melo]
CmoCh11G000700	6	0	0.23	0.001	-5.55341	1.52593e-05	3.49815e-05	down	PREDICTED: protein DETOXIFICATION 16-like isoform X1 [Cucumis melo]
CmoCh11G000860	528	83	20.05	3.31	-2.5396	3.37478e-212	1.23354e-210	down	DUF239 domain-containing protein/DUF4409 domain-containing protein [Cephalotus follicularis]
CmoCh11G001070	301	116	4.43	1.78	-1.24674	6.61122e-47	6.01139e-46	down	PREDICTED: probable alpha,alpha-trehalose-phosphate synthase [UDP-forming] 10 [Cucumis melo]
CmoCh11G001190	78.49	7.03	5.03	0.48	-3.32801	2.27363e-42	1.90633e-41	down	PREDICTED: peroxidase 41-like [Cucumis melo]
CmoCh11G001200	153.17	11	9.82	0.74	-3.65556	6.90765e-89	1.07739e-87	down	PREDICTED: peroxidase 41-like [Cucumis melo]
CmoCh11G001660	68	17	6.92	1.83	-1.86462	6.15377e-20	2.97019e-19	down	PREDICTED: protein RKD1-like [Cucumis melo]
CmoCh11G001760	113	17	4.91	0.78	-2.59624	1.15239e-47	1.06149e-46	down	PREDICTED: LOW QUALITY PROTEIN: NAC domain-containing protein 100-like [Cucumis melo]
CmoCh11G001830	11	4	1.2	0.46	-1.30596	0.00660914	0.0111994	down	PREDICTED: pentatricopeptide repeat-containing protein At5g61370, mitochondrial [Cucumis melo]
CmoCh11G001870	434.05	181	14.7	6.43	-1.13315	9.19992e-58	9.86959e-57	down	PREDICTED: formin-like protein 20 [Cucumis sativus]
CmoCh11G001890	1057	481	11.45	5.45	-1.00765	5.37677e-119	1.092e-117	down	PREDICTED: formin-like protein 20 [Cucumis sativus]
CmoCh11G001920	237.43	74	33.84	11.25	-1.54972	4.39119e-51	4.25531e-50	down	PREDICTED: dCTP pyrophosphatase 1-like [Cucumis melo]
CmoCh11G001940	84	20	4.14	1.04	-1.936	1.04552e-25	6.01805e-25	down	PREDICTED: transcription factor UNE10 [Cucumis melo]
CmoCh11G002090	12	5	0.24	0.1	-1.11654	0.0109741	0.0180619	down	PREDICTED: respiratory burst oxidase homolog protein F-like isoform X1 [Cucumis sativus]
CmoCh11G002140	14	2	0.97	0.15	-2.60901	6.24134e-07	1.60473e-06	down	PREDICTED: transcription factor TCP5 [Cucumis melo]// XP_008453285.1 PREDICTED: transcription factor TCP5 [Cucumis melo]
CmoCh11G002230	14	2	0.55	0.08	-2.60901	6.24134e-07	1.60473e-06	down	PREDICTED: COBRA-like protein 4 [Cucumis melo]
CmoCh11G002320	93	38	7.58	3.27	-1.16069	4.89917e-14	1.88445e-13	down	Protein bicaudal C-1-B-like protein [Morus notabilis]// EXB89107.1 Protein bicaudal C-1-B-like protein [Morus notabilis]
CmoCh11G002390	2	0	0.71	0.001	-4.02862	0.0312501	0.0472645	down	PREDICTED: trigger factor-like [Ziziphus jujuba]// XP_015871383.1 PREDICTED: trigger factor-like [Ziziphus jujuba]
CmoCh11G002530	75	29	18.67	7.82	-1.23937	8.52292e-13	3.09353e-12	down	PREDICTED: oleosin 1 [Cucumis melo]
CmoCh11G003060	116	52	2.96	1.39	-1.02781	2.32567e-14	9.0877e-14	down	PREDICTED: actin-interacting protein 1-2 [Cucumis melo]
CmoCh11G003430	351	118	17.54	6.2	-1.44372	9.43143e-68	1.15576e-66	down	PREDICTED: RING-H2 finger protein ATL43 isoform X1 [Cucumis melo]
CmoCh11G003480	5	0	0.39	0.001	-5.29651	6.10368e-05	0.00013234	down	PREDICTED: homeobox-leucine zipper protein HOX18-like [Cucumis melo]
CmoCh11G003490	3.09	0	0.76	0.001	-4.58381	0.00390629	0.00682066	down	PREDICTED: uncharacterized protein LOC101205829 [Cucumis sativus]// KGN65505.1 hypothetical protein Csa_1G427550 [Cucumis sativus]
CmoCh11G003500	41	14	5.2	1.89	-1.41448	9.74344e-09	2.8302e-08	down	Armadillo-like helical [Cynara cardunculus var. scolymus]
CmoCh11G003580	8	0	85.65	0.001	-5.96075	2.38434e-07	6.31669e-07	down	BnaC03g68210D [Brassica napus]
CmoCh11G003710	14	4	0.79	0.24	-1.65025	0.000268566	0.000543481	down	Galactose mutarotase-like superfamily protein isoform 1 [Theobroma cacao]// EOY31926.1 Galactose mutarotase-like superfamily protein isoform 1 [Theobroma cacao]
CmoCh11G003920	524	192	18.62	7.15	-1.31988	1.14818e-87	1.77376e-86	down	PREDICTED: AAA-ATPase At5g57480-like [Cucumis melo]
CmoCh11G003930	34	6	2.16	0.4	-2.35155	1.53613e-13	5.77331e-13	down	PREDICTED: hydroxyproline O-galactosyltransferase GALT3 [Cucumis melo]
CmoCh11G004010	3	0	0.19	0.001	-4.58381	0.00390629	0.00682066	down	PREDICTED: probable xyloglucan endotransglucosylase/hydrolase protein 23 [Vigna radiata var. radiata]
CmoCh11G004060	37	15	2.49	1.06	-1.16816	2.43784e-06	6.0015e-06	down	PREDICTED: F-box protein PP2-B10-like isoform X1 [Cucumis melo]// XP_016901363.1 PREDICTED: F-box protein PP2-B10-like isoform X1 [Cucumis melo]
CmoCh11G004090	42	1	2.76	0.07	-5.10595	2.43594e-31	1.62593e-30	down	PREDICTED: transcription factor RAX2-like [Cucumis sativus]
CmoCh11G004130	114	10	2.76	0.25	-3.36744	2.72708e-62	3.11861e-61	down	PREDICTED: probable 1-deoxy-D-xylulose-5-phosphate synthase 2, chloroplastic [Cucumis melo]
CmoCh11G004290	437	42	13.46	1.36	-3.24746	1.25191e-226	4.83907e-225	down	PREDICTED: WAT1-related protein At4g30420-like [Cucumis melo]
CmoCh11G004400	1130	302	8.79	2.45	-1.77526	2.27270197086973e-322	1.29939264856248e-320	down	PREDICTED: protein TSS [Cucumis melo]
CmoCh11G004570	60	24	2.46	1.03	-1.18986	7.22223e-10	2.24023e-09	down	PREDICTED: serine carboxypeptidase 24-like isoform X1 [Cucumis melo]
CmoCh11G004620	12	0	0.53	0.001	-6.53797	5.82167e-11	1.92658e-10	down	PREDICTED: BTB/POZ domain-containing protein At2g24240 [Cucumis melo]
CmoCh11G004780	26	11	2.89	1.3	-1.10461	0.000172421	0.000356189	down	DUF679 domain-containing protein [Cephalotus follicularis]
CmoCh11G004800	18	7	0.93	0.38	-1.22054	0.000642884	0.00124616	down	PREDICTED: chitotriosidase-1-like [Cucumis melo]
CmoCh11G004910	9	3	2.28	0.82	-1.42136	0.0113314	0.0186121	down	stress induced protein [Morella rubra]
CmoCh11G004950	217	81	5.74	2.24	-1.2924	3.59582e-36	2.68639e-35	down	glycerol-3-phosphate transporter family protein [Populus trichocarpa]// EEF03141.1 glycerol-3-phosphate transporter family protein [Populus trichocarpa]
CmoCh11G005040	8.7	1.88	0.24	0.05	-1.97896	0.00053508	0.0010461	down	reverse transcriptase [Corchorus capsularis]
CmoCh11G005180	43	13	1.87	0.59	-1.58896	1.36089e-10	4.4104e-10	down	PREDICTED: probable serine/threonine-protein kinase kinX isoform X2 [Nicotiana attenuata]
CmoCh11G005260	1837	787	45.38	20.36	-1.09476	2.80331e-236	1.14289e-234	down	PREDICTED: probable receptor-like protein kinase At5g15080 isoform X3 [Cucumis melo]
CmoCh11G005300	79	32	4.32	1.84	-1.17275	3.26617e-12	1.14845e-11	down	PREDICTED: beta-1,4-mannosyl-glycoprotein 4-beta-N-acetylglucosaminyltransferase [Cucumis melo]// XP_008443971.1 PREDICTED: beta-1,4-mannosyl-glycoprotein 4-beta-N-acetylglucosaminyltransferase [Cucumis melo]// XP_008443972.1 PREDICTED: beta-1,4-mannosyl-glycoprotein 4-beta-N-acetylglucosaminyltransferase [Cucumis melo]// XP_016899825.1 PREDICTED: beta-1,4-mannosyl-glycoprotein 4-beta-N-acetylglu…
CmoCh11G005320	27	11	4.07	1.77	-1.15879	6.44696e-05	0.000139388	down	PREDICTED: WD repeat-containing protein 11 isoform X3 [Cucumis sativus]
CmoCh11G005390	11	0	2.18	0.001	-6.41385	4.65722e-10	1.46204e-09	down	PREDICTED: CBL-interacting serine/threonine-protein kinase 24 isoform X2 [Cucumis melo]
CmoCh11G005400	59	15	8.28	2.24	-1.83946	2.21472e-17	9.77697e-17	down	PREDICTED: EPIDERMAL PATTERNING FACTOR-like protein 8 [Cucumis sativus]
CmoCh11G005420	288	107	12.9	5.04	-1.29946	8.28143e-48	7.63843e-47	down	DUF4050 domain-containing protein [Cephalotus follicularis]
CmoCh11G005440	66	13	7.4	1.55	-2.20557	6.92128e-24	3.76829e-23	down	Outward-rectifying potassium channel 4 -like protein [Gossypium arboreum]
CmoCh11G005450	79	16	9.31	2	-2.16739	1.15459e-27	7.03683e-27	down	PREDICTED: ethylene-responsive transcription factor WIN1-like [Cucumis melo]
CmoCh11G005490	902	225	33.5	8.77	-1.8746	8.29794e-248	3.57889e-246	down	PREDICTED: 3-ketoacyl-CoA synthase 11 [Cucumis melo]
CmoCh11G005840	211	82	3.46	1.4	-1.2343	8.50273e-33	5.88191e-32	down	PREDICTED: protein argonaute PNH1 isoform X1 [Cucumis sativus]
CmoCh11G005950	44	14	1.05	0.35	-1.51605	3.02928e-10	9.6294e-10	down	PREDICTED: probable sulfate transporter 3.5 [Cucumis melo]
CmoCh11G005970	154	28	8.04	1.54	-2.32647	3.42719e-57	3.63282e-56	down	copper-binding family protein [Populus trichocarpa]// EEF03537.1 copper-binding family protein [Populus trichocarpa]
CmoCh11G006070	119	31	8.13	2.23	-1.80861	2.05449e-32	1.4099e-31	down	PREDICTED: mucin-17 [Prunus mume]
CmoCh11G006120	5	0	0.19	0.001	-5.29651	6.10368e-05	0.00013234	down	indole-3-pyruvate monooxygenase YUCCA2 [Cucumis melo]// AJO72445.1 YUCCA type flavin monooxygenase 2 [Cucumis melo]
CmoCh11G006330	1649	704	48.63	21.76	-1.09977	5.49221e-214	2.02631e-212	down	PREDICTED: transcription factor bHLH68 isoform X1 [Cucumis melo]
CmoCh11G006640	339	112	13.42	4.65	-1.46876	4.36117e-67	5.29255e-66	down	PREDICTED: protein IQ-DOMAIN 14-like [Cucumis melo]
CmoCh11G006670	184	41	739.63	204.7	-2.03479	5.64298e-58	6.07265e-57	down	PREDICTED: programmed cell death protein 4-like [Gossypium hirsutum]
CmoCh11G006690	25	7	1.77	0.52	-1.69156	2.26134e-07	6.00929e-07	down	Oxidative stress 3 [Theobroma cacao]
CmoCh11G006930	94	33	5.88	2.17	-1.37894	3.44267e-18	1.56284e-17	down	PREDICTED: transcription factor MYB1R1 [Theobroma cacao]
CmoCh11G007150	23	3	0.75	0.1	-2.76239	1.69745e-11	5.76984e-11	down	PREDICTED: IQ domain-containing protein IQM1 isoform X1 [Cucumis melo]
CmoCh11G007230	90	40	3.87	1.8	-1.03967	1.23508e-11	4.22162e-11	down	Harbinger transposase-derived nuclease [Corchorus olitorius]
CmoCh11G007290	52.72	0	0.71	0.001	-8.66887	6.85216e-45	6.02378e-44	down	OSJNBb0026E15.10 [Oryza sativa Japonica Group]
CmoCh11G007350	350	153	168.26	82.07	-1.06519	1.10127e-42	9.27601e-42	down	PREDICTED: mechanosensitive ion channel protein 10-like [Cucumis sativus]
CmoCh11G007420	28	8	9.79	3.07	-1.66464	9.37821e-08	2.55348e-07	down	-
CmoCh11G007650	29	2	3.95	0.29	-3.65272	7.12201e-18	3.19366e-17	down	PREDICTED: ethylene-responsive transcription factor ERF017-like [Cucumis melo]
CmoCh11G007680	259	83	5.08	1.7	-1.51238	4.88608e-54	4.93985e-53	down	PREDICTED: sucrose synthase [Cucumis melo]// XP_008450969.1 PREDICTED: sucrose synthase [Cucumis melo]// XP_008450970.1 PREDICTED: sucrose synthase [Cucumis melo]
CmoCh11G008480	60	21	1.02	0.37	-1.38148	5.52552e-12	1.92325e-11	down	PREDICTED: transcription factor bHLH122 isoform X1 [Cucumis melo]// XP_008450444.1 PREDICTED: transcription factor bHLH122 isoform X1 [Cucumis melo]// XP_016900867.1 PREDICTED: transcription factor bHLH122 isoform X1 [Cucumis melo]
CmoCh11G008650	45	13	1.73	0.53	-1.65435	1.14883e-11	3.93413e-11	down	DUF604 domain-containing protein [Cephalotus follicularis]
CmoCh11G008940	8	1	4.8	0.68	-2.73251	8.79809e-05	0.000187486	down	hypothetical protein Csa_1G629000 [Cucumis sativus]
CmoCh11G009020	115	47	7.45	3.21	-1.16083	4.42794e-17	1.92894e-16	down	PREDICTED: protein CASP isoform X1 [Vitis vinifera]
CmoCh11G009150	822	251	32.54	10.43	-1.58295	9.27085e-179	2.80774e-177	down	PREDICTED: probable polyamine transporter At3g13620 [Cucumis melo]
CmoCh11G009170	5	1	0.34	0.07	-2.06827	0.012726	0.0207238	down	PREDICTED: aluminum-activated malate transporter 2 [Cucumis sativus]
CmoCh11G009190	2	0	0.56	0.001	-4.02862	0.0312501	0.0472645	down	PREDICTED: aluminum-activated malate transporter 2-like [Cucumis melo]
CmoCh11G009240	9	3	0.46	0.16	-1.42136	0.0113314	0.0186121	down	PREDICTED: E3 ubiquitin-protein ligase PUB22-like [Cucumis melo]
CmoCh11G009740	179	28	13.26	2.19	-2.54333	3.55835e-73	4.65881e-72	down	PREDICTED: germin-like protein subfamily 1 member 17 [Cucumis sativus]// KGN66715.1 Rhicadhesin receptor [Cucumis sativus]
CmoCh11G009810	6	1	1.81	0.33	-2.32517	0.00257689	0.00466403	down	-
CmoCh11G009970	2	0	0.29	0.001	-4.02862	0.0312501	0.0472645	down	PREDICTED: ankyrin-2-like [Jatropha curcas]
CmoCh11G010190	3	0	1.09	0.001	-4.58381	0.00390629	0.00682066	down	cytochrome b6, partial (mitochondrion) [Cocos nucifera]// AOX13006.1 cytochrome b6, partial (mitochondrion) [Cocos nucifera]
CmoCh11G010200	28	11	1.56	0.64	-1.21101	2.33289e-05	5.2584e-05	down	PREDICTED: cysteine synthase-like [Cucumis melo]
CmoCh11G010240	1298.65	0	69.33	0.001	-13.2807	0	0	down	PREDICTED: protein EXORDIUM-like 2 [Cucumis melo]
CmoCh11G010250	2.35	0	0.12	0.001	-4.02862	0.0312501	0.0472645	down	PREDICTED: protein EXORDIUM-like 2 [Cucumis melo]
CmoCh11G010350	23	5	1.82	0.42	-2.0477	1.38932e-08	3.99935e-08	down	PREDICTED: NAC domain-containing protein 100 [Vitis vinifera]
CmoCh11G010430	9	3	0.35	0.12	-1.42136	0.0113314	0.0186121	down	PREDICTED: vacuolar amino acid transporter 1-like isoform X2 [Cucumis melo]
CmoCh11G010440	571	183	21.69	7.29	-1.51299	7.37137e-117	1.46471e-115	down	silicon transporter 1 [Cucurbita moschata]
CmoCh11G010670	196	79	7.47	3.16	-1.18167	9.36176e-29	5.87722e-28	down	actin cross-linking protein [Medicago truncatula]// AET03034.2 actin cross-linking protein [Medicago truncatula]
CmoCh11G010730	2	0	0.37	0.001	-4.02862	0.0312501	0.0472645	down	PREDICTED: MAR-binding filament-like protein 1 [Malus domestica]
CmoCh11G011070	436	35	25.71	2.17	-3.50638	3.74135e-242	1.57663e-240	down	PREDICTED: B-box zinc finger protein 20-like isoform X1 [Cucumis melo]
CmoCh11G011460	2	0	19.25	0.001	-4.02862	0.0312501	0.0472645	down	-
CmoCh11G011820	2656	267	228.91	24.32	-3.18573	0	0	down	Drm3-like protein isoform 1 [Theobroma cacao]
CmoCh11G011980	2	0	0.09	0.001	-4.02862	0.0312501	0.0472645	down	PREDICTED: probable mitochondrial saccharopine dehydrogenase-like oxidoreductase At5g39410 [Cucumis melo]
CmoCh11G012120	20	8	2.01	0.85	-1.18189	0.000378397	0.000755041	down	PREDICTED: germin-like protein subfamily 2 member 1 [Juglans regia]
CmoCh11G012910	127	16	5.78	0.77	-2.85139	4.08834e-59	4.48189e-58	down	PREDICTED: nicotianamine synthase-like [Cucumis melo]
CmoCh11G013010	2	0	0.07	0.001	-4.02862	0.0312501	0.0472645	down	OSJNBb0034I13.10 [Oryza sativa Japonica Group]
CmoCh11G013060	7.87	0	0.49	0.001	-5.96075	2.38434e-07	6.31669e-07	down	gag-protease polyprotein [Cucumis melo subsp. melo]
CmoCh11G013100	373	124	10.97	3.82	-1.45991	4.92302e-73	6.42416e-72	down	PREDICTED: polyol transporter 5 [Cucumis melo]
CmoCh11G013130	34	9	4.38	1.23	-1.776	5.96992e-10	1.86142e-09	down	PREDICTED: polyol transporter 5-like [Cucumis melo]
CmoCh11G013220	98	30	8.16	2.64	-1.57597	1.6358e-22	8.54646e-22	down	PREDICTED: transcription termination factor MTEF1, chloroplastic [Cucumis melo]
CmoCh11G013280	29	7	1.15	0.29	-1.90465	2.40319e-09	7.22662e-09	down	allene oxide synthase 2-like [Cucumis melo]// AAK54282.1 fatty acid 9-hydroperoxide lyase [Cucumis melo]
CmoCh11G013430	8	1	5.16	0.73	-2.73251	8.79809e-05	0.000187486	down	-
CmoCh11G013540	10	4	1.3	0.55	-1.17014	0.0195211	0.0309838	down	PREDICTED: cyclin-dependent kinase inhibitor 7 isoform X3 [Cucumis sativus]
CmoCh11G013780	541	107	38.66	8.06	-2.20871	1.46609e-184	4.61251e-183	down	PREDICTED: protein IRX15-LIKE-like [Cucumis melo]
CmoCh11G013790	2389	0	101.51	0.001	-14.1597	0	0	down	leucine-rich repeat family protein [Citrus trifoliata]
CmoCh11G013800	4812	0	2127.31	0.001	-15.1699	0	0	down	PREDICTED: protein RALF-like 19 [Cucumis melo]
CmoCh11G013860	633	213	21.73	7.67	-1.4428	1.08366e-120	2.23379e-119	down	cyclin D3.2 protein [Lagenaria siceraria]
CmoCh11G014150	16	2	2.14	0.29	-2.79999	4.00398e-08	1.11792e-07	down	PREDICTED: zinc finger protein ZAT10-like [Cucumis melo]
CmoCh11G014250	2	0	0.65	0.001	-4.02862	0.0312501	0.0472645	down	PREDICTED: uncharacterized protein LOC103495318 [Cucumis melo]
CmoCh11G014260	202	86	22.66	10.24	-1.10283	1.26817e-26	7.49692e-26	down	PsaN domain-containing protein [Cephalotus follicularis]
CmoCh11G014470	540	210	10.71	4.36	-1.23406	1.22832e-81	1.76315e-80	down	PREDICTED: K(+) efflux antiporter 3, chloroplastic [Cucumis melo]
CmoCh11G014540	16	1	1.5	0.1	-3.72088	6.98274e-11	2.29784e-10	down	PREDICTED: dehydrodolichyl diphosphate synthase 6 [Cucumis sativus]
CmoCh11G014630	14	6	0.6	0.27	-1.0793	0.00864201	0.0144497	down	PREDICTED: guanosine nucleotide diphosphate dissociation inhibitor At5g09550 [Cucumis melo]
CmoCh11G014910	3750	1598	209.26	93.82	-1.10252	0	0	down	light-harvesting complex II protein [Citrullus lanatus subsp. vulgaris]
CmoCh11G015000	51.83	11.8	2.89	0.69	-1.97676	9.41113e-17	4.0514e-16	down	PREDICTED: 2-alkenal reductase (NADP(+)-dependent)-like [Cucumis melo]
CmoCh11G015010	134	54	10.4	4.42	-1.18138	4.90861e-20	2.37753e-19	down	PREDICTED: NAC domain-containing protein 104 [Cucumis melo]
CmoCh11G015320	21	4	1.19	0.24	-2.23076	1.39406e-08	4.01131e-08	down	PREDICTED: fasciclin-like arabinogalactan protein 19 [Cucumis melo]
CmoCh11G015390	7	1	0.7	0.11	-2.54317	0.000488299	0.000958718	down	PREDICTED: 7-deoxyloganetin glucosyltransferase-like [Cucumis melo]
CmoCh11G015480	1.73	0	0.06	0.001	-4.02862	0.0312501	0.0472645	down	phloem filament protein [Cucurbita maxima]
CmoCh11G015570	537	160	61.87	19.57	-1.61808	3.10081e-121	6.43996e-120	down	DUF761 domain-containing protein [Cephalotus follicularis]
CmoCh11G015590	6	1	15.95	3.25	-2.32517	0.00257689	0.00466403	down	-
CmoCh11G015610	4	0	3.14	0.001	-4.98373	0.00048829	0.000958718	down	-
CmoCh11G015780	40	15	1.71	0.67	-1.28025	1.11783e-07	3.02864e-07	down	PREDICTED: mitochondrial phosphate carrier protein 3, mitochondrial [Cucumis melo]
CmoCh11G015860	2	0	11.62	0.001	-4.02862	0.0312501	0.0472645	down	-
CmoCh11G016690	2	0	0.4	0.001	-4.02862	0.0312501	0.0472645	down	PREDICTED: oleosin 18.2 kDa-like [Cucumis sativus]
CmoCh11G016800	31	6	1.12	0.23	-2.21881	3.1005e-12	1.09187e-11	down	PREDICTED: polygalacturonase At1g48100 [Cucumis melo]
CmoCh11G017010	57	17	4.23	1.33	-1.61058	2.90605e-14	1.12947e-13	down	hypothetical protein Csa_6G524620 [Cucumis sativus]
CmoCh11G017050	127	45	5.28	1.96	-1.36645	1.00069e-23	5.4236e-23	down	PREDICTED: WAT1-related protein At5g40230-like [Cucumis melo]
CmoCh11G017200	238	93	8.59	3.52	-1.22656	1.86973e-36	1.40523e-35	down	calcium-binding EF hand family protein [Populus trichocarpa]// EEE87699.2 calcium-binding EF hand family protein [Populus trichocarpa]
CmoCh11G017240	123	27	25.39	6	-2.05475	1.12251e-39	8.91792e-39	down	BnaA03g07800D [Brassica napus]
CmoCh11G017450	52	3	7.19	0.44	-3.93472	1.31954e-32	9.08708e-32	down	WSKP1 protein [Citrus reticulata]
CmoCh11G017580	2877	1277	75.19	34.95	-1.0437	0	0	down	PREDICTED: serine/threonine-protein kinase HT1 isoform X1 [Cucumis sativus]
CmoCh11G017650	384	172	20.27	9.55	-1.03015	2.80174e-44	2.43353e-43	down	late embryogenesis abundant protein [Medicago truncatula]// KEH30613.1 late embryogenesis abundant protein [Medicago truncatula]
CmoCh11G017680	3	0	0.26	0.001	-4.58381	0.00390629	0.00682066	down	PREDICTED: expansin-like A2 [Cucumis sativus]
CmoCh11G017700	44	0	3.17	0.001	-8.4011	3.82837e-37	2.92028e-36	down	PREDICTED: protein FEZ-like [Cucumis melo]
CmoCh11G017760	490	110	9.16	2.15	-2.02606	4.90618e-150	1.24164e-148	down	DUF632 domain-containing protein/DUF630 domain-containing protein [Cephalotus follicularis]
CmoCh11G018250	24	0	2.97	0.001	-7.53019	1.69514e-21	8.60685e-21	down	PREDICTED: AP-1 complex subunit sigma-2 [Cucumis melo]
CmoCh11G018350	5	1	0.73	0.15	-2.06827	0.012726	0.0207238	down	PREDICTED: fasciclin-like arabinogalactan protein 19 [Arachis duranensis]// XP_016166255.1 PREDICTED: fasciclin-like arabinogalactan protein 19 [Arachis ipaensis]
CmoCh11G018440	7.24	0	0.26	0.001	-5.77141	1.90744e-06	4.7317e-06	down	PREDICTED: cytochrome b561 and DOMON domain-containing protein At5g47530-like [Cucumis melo]
CmoCh11G018500	2	0	1.39	0.001	-4.02862	0.0312501	0.0472645	down	BnaA03g37860D [Brassica napus]
CmoCh11G018580	469	169	46.01	17.56	-1.34391	5.2938e-81	7.5712e-80	down	Glycine rich protein [Cucumis sativus]
CmoCh11G018600	20	0	2.28	0.001	-7.26871	6.9419e-18	3.11391e-17	down	-
CmoCh11G018900	2	0	0.11	0.001	-4.02862	0.0312501	0.0472645	down	PREDICTED: mitogen-activated protein kinase kinase kinase 2 [Cucumis melo]
CmoCh11G019150	195	44	18.29	4.37	-2.01691	2.46757e-60	2.74884e-59	down	PREDICTED: cysteine-rich repeat secretory protein 38-like [Cucumis melo]
CmoCh11G019160	269	87	58.61	20.44	-1.4992	2.66825e-55	2.75626e-54	down	PREDICTED: proline-rich receptor-like protein kinase PERK10 [Cucumis melo]
CmoCh11G019200	10	0	0.48	0.001	-6.27804	3.72569e-09	1.10838e-08	down	PREDICTED: transcription factor bHLH117 [Cucumis melo]
CmoCh11G019350	19	6	0.57	0.19	-1.51636	3.37739e-05	7.51621e-05	down	F-box/LRR-repeat protein [Morus notabilis]// EXB62299.1 F-box/LRR-repeat protein [Morus notabilis]
CmoCh11G019410	355	126	25.45	9.53	-1.36552	4.50518e-63	5.21911e-62	down	PREDICTED: ras-associated and pleckstrin homology domains-containing protein 1 [Malus domestica]
CmoCh11G019420	69	31	2.53	1.19	-1.02346	4.68848e-09	1.38851e-08	down	PREDICTED: F-box/kelch-repeat protein At1g16250-like [Cucumis melo]
CmoCh11G019470	4	0	0.51	0.001	-4.98373	0.00048829	0.000958718	down	PREDICTED: protein EPIDERMAL PATTERNING FACTOR 1 [Cucumis melo]
CmoCh11G019620	22	10	1	0.48	-1.00087	0.0019246	0.00353797	down	DUF506 domain-containing protein [Cephalotus follicularis]
CmoCh11G019770	555	126	31.84	7.61	-2.00999	6.07266e-168	1.71654e-166	down	PREDICTED: peroxidase P7-like [Cucumis melo]
CmoCh11G019920	168	60	20.57	7.81	-1.35564	2.18434e-30	1.42824e-29	down	PREDICTED: LOW QUALITY PROTEIN: ethylene-responsive transcription factor 4 [Cucumis melo]
CmoCh11G019940	704	73	32	3.49	-3.13947	0	0	down	PREDICTED: zinc finger CCCH domain-containing protein 2-like [Cucumis melo]
CmoCh11G019970	10679	3839.95	393.15	148.3	-1.34753	0	0	down	squamosa promoter binding-like protein [Betula platyphylla]
CmoCh11G020130	3	0	1.58	0.001	-4.58381	0.00390629	0.00682066	down	Embryo defective 1381 isoform 2 [Theobroma cacao]// EOX93338.1 Embryo defective 1381 isoform 2 [Theobroma cacao]
CmoCh11G020300	14	1	0.23	0.02	-3.5299	1.61863e-09	4.92215e-09	down	PREDICTED: protein EMBRYONIC FLOWER 1-like [Ziziphus jujuba]
CmoCh11G020370	119	29	51.22	13.85	-1.90445	6.36376e-35	4.60934e-34	down	PREDICTED: transcription factor PAR2-like [Cucumis melo]
CmoCh11G020410	27	5	0.89	0.17	-2.27781	5.78743e-11	1.91686e-10	down	PREDICTED: glycerol-3-phosphate acyltransferase 1 [Cucumis sativus]
CmoCh11G020530	807	274	23.58	8.39	-1.42996	2.61549e-151	6.66201e-150	down	PREDICTED: probable BOI-related E3 ubiquitin-protein ligase 3 [Cucumis sativus]
CmoCh11G020550	2	0	0.35	0.001	-4.02862	0.0312501	0.0472645	down	PREDICTED: LOB domain-containing protein 4 [Fragaria vesca subsp. vesca]
CmoCh11G020690	48	7	1.73	0.26	-2.62907	2.02476e-21	1.02615e-20	down	PREDICTED: zinc transporter 1 [Cucumis melo]
CmoCh12G000100	2	0	2.87	0.001	-4.02862	0.0312501	0.0472645	down	PREDICTED: pre-rRNA-processing protein TSR2 [Cucumis melo]
CmoCh12G000220	12	3	0.5	0.13	-1.83124	0.000247108	0.000502086	down	PREDICTED: L-tryptophan--pyruvate aminotransferase 1-like [Malus domestica]
CmoCh12G000360	1143.47	467	64.04	27.52	-1.16309	1.17948e-163	3.22806e-162	down	PREDICTED: protein HHL1, chloroplastic [Cucumis melo]
CmoCh12G000470	6	1	3.4	0.64	-2.32517	0.00257689	0.00466403	down	-
CmoCh12G000830	3	0	21.21	0.001	-4.58381	0.00390629	0.00682066	down	-
CmoCh12G001150	5732	1198	118.17	25.84	-2.13026	0	0	down	PREDICTED: probable beta-D-xylosidase 7 [Cucumis melo]
CmoCh12G001330	1157	212	23.62	4.53	-2.31956	0	0	down	Zinc finger family protein [Theobroma cacao]
CmoCh12G001400	82	28	2.59	0.93	-1.41831	1.14937e-16	4.93021e-16	down	PREDICTED: serine hydroxymethyltransferase 2, mitochondrial [Cucumis sativus]
CmoCh12G001510	34	14	2.41	1.05	-1.14534	6.81904e-06	1.61399e-05	down	PREDICTED: MADS-box protein SVP isoform X1 [Cucumis melo]
CmoCh12G001860	2	0	0.52	0.001	-4.02862	0.0312501	0.0472645	down	-
CmoCh12G001880	3	0	0.39	0.001	-4.58381	0.00390629	0.00682066	down	PREDICTED: EPIDERMAL PATTERNING FACTOR-like protein 2 [Cucumis melo]
CmoCh12G002190	74	29	1.84	0.76	-1.22004	2.37472e-12	8.41982e-12	down	indole-3-pyruvate monooxygenase YUCCA6 [Cucumis melo]// AJO67752.1 YUCCA type protein 6 [Cucumis melo]
CmoCh12G002360	108	30	4.35	1.27	-1.71597	9.64041e-28	5.88329e-27	down	Branch domain-containing protein [Cephalotus follicularis]
CmoCh12G002650	72	0	3.45	0.001	-9.10994	2.57906e-61	2.91665e-60	down	probable indole-3-pyruvate monooxygenase YUCCA4 [Cucumis melo]// AJO67750.1 YUCCA type protein 4 [Cucumis melo]
CmoCh12G002720	145	60	3.56	1.54	-1.14341	1.39561e-20	6.90167e-20	down	PREDICTED: probable boron transporter 6 isoform X3 [Cucumis melo]// XP_008445159.1 PREDICTED: probable boron transporter 6 isoform X3 [Cucumis melo]
CmoCh12G002740	2	0	0.23	0.001	-4.02862	0.0312501	0.0472645	down	PREDICTED: tRNA (cytosine(38)-C(5))-methyltransferase isoform X2 [Cucumis melo]
CmoCh12G002840	2	0	0.15	0.001	-4.02862	0.0312501	0.0472645	down	BnaA09g08110D [Brassica napus]
CmoCh12G002920	43	3	5.29	0.39	-3.6613	1.96603e-26	1.15605e-25	down	PREDICTED: auxin-responsive protein IAA29-like [Cucumis melo]
CmoCh12G003100	20	7	2.28	0.85	-1.37151	7.01176e-05	0.000151055	down	PREDICTED: deSI-like protein At4g17486 [Cucumis melo]
CmoCh12G003180	1171	399	27.53	9.82	-1.42497	1.80714e-234	7.27078e-233	down	PREDICTED: BTB/POZ domain-containing protein NPY1 [Cucumis melo]// XP_008445265.1 PREDICTED: BTB/POZ domain-containing protein NPY1 [Cucumis melo]
CmoCh12G003350	5146	576	360.6	42.56	-3.03101	0	0	down	PREDICTED: glutathione S-transferase F11-like [Cucumis melo]
CmoCh12G003370	20	3	0.94	0.15	-2.56198	2.36233e-09	7.11228e-09	down	PREDICTED: ornithine decarboxylase-like [Cucumis melo]
CmoCh12G003380	502	132	21.77	6.01	-1.79818	3.36777e-131	7.44909e-130	down	PREDICTED: thioredoxin-like protein CDSP32, chloroplastic [Cucumis melo]
CmoCh12G003450	4	0	0.22	0.001	-4.98373	0.00048829	0.000958718	down	PREDICTED: peroxidase 64-like [Gossypium hirsutum]
CmoCh12G003660	11	4	6.38	2.62	-1.30596	0.00660914	0.0111994	down	PREDICTED: auxin-induced protein 15A-like [Cucumis melo]
CmoCh12G003780	87	17	1.49	0.31	-2.2195	2.7814e-31	1.85247e-30	down	PREDICTED: kinesin-like protein NACK1 [Cucumis melo]
CmoCh12G003810	442	25	38.23	2.29	-4.00955	3.347e-272	1.60145e-270	down	PREDICTED: protein SHI RELATED SEQUENCE 5-like [Cucumis melo]
CmoCh12G003830	207	8	5.29	0.21	-4.54497	4.38777e-140	1.04247e-138	down	PREDICTED: V-type proton ATPase subunit a2-like [Nicotiana tabacum]
CmoCh12G004260	9	2	1.08	0.26	-1.97896	0.00053508	0.0010461	down	PREDICTED: zinc finger and BTB domain-containing protein 47 [Prunus mume]
CmoCh12G004470	3	0	3.84	0.001	-4.58381	0.00390629	0.00682066	down	hypothetical protein Csa_2G360760 [Cucumis sativus]
CmoCh12G004570	103	46	9.6	4.54	-1.03298	6.20105e-13	2.26629e-12	down	PREDICTED: transcription factor MYB44-like [Cucumis melo]
CmoCh12G004720	38.64	9.57	3.46	0.91	-1.82312	8.50396e-12	2.93255e-11	down	PREDICTED: BRI1 kinase inhibitor 1-like [Cucumis melo]
CmoCh12G004810	2	0	0.41	0.001	-4.02862	0.0312501	0.0472645	down	PREDICTED: calcium-binding protein-like [Cucumis melo]
CmoCh12G005080	2	0	0.08	0.001	-4.02862	0.0312501	0.0472645	down	LRR-family protein [Cucumis melo subsp. melo]
CmoCh12G005330	13	4	1.43	0.47	-1.54436	0.000621094	0.0012057	down	PREDICTED: zinc finger protein ZAT10-like [Cucumis melo]
CmoCh12G005460	2	0	0.51	0.001	-4.02862	0.0312501	0.0472645	down	kinesin-related protein 11 [Dorcoceras hygrometricum]
CmoCh12G005480	1909	550	46.02	13.88	-1.66706	0	0	down	PREDICTED: growth-regulating factor 6-like [Cucumis melo]
CmoCh12G005500	233	90	4.76	1.92	-1.24319	1.25651e-36	9.47455e-36	down	PREDICTED: LOW QUALITY PROTEIN: AP2-like ethylene-responsive transcription factor ANT [Cucumis melo]
CmoCh12G005750	12	2	0.71	0.12	-2.38884	1.50987e-05	3.47317e-05	down	PREDICTED: myb-like protein I isoform X1 [Cucumis melo]
CmoCh12G005870	10	4	1.36	0.58	-1.17014	0.0195211	0.0309838	down	BnaC09g44660D [Brassica napus]
CmoCh12G005940	4	0	0.39	0.001	-4.98373	0.00048829	0.000958718	down	PREDICTED: probable WRKY transcription factor 50 isoform X1 [Cucumis melo]
CmoCh12G005950	5	0	2.31	0.001	-5.29651	6.10368e-05	0.00013234	down	-
CmoCh12G006080	27	0	7.1	0.001	-7.69925	6.62265e-24	3.60855e-23	down	PREDICTED: WD repeat-containing protein DWA2-like isoform X1 [Cucumis melo]
CmoCh12G006090	1.91	0	0.11	0.001	-4.02862	0.0312501	0.0472645	down	reverse transcriptase [Corchorus capsularis]
CmoCh12G006210	492	157	18.54	6.21	-1.51914	2.02399e-101	3.51489e-100	down	PREDICTED: pentatricopeptide repeat-containing protein At2g01860 [Cucumis melo]// XP_008462181.1 PREDICTED: pentatricopeptide repeat-containing protein At2g01860 [Cucumis melo]// XP_008462189.1 PREDICTED: pentatricopeptide repeat-containing protein At2g01860 [Cucumis melo]// XP_016902994.1 PREDICTED: pentatricopeptide repeat-containing protein At2g01860 [Cucumis melo]// XP_016902996.1 PREDICTED: …
CmoCh12G006300	4	0	7.93	0.001	-4.98373	0.00048829	0.000958718	down	-
CmoCh12G006340	3	0	0.11	0.001	-4.58381	0.00390629	0.00682066	down	PREDICTED: pectate lyase-like [Cucumis melo]
CmoCh12G006450	6	1	1.31	0.23	-2.32517	0.00257689	0.00466403	down	PREDICTED: hypersensitive-induced response protein 2 [Tarenaya hassleriana]// XP_010551506.1 PREDICTED: hypersensitive-induced response protein 2 [Tarenaya hassleriana]// XP_010551508.1 PREDICTED: hypersensitive-induced response protein 2 [Tarenaya hassleriana]// XP_010551509.1 PREDICTED: hypersensitive-induced response protein 2 [Tarenaya hassleriana]
CmoCh12G006940	3	0	0.52	0.001	-4.58381	0.00390629	0.00682066	down	hypothetical protein Csa_1G434180 [Cucumis sativus]
CmoCh12G007030	39	17	2.3	1.06	-1.06462	5.81673e-06	1.38341e-05	down	Retrotransposable element Tf2 [Cajanus cajan]
CmoCh12G007050	6	0	0.25	0.001	-5.55341	1.52593e-05	3.49815e-05	down	polyprotein [Cajanus cajan]
CmoCh12G007300	4	0	0.33	0.001	-4.98373	0.00048829	0.000958718	down	acetyl-CoA carboxylase carbosyltransferase beta subunit [Cucumis melo subsp. melo]// AEM76901.1 acetyl-CoA carboxylase carbosyltransferase beta subunit (chloroplast) [Cucumis melo subsp. melo]
CmoCh12G008030	74	18	4.46	1.14	-1.90449	3.49556e-22	1.80746e-21	down	PREDICTED: arogenate dehydratase 3, chloroplastic-like, partial [Cucumis melo]
CmoCh12G008150	86	13	2.97	0.47	-2.58678	2.00015e-36	1.50161e-35	down	PREDICTED: lysosomal Pro-X carboxypeptidase-like [Vigna radiata var. radiata]
CmoCh12G008290	17	6	3.92	1.5	-1.35705	0.000357998	0.000715995	down	-
CmoCh12G008420	24	5	1.23	0.27	-2.10876	5.24218e-09	1.54816e-08	down	PREDICTED: S-adenosylmethionine decarboxylase proenzyme-like [Cucumis melo]
CmoCh12G008890	67	20	10.76	3.43	-1.61034	2.16221e-16	9.16212e-16	down	PREDICTED: auxin-responsive protein IAA33 [Cucumis melo]
CmoCh12G008930	14	5	0.28	0.1	-1.33671	0.00184169	0.00339263	down	PREDICTED: transcription initiation factor TFIID subunit 4b [Cucumis melo]
CmoCh12G009160	25	5	0.61	0.13	-2.16734	1.19201e-09	3.65141e-09	down	ANTH domain-containing protein [Cephalotus follicularis]
CmoCh12G009280	539	232	20.84	9.41	-1.08773	5.37264e-67	6.50857e-66	down	PREDICTED: methyl-CpG-binding domain-containing protein 2-like [Cucumis melo]
CmoCh12G009290	10	0	28.75	0.001	-6.27804	3.72569e-09	1.10838e-08	down	-
CmoCh12G009360	190	44	4.08	0.99	-1.97946	1.69848e-57	1.81084e-56	down	PREDICTED: U-box domain-containing protein 52-like [Cucumis sativus]
CmoCh12G009670	7410.26	2495.44	178.08	62.78	-1.44235	0	0	down	Ankyrin repeat family protein isoform 1 [Theobroma cacao]// EOY10890.1 Ankyrin repeat family protein isoform 1 [Theobroma cacao]
CmoCh12G009700	5	1	1.51	0.33	-2.06827	0.012726	0.0207238	down	PREDICTED: probable protein S-acyltransferase 22 [Cucumis melo]
CmoCh12G009720	23	4	4.51	0.84	-2.36123	6.41757e-10	1.99603e-09	down	-
CmoCh12G009830	862	167	38.04	7.74	-2.23899	1.32745e-297	6.99512e-296	down	PREDICTED: GDSL esterase/lipase At1g29670-like [Cucumis melo]
CmoCh12G009850	7	2	0.23	0.07	-1.62228	0.00935554	0.0155574	down	PREDICTED: ammonium transporter 1 member 2-like [Cucumis melo]
CmoCh12G009900	1278	464	91.05	34.86	-1.33343	2.66889e-229	1.04481e-227	down	PREDICTED: photosystem I reaction center subunit IV, chloroplastic-like [Cucumis melo]
CmoCh12G009920	13	5	0.55	0.22	-1.23082	0.00383851	0.00677226	down	PREDICTED: U-box domain-containing protein 9-like [Cucumis melo]
CmoCh12G010610	47	12	1.85	0.49	-1.8313	8.76274e-14	3.33657e-13	down	PREDICTED: CST complex subunit TEN1 [Cucumis melo]// XP_008453921.1 PREDICTED: CST complex subunit TEN1 [Cucumis melo]
CmoCh12G010630	21.22	6.04	1.51	0.45	-1.65981	2.7325e-06	6.69342e-06	down	PREDICTED: F-box protein PP2-B13-like [Cucumis melo]
CmoCh12G010720	15	6	7.89	3.54	-1.17795	0.0031563	0.00564488	down	PREDICTED: ATP-dependent Clp protease proteolytic subunit-related protein 3, chloroplastic-like, partial [Raphanus sativus]
CmoCh12G010780	105	29	3.63	1.05	-1.72409	3.04108e-27	1.83437e-26	down	PREDICTED: protein SRC2-like [Cucumis melo]
CmoCh12G011130	67	30	1.57	0.74	-1.02823	7.91666e-09	2.31175e-08	down	PREDICTED: coiled-coil domain-containing protein SCD2 isoform X1 [Cucumis melo]// XP_008455544.1 PREDICTED: coiled-coil domain-containing protein SCD2 isoform X1 [Cucumis melo]
CmoCh12G011200	2	0	1.39	0.001	-4.02862	0.0312501	0.0472645	down	-
CmoCh12G011300	4	0	0.23	0.001	-4.98373	0.00048829	0.000958718	down	PREDICTED: protein IQ-DOMAIN 14-like [Malus domestica]
CmoCh12G011400	146	37	6.2	1.65	-1.84897	9.91546e-41	8.04919e-40	down	PREDICTED: light-inducible protein CPRF2-like [Cucumis melo]
CmoCh12G011610	12	1	4.79	0.44	-3.30973	6.67875e-08	1.83717e-07	down	VQ domain-containing protein [Cephalotus follicularis]
CmoCh12G011740	152	59	6.58	2.68	-1.23556	4.39784e-24	2.40915e-23	down	PREDICTED: transcription factor bHLH66-like [Cucumis melo]
CmoCh12G011770	250	101	34.38	14.8	-1.17858	4.32066e-36	3.22092e-35	down	PREDICTED: uncharacterized serine-rich protein C215.13-like [Cucumis melo]
CmoCh12G011850	319	133	15.56	6.82	-1.13338	5.10269e-43	4.32975e-42	down	PREDICTED: RING-H2 finger protein ATL16 [Cucumis melo]
CmoCh12G011990	6.69	0	9.61	0.001	-5.77141	1.90744e-06	4.7317e-06	down	DUF1068 domain-containing protein [Cephalotus follicularis]
CmoCh12G012220	94	33	2.85	1.05	-1.37894	3.44267e-18	1.56284e-17	down	PREDICTED: TBC1 domain family member 15 [Cucumis melo]
CmoCh12G012260	9	2	0.45	0.11	-1.97896	0.00053508	0.0010461	down	PREDICTED: uclacyanin-3-like [Cucumis melo]
CmoCh12G012680	97	43	4.4	2.05	-1.04354	1.42627e-12	5.12355e-12	down	PREDICTED: probable serine incorporator isoform X3 [Cucumis melo]
CmoCh12G013000	2	0	0.26	0.001	-4.02862	0.0312501	0.0472645	down	PREDICTED: SNW/SKI-interacting protein-like [Cucumis melo]
CmoCh12G013180	45	20	2.2	1.03	-1.03747	1.6114e-06	4.02411e-06	down	PREDICTED: inositol oxygenase 2 [Cucumis melo]
CmoCh12G013190	468	93	23.69	4.95	-2.20171	5.60553e-159	1.48976e-157	down	PREDICTED: zinc finger CCCH domain-containing protein 20-like [Cucumis melo]
CmoCh12G013380	7	2	1.45	0.44	-1.62228	0.00935554	0.0155574	down	BnaCnng68970D [Brassica napus]
CmoCh12G013540	446	167	15.6	6.13	-1.28854	3.76519e-72	4.8672e-71	down	PREDICTED: lycopene epsilon cyclase, chloroplastic [Cucumis melo]
CmoCh13G000180	1359	1	31.75	0.02	-10.1176	0	0	down	PREDICTED: cation/H(+) antiporter 15-like [Cucumis melo]
CmoCh13G000210	22	9	31.59	15.33	-1.15098	0.000365855	0.000731179	down	-
CmoCh13G000410	36	14	3.1	1.27	-1.22749	1.49278e-06	3.7375e-06	down	PREDICTED: RING-H2 finger protein ATL63 isoform X4 [Cucumis melo]
CmoCh13G000660	52	20	3.56	1.44	-1.2455	3.8843e-09	1.15481e-08	down	PREDICTED: GDP-mannose transporter GONST2 isoform X2 [Cucumis melo]
CmoCh13G000820	545	187	31.31	11.3	-1.4146	4.93474e-101	8.55354e-100	down	BnaC02g10420D [Brassica napus]
CmoCh13G000830	4	0	1.87	0.001	-4.98373	0.00048829	0.000958718	down	-
CmoCh13G000850	24	3	3.03	0.4	-2.82345	3.16276e-12	1.11323e-11	down	-
CmoCh13G000870	38	16	6.23	2.81	-1.1141	3.83039e-06	9.24877e-06	down	PREDICTED: cytosolic enolase 3-like [Cucumis melo]
CmoCh13G001120	50	22	2.97	1.38	-1.05233	4.69041e-07	1.21637e-06	down	HAD-superfamily hydrolase, subfamily IA, variant 3 [Corchorus olitorius]
CmoCh13G001130	1070	443	48.04	20.89	-1.14398	3.81627e-149	9.59639e-148	down	HAD-superfamily hydrolase, subfamily IA, variant 3 [Corchorus capsularis]
CmoCh13G001240	73	3	2.78	0.12	-4.42307	2.07921e-49	1.9685e-48	down	PREDICTED: glucan endo-1,3-beta-glucosidase [Cucumis sativus]// KGN65723.1 Glucan endo-1,3-beta-glucosidase [Cucumis sativus]
CmoCh13G001460	118	8	4.08	0.29	-3.73481	8.56599e-70	1.07798e-68	down	PREDICTED: phenolic glucoside malonyltransferase 2-like [Cucumis sativus]
CmoCh13G001560	98	41	30.09	13.75	-1.12684	3.84004e-14	1.48327e-13	down	BnaA07g13880D [Brassica napus]
CmoCh13G001840	7	1	3.43	0.55	-2.54317	0.000488299	0.000958718	down	-
CmoCh13G001900	61	27	1.75	0.81	-1.04452	2.83e-08	7.98309e-08	down	PREDICTED: MLO-like protein 3 [Cucumis melo]
CmoCh13G002120	7	0	0.12	0.001	-5.77141	1.90744e-06	4.7317e-06	down	PREDICTED: tetrahydrocannabinolic acid synthase-like [Cucumis melo]
CmoCh13G002260	9.42	0	0.29	0.001	-6.1281	2.98049e-08	8.38956e-08	down	PREDICTED: protein LTV1 homolog [Cucumis melo]
CmoCh13G002320	14	1.74	0.4	0.05	-2.60901	6.24134e-07	1.60473e-06	down	high affinity nitrate transporter 2.4-like [Cucumis sativus]// AAS93686.3 high-affinity nitrate transporter [Cucumis sativus]
CmoCh13G002430	5	1	0.33	0.07	-2.06827	0.012726	0.0207238	down	PREDICTED: probable xyloglucan endotransglucosylase/hydrolase protein 32 [Cucumis melo]
CmoCh13G002920	2	0	0.03	0.001	-4.02862	0.0312501	0.0472645	down	Transposon Ty3-G Gag-Pol polyprotein, partial [Noccaea caerulescens]
CmoCh13G003170	14	5	0.45	0.17	-1.33671	0.00184169	0.00339263	down	PREDICTED: cytochrome P450 94C1 [Cucumis sativus]
CmoCh13G003240	16.74	0	0.17	0.001	-7.0359	3.55381e-15	1.43233e-14	down	Transposon Ty3-I Gag-Pol polyprotein [Noccaea caerulescens]
CmoCh13G003330	5	0	0.17	0.001	-5.29651	6.10368e-05	0.00013234	down	PREDICTED: WEB family protein At1g12150 [Cucumis melo]// XP_008464301.1 PREDICTED: WEB family protein At1g12150 [Cucumis melo]// XP_016903182.1 PREDICTED: WEB family protein At1g12150 [Cucumis melo]
CmoCh13G003380	42	10	4.75	1.2	-1.92969	1.40261e-13	5.28244e-13	down	PREDICTED: mediator of RNA polymerase II transcription subunit 11 [Cucumis melo]// XP_008442052.1 PREDICTED: mediator of RNA polymerase II transcription subunit 11 [Cucumis melo]// XP_016899531.1 PREDICTED: mediator of RNA polymerase II transcription subunit 11 [Cucumis melo]
CmoCh13G003460	2.17	0	0.07	0.001	-4.02862	0.0312501	0.0472645	down	mutant gag-pol polyprotein [Pisum sativum]
CmoCh13G003700	4	0	1.2	0.001	-4.98373	0.00048829	0.000958718	down	PREDICTED: alpha-mannosidase-like [Malus domestica]
CmoCh13G003730	10.89	1.28	0.3	0.04	-3.18561	4.17743e-07	1.08839e-06	down	reverse transcriptase [Corchorus capsularis]
CmoCh13G003770	37.89	8.57	0.74	0.18	-1.93589	2.6487e-12	9.36475e-12	down	reverse transcriptase [Corchorus capsularis]
CmoCh13G003810	2957	1135	241.1	97.75	-1.25331	0	0	down	PREDICTED: photosystem I subunit O [Cucumis melo]
CmoCh13G004130	3	0	3.63	0.001	-4.58381	0.00390629	0.00682066	down	-
CmoCh13G004470	3	0	0.71	0.001	-4.58381	0.00390629	0.00682066	down	-
CmoCh13G004490	1111.13	0	19.31	0.001	-13.0552	0	0	down	PREDICTED: calcium permeable stress-gated cation channel 1-like [Cucumis melo]// XP_008459006.1 PREDICTED: calcium permeable stress-gated cation channel 1-like [Cucumis melo]
CmoCh13G005290	8	1	0.37	0.05	-2.73251	8.79809e-05	0.000187486	down	PREDICTED: WAT1-related protein At3g30340 [Cucumis sativus]
CmoCh13G005610	153	52	6.35	2.26	-1.42683	6.9252e-30	4.46453e-29	down	PREDICTED: piriformospora indica-insensitive protein 2-like [Cucumis melo]
CmoCh13G005720	542	107	26.74	5.55	-2.21138	3.33865e-185	1.05884e-183	down	PREDICTED: probable purine permease 10 [Cucumis melo]
CmoCh13G006150	29	7	3.07	0.79	-1.90465	2.40319e-09	7.22662e-09	down	DUF1685 domain-containing protein [Cephalotus follicularis]
CmoCh13G006260	121	35	11.63	3.56	-1.65818	1.44145e-29	9.23226e-29	down	PREDICTED: transcription factor TGA6-like [Juglans regia]
CmoCh13G006390	3	0	0.67	0.001	-4.58381	0.00390629	0.00682066	down	PREDICTED: transcription factor TCP10-like [Cucumis melo]
CmoCh13G006500	130	45	25.49	9.49	-1.4001	6.52676e-25	3.66573e-24	down	PREDICTED: ethylene-responsive transcription factor 12 [Cucumis melo]
CmoCh13G006560	1019	459	17.26	8.13	-1.02236	1.21941e-117	2.4477e-116	down	PREDICTED: LOW QUALITY PROTEIN: protein SMG7L [Cucumis melo]
CmoCh13G006580	846	327	66.66	27.2	-1.24302	7.72679e-136	1.76869e-134	down	PREDICTED: pistil-specific extensin-like protein [Cucumis sativus]// KGN64686.1 Structural constituent of cell wall [Cucumis sativus]
CmoCh13G006600	560	16	25.68	0.77	-4.99085	0	0	down	DUF506 domain-containing protein [Cephalotus follicularis]
CmoCh13G006810	50	4	1.82	0.15	-3.47712	1.27315e-28	7.95649e-28	down	PREDICTED: serine carboxypeptidase-like 31 [Cucumis melo]
CmoCh13G006840	5.66	1.35	9.8	2.8	-2.32517	0.00257689	0.00466403	down	hypothetical protein Csa_1G073010 [Cucumis sativus]
CmoCh13G006860	52	23	4.22	1.97	-1.04498	2.76702e-07	7.29404e-07	down	PREDICTED: pinin-like [Prunus mume]
CmoCh13G006940	166	62	7.64	3	-1.29116	3.68706e-28	2.27429e-27	down	cotton fiber expressed protein [Gossypium barbadense]
CmoCh13G006990	361	142	11.42	4.71	-1.21737	5.93669e-54	5.99104e-53	down	armadillo/beta-catenin repeat family protein [Populus trichocarpa]// EEE86161.1 armadillo/beta-catenin repeat family protein [Populus trichocarpa]
CmoCh13G007140	8	2	0.13	0.03	-1.81162	0.00231579	0.00421803	down	PREDICTED: receptor-like serine/threonine-protein kinase SD1-8 [Cucumis melo]
CmoCh13G007250	1291	468.91	57.41	21.9	-1.33257	2.30416e-231	9.09779e-230	down	PREDICTED: oxygen-evolving enhancer protein 3-2, chloroplastic [Cucumis melo]
CmoCh13G007290	163	25	3.99	0.64	-2.57111	1.48199e-67	1.81044e-66	down	PREDICTED: cysteine-rich receptor-like protein kinase 28 [Cucumis melo]
CmoCh13G007330	204.22	0	7.11	0.001	-10.6107	5.66599e-172	1.65945e-170	down	DUF177 domain protein [Medicago truncatula]// AET04272.1 DUF177 domain protein [Medicago truncatula]
CmoCh13G007420	133	23	6.11	1.11	-2.39762	2.91255e-51	2.82839e-50	down	PREDICTED: gibberellin 2-beta-dioxygenase 8 isoform X2 [Cucumis melo]
CmoCh13G007500	63	11	1.4	0.26	-2.37721	1.13903e-24	6.3559e-24	down	PREDICTED: homeobox-leucine zipper protein PROTODERMAL FACTOR 2 [Cucumis melo]
CmoCh13G007660	4475	888	183.49	38.22	-2.20506	0	0	down	PREDICTED: peroxidase 42 [Cucumis melo]// ADN34050.1 peroxidase [Cucumis melo subsp. melo]
CmoCh13G007680	3.93	0	0.08	0.001	-4.98373	0.00048829	0.000958718	down	Reverse transcriptase, RNA-dependent DNA polymerase [Corchorus capsularis]
CmoCh13G007730	788	172	160.56	37.71	-2.06698	2.89312e-246	1.23428e-244	down	PREDICTED: zinc-regulated protein 8 [Ziziphus jujuba]// XP_015884363.1 PREDICTED: zinc-regulated protein 8 [Ziziphus jujuba]
CmoCh13G008210	92	40	7.35	3.37	-1.07134	2.00404e-12	7.13215e-12	down	BnaAnng12320D [Brassica napus]
CmoCh13G008220	988	418	21.34	9.45	-1.11275	1.26645e-131	2.80799e-130	down	malate synthase [Cucurbita maxima]
CmoCh13G008250	97	20	2.92	0.63	-2.14329	3.92563e-33	2.73553e-32	down	4-coumarate-CoA ligase [Cucumis melo subsp. melo]
CmoCh13G008390	10.29	2.42	0.7	0.17	-2.1289	0.00011685	0.000246169	down	PREDICTED: protein IRX15-LIKE [Cucumis melo]
CmoCh13G008420	8	1	3.96	0.55	-2.73251	8.79809e-05	0.000187486	down	BnaA06g32460D [Brassica napus]
CmoCh13G008460	4220	1367	177.23	60.27	-1.49811	0	0	down	PREDICTED: squamosa promoter-binding-like protein 13A [Cucumis melo]
CmoCh13G008640	2	0	0.11	0.001	-4.02862	0.0312501	0.0472645	down	BnaA08g30410D [Brassica napus]
CmoCh13G008650	25	3	0.31	0.04	-2.88203	1.02297e-12	3.69744e-12	down	PREDICTED: LRR receptor-like serine/threonine-protein kinase GSO1 [Cucumis melo]
CmoCh13G008840	400	180	26.75	12.69	-1.02348	1.9276e-45	1.70709e-44	down	Polyadenylate-binding protein 1-B-binding protein [Theobroma cacao]
CmoCh13G008850	110	3	7.83	0.23	-5.01373	1.41895e-78	1.98812e-77	down	PREDICTED: caffeoylshikimate esterase-like [Cucumis melo]
CmoCh13G008960	6	0	0.32	0.001	-5.55341	1.52593e-05	3.49815e-05	down	PREDICTED: transcription factor MYB86-like [Cucumis melo]
CmoCh13G008990	2	0	0.17	0.001	-4.02862	0.0312501	0.0472645	down	PREDICTED: oleosin 5-like [Cucumis melo]
CmoCh13G009190	258	34	7.08	0.98	-2.79139	3.9132e-116	7.71995e-115	down	PREDICTED: probable inactive poly [ADP-ribose] polymerase SRO5 isoform X1 [Cucumis melo]
CmoCh13G009220	901	391	17.5	7.95	-1.07609	1.23191e-113	2.37423e-112	down	PREDICTED: E3 ubiquitin-protein ligase SIS3-like isoform X1 [Cucumis melo]
CmoCh13G009290	261	91	24.72	9.12	-1.3909	3.78268e-48	3.50658e-47	down	PREDICTED: rhoGEF domain-containing protein gxcJ-like [Arachis ipaensis]
CmoCh13G009410	3587	1494	41.74	18.16	-1.13549	0	0	down	PREDICTED: probable myosin-binding protein 5 [Cucumis melo]
CmoCh13G009420	19	1	7.05	0.41	-3.96697	1.69854e-12	6.0684e-12	down	PREDICTED: probable myosin-binding protein 5 [Cucumis melo]
CmoCh13G009540	6	0	0.19	0.001	-5.55341	1.52593e-05	3.49815e-05	down	PREDICTED: protein NRT1/ PTR FAMILY 2.8 [Cucumis melo]
CmoCh13G009550	74	9	3.98	0.51	-2.89501	1.15454e-35	8.51465e-35	down	PREDICTED: transmembrane protein DDB_G0273707/DDB_G0273361-like [Nicotiana tomentosiformis]
CmoCh13G009680	2	0	0.2	0.001	-4.02862	0.0312501	0.0472645	down	plant/F12B17-70 protein [Medicago truncatula]// KEH42859.1 plant/F12B17-70 protein [Medicago truncatula]
CmoCh13G009720	1.99	0	0.12	0.001	-4.02862	0.0312501	0.0472645	down	PREDICTED: probable 2-oxoglutarate-dependent dioxygenase AOP1 [Cucumis sativus]
CmoCh13G009730	5.01	0	0.31	0.001	-5.29651	6.10368e-05	0.00013234	down	PREDICTED: probable 2-oxoglutarate-dependent dioxygenase AOP1 [Cucumis sativus]
CmoCh13G009880	21	7	11.05	4.13	-1.44145	2.18109e-05	4.93278e-05	down	PREDICTED: probable pectinesterase/pectinesterase inhibitor 39 [Cucumis sativus]
CmoCh13G010060	152	53	6.8	2.49	-1.38996	1.27092e-28	7.94435e-28	down	PREDICTED: protein SHOOT GRAVITROPISM 5-like [Cucumis melo]
CmoCh13G010250	4	0	0.38	0.001	-4.98373	0.00048829	0.000958718	down	PREDICTED: probable ADP-ribosylation factor GTPase-activating protein AGD11 isoform X1 [Cucumis sativus]
CmoCh13G010570	15	5	0.67	0.24	-1.43536	0.00058442	0.00113836	down	Core-2/I-branching beta-1,6-N-acetylglucosaminyltransferase family protein [Theobroma cacao]
CmoCh13G010830	17	3	3.38	0.64	-2.32916	2.70681e-07	7.14146e-07	down	transmembrane protein [Arabidopsis thaliana]// AAF69704.1 F27J15.21 [Arabidopsis thaliana]// AAS65939.1 At1g49000 [Arabidopsis thaliana]// AAS88782.1 At1g49000 [Arabidopsis thaliana]// AEE32379.1 transmembrane protein [Arabidopsis thaliana]
CmoCh13G011020	10	3	1.04	0.33	-1.5713	0.00337801	0.00601043	down	PREDICTED: universal stress protein PHOS32-like [Malus domestica]// XP_008346787.1 PREDICTED: universal stress protein PHOS32-like [Malus domestica]
CmoCh13G011370	339	127	10.93	4.29	-1.28761	2.51652e-55	2.60148e-54	down	PREDICTED: myosin-7 [Cucumis melo]
CmoCh13G011450	3	0	6.86	0.001	-4.58381	0.00390629	0.00682066	down	-
CmoCh13G011670	364	80	14.61	3.37	-2.05619	6.47795e-114	1.25198e-112	down	PREDICTED: BTB/POZ and TAZ domain-containing protein 1-like [Cucumis melo]
CmoCh13G011710	9	0	28.05	0.001	-6.1281	2.98049e-08	8.38956e-08	down	PREDICTED: transcription factor PRE5-like [Cucumis sativus]// KGN63980.1 DNA binding protein [Cucumis sativus]
CmoCh13G012000	892.44	382.81	28.43	12.78	-1.09142	3.171e-115	6.20248e-114	down	PREDICTED: ribulose-phosphate 3-epimerase, chloroplastic [Cucumis melo]
CmoCh13G012080	841	193	20.12	4.83	-1.99479	7.90259e-251	3.45707e-249	down	PREDICTED: protein SHOOT GRAVITROPISM 5-like [Cucumis melo]
CmoCh14G000020	18	6	6.39	2.34	-1.43891	0.000112285	0.000236968	down	-
CmoCh14G000030	87	3	6.88	0.25	-4.67577	1.19937e-60	1.33933e-59	down	PREDICTED: protein LURP-one-related 8 [Cucumis melo]
CmoCh14G000120	63330	15811	4859.24	1280.5	-1.87391	0	0	down	PREDICTED: non-specific lipid-transfer protein 1-like [Cucumis melo]
CmoCh14G000130	333	144	11.67	5.29	-1.08078	1.53837e-41	1.26749e-40	down	PREDICTED: pentatricopeptide repeat-containing protein At5g15300-like [Cucumis sativus]
CmoCh14G000260	220	78	29.99	11.33	-1.36656	9.53127e-40	7.59416e-39	down	PREDICTED: formin-F-like [Nicotiana tomentosiformis]// XP_016492401.1 PREDICTED: formin-F-like [Nicotiana tabacum]
CmoCh14G000450	3	0	0.07	0.001	-4.58381	0.00390629	0.00682066	down	pyruvate decarboxylase 1 [Cucumis melo]// AIC36754.1 pyruvate/alpha-keto acid decarboxylase [Cucumis melo]
CmoCh14G000870	438	44	11.33	1.19	-3.18383	1.42104e-222	5.42436e-221	down	GDP-fucose protein O-fucosyltransferase [Corchorus olitorius]
CmoCh14G001020	469	14	12.16	0.38	-4.92619	0	0	down	PREDICTED: protein NRT1/ PTR FAMILY 5.6 [Cucumis melo]
CmoCh14G001030	33	5	1.15	0.18	-2.56606	4.38137e-15	1.75821e-14	down	PREDICTED: LOW QUALITY PROTEIN: WSC domain-containing protein ARB_07867 [Cucumis melo]
CmoCh14G001050	379	88	10.5	2.55	-1.97712	8.48013e-113	1.62413e-111	down	PREDICTED: protein RETICULATA, chloroplastic-like [Cucumis melo]
CmoCh14G001290	125	10	3.67	0.31	-3.50019	1.25223e-70	1.59079e-69	down	PREDICTED: laccase-17-like [Cucumis melo]
CmoCh14G001320	119	52	3.16	1.45	-1.06461	2.11526e-15	8.60338e-15	down	PREDICTED: laccase-17-like [Cucumis melo]
CmoCh14G001570	2	0	0.38	0.001	-4.02862	0.0312501	0.0472645	down	PREDICTED: uncharacterized protein LOC105434955 [Cucumis sativus]
CmoCh14G001600	196.35	67.66	3.78	1.36	-1.39763	1.05319e-36	7.95666e-36	down	retrovirus-related Pol polyprotein from transposon TNT 1-94 [Dorcoceras hygrometricum]
CmoCh14G001690	807.08	364	6.61	3.12	-1.02035	2.97835e-93	4.81992e-92	down	PREDICTED: WRKY transcription factor 44 isoform X1 [Cucumis melo]// XP_016899726.1 PREDICTED: WRKY transcription factor 44 isoform X1 [Cucumis melo]
CmoCh14G001860	105	33	3.49	1.15	-1.53839	3.04169e-23	1.62743e-22	down	PREDICTED: probable beta-1,4-xylosyltransferase IRX9 isoform X2 [Cucumis sativus]
CmoCh14G001900	319	124	18.69	7.65	-1.23438	5.79085e-49	5.44138e-48	down	PREDICTED: chromo domain-containing protein cec-1 [Fragaria vesca subsp. vesca]
CmoCh14G001930	64	3	3.1	0.15	-4.2336	3.47161e-42	2.89757e-41	down	PREDICTED: peroxidase 21-like [Cucumis melo]
CmoCh14G002020	60	14	10.82	2.71	-1.96237	4.31151e-19	2.01947e-18	down	Senescence regulator [Corchorus olitorius]
CmoCh14G002160	201	77	5.43	2.18	-1.25492	2.94256e-32	2.01233e-31	down	PREDICTED: 4-coumarate--CoA ligase-like 7 [Cucumis melo]
CmoCh14G002220	30.03	0	1.19	0.001	-7.85055	1.29374e-26	7.64317e-26	down	PREDICTED: heparan-alpha-glucosaminide N-acetyltransferase-like [Cucumis melo]
CmoCh14G002250	22550	7106	994.26	329.03	-1.53796	0	0	down	PREDICTED: aquaporin TIP1-1-like [Cucumis melo]
CmoCh14G002290	25	0	2.28	0.001	-7.58877	2.11904e-22	1.10315e-21	down	PREDICTED: splicing factor 3A subunit 2-like [Ziziphus jujuba]// XP_015869732.1 PREDICTED: splicing factor 3A subunit 2-like isoform X1 [Ziziphus jujuba]// XP_015869733.1 PREDICTED: splicing factor 3A subunit 2-like isoform X2 [Ziziphus jujuba]// XP_015870065.1 PREDICTED: splicing factor 3A subunit 2-like [Ziziphus jujuba]// XP_015870162.1 PREDICTED: splicing factor 3A subunit 2-like [Ziziphus ju…
CmoCh14G002420	52	0	4.64	0.001	-8.64146	5.37567e-44	4.64431e-43	down	PREDICTED: pistil-specific extensin-like protein [Cucumis melo]
CmoCh14G002480	232	53	8.62	2.07	-1.99958	7.00687e-71	8.93198e-70	down	PREDICTED: F-box protein PP2-A15 isoform X2 [Cucumis melo]
CmoCh14G002490	23	4	3.4	0.63	-2.36123	6.41757e-10	1.99603e-09	down	-
CmoCh14G002500	323	126	13.43	5.5	-1.22928	3.63206e-49	3.42221e-48	down	PREDICTED: ESF1 homolog [Cucumis melo]
CmoCh14G002530	3	0	0.11	0.001	-4.58381	0.00390629	0.00682066	down	PREDICTED: LOW QUALITY PROTEIN: cytochrome P450 76A2 [Cucumis melo]
CmoCh14G002570	20	7	5.23	1.99	-1.37151	7.01176e-05	0.000151055	down	BnaAnng16530D [Brassica napus]
CmoCh14G002620	2	0	5.6	0.001	-4.02862	0.0312501	0.0472645	down	-
CmoCh14G002780	772	303	25.94	10.67	-1.22092	1.69779e-120	3.49447e-119	down	PREDICTED: zinc-regulated protein 8-like [Gossypium hirsutum]
CmoCh14G002960	194	74	7.96	3.19	-1.26106	2.087e-31	1.39504e-30	down	bZIP1 [Citrullus lanatus]
CmoCh14G003070	52	10	2.26	0.46	-2.23696	1.10156e-19	5.26608e-19	down	PREDICTED: alpha carbonic anhydrase 1, chloroplastic [Cucumis melo]
CmoCh14G003090	370	48	28.81	3.95	-2.8153	1.24948e-166	3.48538e-165	down	BnaC08g23910D [Brassica napus]
CmoCh14G003240	6	1	6.52	1.27	-2.32517	0.00257689	0.00466403	down	hypothetical protein Csa_3G778180 [Cucumis sativus]
CmoCh14G003280	236	105	6.59	3.07	-1.03951	3.58201e-28	2.21098e-27	down	Momilactone A synthase [Glycine soja]
CmoCh14G003310	26	6	1.39	0.34	-1.96622	4.82011e-09	1.4258e-08	down	PREDICTED: tropinone reductase-like 1 [Cucumis melo]
CmoCh14G003330	75	15	34.07	7.58	-2.18495	2.11218e-26	1.24092e-25	down	BnaAnng01660D [Brassica napus]
CmoCh14G003360	58	19	10.83	3.81	-1.47621	9.49392e-13	3.43692e-12	down	PREDICTED: transcription repressor OFP6-like [Cucumis melo]
CmoCh14G003500	3	0	0.22	0.001	-4.58381	0.00390629	0.00682066	down	PREDICTED: protein YLS9 [Ziziphus jujuba]// XP_015900400.1 PREDICTED: protein YLS9-like [Ziziphus jujuba]
CmoCh14G003660	3	0	0.57	0.001	-4.58381	0.00390629	0.00682066	down	PREDICTED: calcium-transporting ATPase 4, plasma membrane-type [Cicer arietinum]
CmoCh14G003960	204	91	12.77	6	-1.03562	2.18728e-24	1.20974e-23	down	PREDICTED: F-box/kelch-repeat protein At2g44130-like [Cucumis melo]
CmoCh14G004120	296	128	13.78	6.26	-1.0807	4.11538e-37	3.13661e-36	down	PREDICTED: homeobox-leucine zipper protein HOX11 isoform X1 [Juglans regia]
CmoCh14G004400	178	62	8.81	3.23	-1.39178	3.14107e-33	2.19437e-32	down	PREDICTED: transcription factor bHLH130 [Cucumis melo]
CmoCh14G004410	2	0	0.48	0.001	-4.02862	0.0312501	0.0472645	down	indole-3-pyruvate monooxygenase YUCCA6 [Cucumis melo]// AJO67752.1 YUCCA type protein 6 [Cucumis melo]
CmoCh14G004470	291	18	12.4	0.81	-3.87801	2.56852e-175	7.62806e-174	down	PREDICTED: zinc finger protein WIP2-like [Cucumis melo]
CmoCh14G004660	10	3	16.25	5.82	-1.5713	0.00337801	0.00601043	down	PREDICTED: B3 domain-containing transcription factor VRN1-like [Daucus carota subsp. sativus]
CmoCh14G005030	57	4	2.09	0.15	-3.66569	6.74394e-34	4.79152e-33	down	PREDICTED: WAT1-related protein At5g07050-like [Cucumis melo]// ADN33889.1 nodulin-like protein [Cucumis melo subsp. melo]
CmoCh14G005150	2	0	0.06	0.001	-4.02862	0.0312501	0.0472645	down	PREDICTED: vacuolar amino acid transporter 1-like [Cucumis sativus]
CmoCh14G005350	117	46	26.86	11.41	-1.21663	1.37757e-18	6.33292e-18	down	hypothetical protein Csa_3G822320 [Cucumis sativus]
CmoCh14G005360	374	157	15.23	6.71	-1.12364	2.46413e-49	2.32972e-48	down	PREDICTED: 15-cis-phytoene desaturase, chloroplastic/chromoplastic [Cucumis melo]
CmoCh14G005820	12	0	0.93	0.001	-6.53797	5.82167e-11	1.92658e-10	down	DUF1997 domain-containing protein [Cephalotus follicularis]
CmoCh14G005840	514	38	28.21	2.19	-3.62549	4.25054e-293	2.18554e-291	down	PREDICTED: NAC domain-containing protein 100-like [Cucumis melo]
CmoCh14G005960	212	41	10.6	2.16	-2.23902	1.24282e-74	1.6523e-73	down	Nod26-like protein [Cucurbita pepo]
CmoCh14G006080	737	329	31.2	14.62	-1.03527	1.96845e-87	3.03245e-86	down	PREDICTED: aldose 1-epimerase [Cucumis melo]
CmoCh14G006190	348	156	15.13	7.12	-1.02894	4.59389e-40	3.68689e-39	down	DUF569 domain-containing protein [Cephalotus follicularis]
CmoCh14G006280	10	2	0.89	0.19	-2.1289	0.00011685	0.000246169	down	PREDICTED: coiled-coil domain-containing protein 136 isoform X2 [Vitis vinifera]
CmoCh14G006350	38	10	1.07	0.29	-1.78577	3.23326e-11	1.08365e-10	down	PREDICTED: protein NRT1/ PTR FAMILY 5.8-like [Cucumis melo]
CmoCh14G006560	2	0	0.14	0.001	-4.02862	0.0312501	0.0472645	down	PREDICTED: bidirectional sugar transporter SWEET5-like [Cucumis melo]
CmoCh14G006620	6169.84	2014.82	271.78	93.2	-1.48639	0	0	down	PREDICTED: formate dehydrogenase, mitochondrial [Cucumis melo]
CmoCh14G006650	32	6	1.11	0.22	-2.26443	1.93279e-12	6.88035e-12	down	PREDICTED: carbonic anhydrase 2-like isoform X1 [Cucumis melo]
CmoCh14G006750	2	0	0.08	0.001	-4.02862	0.0312501	0.0472645	down	PREDICTED: polygalacturonase At1g48100 [Cucumis melo]
CmoCh14G007000	84.21	32	4.81	1.92	-1.26114	2.08594e-14	8.17296e-14	down	Methyltransf_11 domain-containing protein [Cephalotus follicularis]
CmoCh14G007170	155.18	69.54	4.53	2.12	-1.01755	2.27325e-18	1.03847e-17	down	PREDICTED: lysine histidine transporter 2-like [Cucumis melo]
CmoCh14G007200	2	0	1.71	0.001	-4.02862	0.0312501	0.0472645	down	-
CmoCh14G007280	99	44	4.73	2.21	-1.03987	1.30018e-12	4.67794e-12	down	PREDICTED: F-box/kelch-repeat protein At3g27150 [Cucumis melo]// XP_008450092.1 PREDICTED: F-box/kelch-repeat protein At3g27150 [Cucumis melo]
CmoCh14G007870	13396	4163	647.3	211.39	-1.55804	0	0	down	PREDICTED: chalcone synthase 2 [Cucumis melo]
CmoCh14G008120	344	18	8.35	0.46	-4.1193	2.58594e-216	9.63089e-215	down	-
CmoCh14G008240	2	0	0.07	0.001	-4.02862	0.0312501	0.0472645	down	PREDICTED: cytokinin hydroxylase-like [Cucumis melo]
CmoCh14G008290	5.46	1	1.03	0.2	-2.06827	0.012726	0.0207238	down	PREDICTED: agamous-like MADS-box protein AGL80 [Juglans regia]
CmoCh14G008520	51	15	3.89	1.21	-1.62974	7.09144e-13	2.58348e-12	down	PREDICTED: protein C2-DOMAIN ABA-RELATED 4-like [Cucumis melo]
CmoCh14G008580	107	13	16.13	2.09	-2.90155	5.25468e-51	5.08494e-50	down	PREDICTED: major latex protein 149-like [Cucumis melo]
CmoCh14G008910	2	0	0.08	0.001	-4.02862	0.0312501	0.0472645	down	PREDICTED: probable indole-3-pyruvate monooxygenase YUCCA10 [Cucumis melo]
CmoCh14G009100	2180	868	49.93	20.81	-1.20041	0	0	down	PREDICTED: acylsugar acyltransferase 3-like [Cucumis melo]
CmoCh14G009110	866	292	36.01	12.75	-1.43998	6.16435e-177	1.84462e-175	down	PREDICTED: acylsugar acyltransferase 3-like [Cucumis melo]
CmoCh14G009160	155.68	7.94	3.15	0.17	-4.13718	6.47669e-100	1.11144e-98	down	PREDICTED: potassium transporter 5-like [Cucumis sativus]
CmoCh14G009180	40.03	10	0.83	0.22	-1.85953	2.19931e-12	7.81196e-12	down	PREDICTED: potassium transporter 5-like [Cucumis sativus]
CmoCh14G009190	25.28	6	1.35	0.34	-1.90992	1.96785e-08	5.61271e-08	down	PREDICTED: potassium transporter 5-like [Cucumis sativus]
CmoCh14G009200	3305	1492	135.52	64.22	-1.0193	0	0	down	F12P19.7 isoform 1 [Theobroma cacao]
CmoCh14G009390	246	86	14.2	5.22	-1.38697	2.35463e-45	2.08125e-44	down	PREDICTED: bifunctional epoxide hydrolase 2-like [Cucumis melo]
CmoCh14G009530	107	43	5.64	2.38	-1.18492	2.406e-16	1.01748e-15	down	PREDICTED: universal stress protein A-like protein [Cucumis melo]
CmoCh14G009620	209	82	9.8	4.04	-1.22057	4.57621e-32	3.11101e-31	down	PREDICTED: probable WRKY transcription factor 68 isoform X1 [Cucumis sativus]// XP_011651539.1 PREDICTED: probable WRKY transcription factor 68 isoform X1 [Cucumis sativus]
CmoCh14G009630	89	39	6.13	2.83	-1.05999	8.40613e-12	2.8999e-11	down	PREDICTED: flowering time control protein FCA [Cucumis melo]
CmoCh14G009640	165	67	10.02	4.28	-1.17076	5.18156e-24	2.83397e-23	down	PREDICTED: flowering time control protein FCA [Cucumis melo]
CmoCh14G009670	790	270	19.96	7.14	-1.42045	9.20627e-147	2.27965e-145	down	PREDICTED: long chain acyl-CoA synthetase 1 [Cucumis melo]// XP_016900386.1 PREDICTED: long chain acyl-CoA synthetase 1 [Cucumis melo]
CmoCh14G010200	22	8	1.21	0.46	-1.31854	4.32238e-05	9.52694e-05	down	BnaC01g39500D [Brassica napus]
CmoCh14G010230	3	0	10.16	0.001	-4.58381	0.00390629	0.00682066	down	PREDICTED: probable sugar phosphate/phosphate translocator At1g12500 [Cucumis melo]
CmoCh14G010260	155	65	4.84	2.13	-1.12428	1.51293e-21	7.69734e-21	down	gag/pol polyprotein - maize retrotransposon Hopscotch// AAA57005.1 copia-like retrotransposon Hopscotch polyprotein [Zea mays]
CmoCh14G010340	156	43	4.84	1.4	-1.7283	1.01623e-39	8.08756e-39	down	PREDICTED: cytochrome P450 705A5-like [Juglans regia]
CmoCh14G010350	43	2	1.4	0.07	-4.2189	4.58977e-29	2.90591e-28	down	PREDICTED: cytochrome P450 705A5-like [Cucumis sativus]
CmoCh14G010500	34	9	15.03	4.42	-1.776	5.96992e-10	1.86142e-09	down	-
CmoCh14G010650	355	162	25.33	12.19	-1.00325	3.33477e-39	2.62664e-38	down	PREDICTED: chaperone protein dnaJ 8, chloroplastic [Cucumis melo]
CmoCh14G010960	11	3	1.92	0.56	-1.70712	0.000940733	0.0017873	down	NADH-plastoquinone oxidoreductase subunit K (chloroplast) [Gynostemma pentaphyllum]// AMF84016.1 NADH-plastoquinone oxidoreductase subunit K (chloroplast) [Gynostemma pentaphyllum]// ANI25189.1 NADH dehydrogenase subunit K (chloroplast) [Gynostemma pentaphyllum]
CmoCh14G011680	2	0	2.71	0.001	-4.02862	0.0312501	0.0472645	down	-
CmoCh14G011950	5	0	6.39	0.001	-5.29651	6.10368e-05	0.00013234	down	Non-specific lipid-transfer protein 2 [Glycine soja]
CmoCh14G011960	27.97	9.05	0.73	0.25	-1.49708	7.29615e-07	1.86914e-06	down	reverse transcriptase [Corchorus capsularis]
CmoCh14G011970	728	140	622.61	137.97	-2.2495	6.98743e-253	3.07626e-251	down	PREDICTED: non-specific lipid-transfer protein 2P-like [Cucumis melo]
CmoCh14G012280	58.94	11.08	2.99	0.59	-2.28278	3.08811e-22	1.59798e-21	down	PREDICTED: peroxisomal (S)-2-hydroxy-acid oxidase GLO4-like [Cucumis melo]
CmoCh14G012290	7	2	0.41	0.12	-1.62228	0.00935554	0.0155574	down	Retrovirus-related Pol polyprotein from transposon TNT 1-94 [Cajanus cajan]
CmoCh14G012340	128	13	63.37	7.19	-3.15979	1.50359e-65	1.78539e-64	down	PREDICTED: auxin-responsive protein SAUR71-like [Cucumis melo]
CmoCh14G012350	26	0	5.67	0.001	-7.64506	5.2978e-23	2.81596e-22	down	HSP19 [Citrullus lanatus]
CmoCh14G012420	378	161	9.89	4.41	-1.10271	1.87375e-48	1.74461e-47	down	PREDICTED: GDSL esterase/lipase 5 [Cucumis melo]
CmoCh14G012490	881	325	24.16	9.33	-1.31034	3.12734e-154	8.13108e-153	down	PREDICTED: pectinesterase-like [Cucumis melo]
CmoCh14G012670	63	4	2.82	0.19	-3.80977	1.02481e-38	7.99879e-38	down	PREDICTED: transcription factor MYB114-like [Cucumis melo]// XP_004151013.2 PREDICTED: transcription factor MYB114-like isoform X2 [Cucumis sativus]
CmoCh14G012700	473	153	27.01	9.19	-1.49954	9.1327e-96	1.51808e-94	down	PREDICTED: protein BIG GRAIN 1-like B [Cucumis melo]
CmoCh14G012780	32	3	6.44	0.65	-3.23654	5.20326e-18	2.34585e-17	down	PREDICTED: receptor-interacting serine/threonine-protein kinase 4-like [Cucumis melo]
CmoCh14G012790	97	34	3.42	1.26	-1.38129	1.04472e-18	4.82448e-18	down	PREDICTED: ankyrin repeat-containing protein At3g12360 [Cucumis sativus]
CmoCh14G013280	465	87	4.9	0.96	-2.28853	9.05796e-166	2.51651e-164	down	PREDICTED: ABC transporter G family member 29-like [Cucumis melo]
CmoCh14G013750	335.23	64.29	25.43	5.15	-2.25785	6.20104e-118	1.24654e-116	down	PREDICTED: protein LURP-one-related 5 [Cucumis melo]
CmoCh14G013900	63	13	6.13	1.34	-2.13859	5.79601e-22	2.98623e-21	down	PREDICTED: palmitoyl-monogalactosyldiacylglycerol delta-7 desaturase, chloroplastic-like [Cucumis melo]
CmoCh14G013990	2	0	0.27	0.001	-4.02862	0.0312501	0.0472645	down	Vitamin K-dependent S [Gossypium arboreum]
CmoCh14G014290	117	27	3.34	0.81	-1.98268	3.36064e-36	2.51137e-35	down	PREDICTED: probable beta-1,4-xylosyltransferase IRX10 [Cucumis melo]
CmoCh14G014480	26	0	2.92	0.001	-7.64506	5.2978e-23	2.81596e-22	down	PREDICTED: protein TIFY 9-like [Cucumis melo]
CmoCh14G014810	449	153	44.51	16.06	-1.42444	1.28728e-84	1.91254e-83	down	PREDICTED: NAC transcription factor 25 [Cucumis sativus]// KGN53030.1 NAC domain-containing protein [Cucumis sativus]
CmoCh14G015120	1344	603	25.67	12.05	-1.02812	5.39941e-156	1.41452e-154	down	PREDICTED: LOW QUALITY PROTEIN: serine/threonine-protein kinase-like protein ACR4 [Cucumis melo]
CmoCh14G015250	12	2	25.52	5.14	-2.38884	1.50987e-05	3.47317e-05	down	hypothetical protein Csa_4G016420 [Cucumis sativus]
CmoCh14G015330	94	35	1.74	0.68	-1.29435	1.03733e-16	4.45587e-16	down	PREDICTED: clathrin interactor EPSIN 2 isoform X2 [Cucumis melo]
CmoCh14G015430	23	8	0.88	0.32	-1.3823	3.67082e-05	8.14227e-05	down	PREDICTED: UDP-glycosyltransferase 92A1-like [Cucumis melo]
CmoCh14G015680	5.28	1	1.2	0.25	-2.06827	0.012726	0.0207238	down	Csf-2 protein [Cucumis sativus]
CmoCh14G016090	13	5	0.8	0.32	-1.23082	0.00383851	0.00677226	down	PREDICTED: transcription factor MYB108 [Cucumis melo]
CmoCh14G016150	215	83	26.96	11.07	-1.24391	6.81942e-34	4.8439e-33	down	PREDICTED: transcription factor bHLH147-like [Cucumis melo]// XP_008438967.1 PREDICTED: transcription factor bHLH147-like [Cucumis melo]
CmoCh14G016210	13	0	0.95	0.001	-6.65225	7.2773e-12	2.5171e-11	down	PREDICTED: LOW QUALITY PROTEIN: probable N-acetyltransferase HLS1 [Cucumis melo]
CmoCh14G016600	14	6	1.07	0.48	-1.0793	0.00864201	0.0144497	down	heavy-metal-associated domain protein [Medicago truncatula]// AES91863.2 heavy-metal-associated domain protein [Medicago truncatula]
CmoCh14G017040	161	66	3.15	1.35	-1.15704	4.33083e-23	2.30777e-22	down	PREDICTED: pyruvate, phosphate dikinase, chloroplastic isoform X1 [Cucumis melo]
CmoCh14G017070	2	0	2.56	0.001	-4.02862	0.0312501	0.0472645	down	-
CmoCh14G017240	13	4	1.29	0.42	-1.54436	0.000621094	0.0012057	down	PREDICTED: probable aquaporin NIP7-1 [Cucumis sativus]
CmoCh14G017250	1109	442	53.98	22.61	-1.19888	4.33421e-167	1.21764e-165	down	aluminum-induced protein [Cucumis hystrix]
CmoCh14G017390	29	13	0.84	0.39	-1.02278	0.00015017	0.000312567	down	PREDICTED: sugar transport protein 13-like [Cucumis melo]
CmoCh14G017410	3149	1425	404.57	194.8	-1.01583	0	0	down	PREDICTED: photosystem I reaction center subunit II, chloroplastic [Cucumis melo]
CmoCh14G017840	334	34	24.54	2.64	-3.1637	3.14762e-169	9.0363e-168	down	PREDICTED: early light-induced protein 1, chloroplastic [Cucumis melo]
CmoCh14G017900	6	0	3.37	0.001	-5.55341	1.52593e-05	3.49815e-05	down	PREDICTED: uncharacterized protein LOC101218031 [Cucumis sativus]// KGN56937.1 hypothetical protein Csa_3G145740 [Cucumis sativus]
CmoCh14G018060	5	1	0.22	0.05	-2.06827	0.012726	0.0207238	down	PREDICTED: LOW QUALITY PROTEIN: CBL-interacting serine/threonine-protein kinase 7-like [Cucumis melo]
CmoCh14G018120	4	0	0.2	0.001	-4.98373	0.00048829	0.000958718	down	PREDICTED: E3 ubiquitin protein ligase DRIP2-like [Cucumis sativus]
CmoCh14G018220	2	0	0.5	0.001	-4.02862	0.0312501	0.0472645	down	PREDICTED: inhibitor of trypsin and hageman factor-like [Cucumis melo]
CmoCh14G018260	75	10	2.61	0.37	-2.76423	2.23777e-34	1.60356e-33	down	PREDICTED: serine/threonine-protein kinase BLUS1 [Cucumis melo]
CmoCh14G018270	12	0	2.54	0.001	-6.53797	5.82167e-11	1.92658e-10	down	PREDICTED: transcriptional regulator SUPERMAN-like [Cucumis melo]
CmoCh14G018290	19	7	3.55	1.4	-1.298	0.000216835	0.000442894	down	PREDICTED: zinc finger protein KNUCKLES-like [Cucumis sativus]
CmoCh14G018470	2	0	0.06	0.001	-4.02862	0.0312501	0.0472645	down	PREDICTED: probable inorganic phosphate transporter 1-3 [Cucumis melo]// XP_008438530.1 PREDICTED: probable inorganic phosphate transporter 1-3 [Cucumis melo]
CmoCh14G018490	129	7	4.65	0.26	-4.05288	5.33435e-81	7.62524e-80	down	phosphate transporter [Cucurbita maxima x Cucurbita moschata]
CmoCh14G018510	3	0	0.24	0.001	-4.58381	0.00390629	0.00682066	down	myb-related transcription factor [Citrullus lanatus]
CmoCh14G018520	9	3	9.3	3.61	-1.42136	0.0113314	0.0186121	down	-
CmoCh14G018560	2	0	0.3	0.001	-4.02862	0.0312501	0.0472645	down	hypothetical protein Csa_3G134950 [Cucumis sativus]
CmoCh14G018910	1228	448	59.96	22.99	-1.32647	1.59352e-218	5.97517e-217	down	PREDICTED: auxin-responsive protein IAA13 isoform X1 [Cucumis melo]
CmoCh14G018920	18	5	10.1	3.16	-1.69632	1.40765e-05	3.24752e-05	down	-
CmoCh14G018970	3	0	0.2	0.001	-4.58381	0.00390629	0.00682066	down	PREDICTED: transcription factor MYB24-like [Cucumis melo]
CmoCh14G019020	230	72	5.79	1.9	-1.54595	1.16259e-49	1.10448e-48	down	PREDICTED: beta-amylase 1, chloroplastic-like [Cucumis melo]
CmoCh14G019030	31	14	1.31	0.62	-1.0126	0.000118611	0.000249689	down	PREDICTED: probable indole-3-pyruvate monooxygenase YUCCA3 [Cucumis melo]
CmoCh14G019040	1076	463	29.82	13.44	-1.08836	6.19846e-138	1.4416e-136	down	PREDICTED: 7-hydroxymethyl chlorophyll a reductase, chloroplastic [Cucumis melo]
CmoCh14G019050	15	3	1.32	0.28	-2.15006	5.5513e-06	1.32279e-05	down	PREDICTED: probable glutathione S-transferase [Cucumis melo]
CmoCh14G019060	25	10	2.5	1.06	-1.18427	0.000109622	0.000231561	down	PREDICTED: probable glutathione S-transferase [Cucumis melo]
CmoCh14G019470	227	0	16.2	0.001	-10.7648	4.43644e-190	1.44015e-188	down	PREDICTED: probable calcium-binding protein CML22 [Cucumis melo]// XP_008438357.1 PREDICTED: probable calcium-binding protein CML22 [Cucumis melo]
CmoCh14G019480	184	81	3.17	1.46	-1.05457	8.79581e-23	4.64125e-22	down	PREDICTED: ubiquitin carboxyl-terminal hydrolase 2 [Cucumis melo]
CmoCh14G019960	182	52	9.25	2.78	-1.67704	4.02273e-44	3.48527e-43	down	PREDICTED: protein ECERIFERUM 1-like isoform X1 [Cucumis melo]
CmoCh14G020180	6	1	0.92	0.16	-2.32517	0.00257689	0.00466403	down	-
CmoCh14G020220	210	54	8.66	2.34	-1.82903	4.03363e-57	4.26745e-56	down	PREDICTED: probable glutathione S-transferase [Cucumis melo]
CmoCh14G020350	16	1	1.3	0.09	-3.72088	6.98274e-11	2.29784e-10	down	DUF1442 family protein [Medicago truncatula]// XP_013455045.1 DUF1442 family protein [Medicago truncatula]// KEH29092.1 DUF1442 family protein [Medicago truncatula]// AES87322.2 DUF1442 family protein [Medicago truncatula]
CmoCh14G020640	415.44	121	15.26	4.66	-1.64909	2.02114e-96	3.38001e-95	down	PREDICTED: UDP-galactose/UDP-glucose transporter 2-like [Cucumis melo]
CmoCh14G020660	49	18	2.87	1.11	-1.31104	1.48061e-09	4.50992e-09	down	PREDICTED: ethylene-responsive transcription factor ERF071-like [Cucumis melo]
CmoCh14G020740	2330	221	37.11	3.68	-3.26947	0	0	down	PREDICTED: homeobox-leucine zipper protein ANTHOCYANINLESS 2 [Cucumis melo]
CmoCh14G021170	63	7	2.59	0.3	-3.02046	3.9846e-32	2.71283e-31	down	PREDICTED: UDP-glycosyltransferase 91A1-like [Cucumis melo]
CmoCh14G021180	1987	570	81.55	24.56	-1.67331	0	0	down	PREDICTED: UDP-glycosyltransferase 91A1-like [Cucumis melo]
CmoCh14G021190	2158.2	438.95	63.41	13.51	-2.16906	0	0	down	PREDICTED: probable polygalacturonase [Cucumis melo]
CmoCh14G021270	187	77	5.69	2.45	-1.15084	2.39541e-26	1.40463e-25	down	PREDICTED: proline iminopeptidase [Cucumis melo]
CmoCh14G021460	11	3	1.08	0.31	-1.70712	0.000940733	0.0017873	down	PREDICTED: protein YLS9 isoform X1 [Eucalyptus grandis]// XP_010055052.1 PREDICTED: protein YLS9 isoform X1 [Eucalyptus grandis]// XP_010055053.1 PREDICTED: protein YLS9 isoform X1 [Eucalyptus grandis]// XP_010055054.1 PREDICTED: protein YLS9 isoform X1 [Eucalyptus grandis]// XP_010055055.1 PREDICTED: protein YLS9 isoform X1 [Eucalyptus grandis]// XP_018728544.1 PREDICTED: protein YLS9 isoform X1…
CmoCh14G021570	51	19	1.21	0.47	-1.2911	1.3069e-09	3.9936e-09	down	PREDICTED: jasmonic acid-amido synthetase JAR1 [Cucumis melo]// XP_008437925.1 PREDICTED: jasmonic acid-amido synthetase JAR1 [Cucumis melo]// XP_016899070.1 PREDICTED: jasmonic acid-amido synthetase JAR1 [Cucumis melo]// ADN34174.1 auxin-regulated protein [Cucumis melo subsp. melo]
CmoCh14G021650	5	0	4.28	0.001	-5.29651	6.10368e-05	0.00013234	down	-
CmoCh14G021690	16	5	1.97	0.65	-1.52769	0.000176348	0.000363783	down	PREDICTED: non-specific lipid-transfer protein Cw18-like [Cucumis sativus]
CmoCh14G021720	16	5	0.91	0.3	-1.52769	0.000176348	0.000363783	down	PREDICTED: calcineurin B-like protein 7 isoform X2 [Cucumis sativus]
CmoCh14G021730	7203	3052	290.27	129.09	-1.11077	0	0	down	PREDICTED: aspartyl protease family protein 2 [Cucumis melo]
CmoCh14G021780	206	26	15.75	2.1	-2.85232	5.34428e-95	8.80912e-94	down	DUF688 domain-containing protein [Cephalotus follicularis]
CmoCh14G021800	180	19	18.67	2.09	-3.10789	2.86248e-90	4.52351e-89	down	PREDICTED: pyridoxine/pyridoxamine 5'-phosphate oxidase 2 [Cucumis melo]// XP_016898998.1 PREDICTED: pyridoxine/pyridoxamine 5'-phosphate oxidase 2 [Cucumis melo]
CmoCh14G021810	42	4	8.24	0.84	-3.2263	2.24736e-23	1.20712e-22	down	PREDICTED: dof zinc finger protein DOF3.7 [Cucumis melo]
CmoCh14G021910	101	20	16.5	3.5	-2.20151	1.79241e-35	1.3166e-34	down	PREDICTED: microtubule-associated protein RP/EB family member 1-like [Cucumis melo]
CmoCh14G021920	52	2	4.68	0.19	-4.49232	2.45148e-36	1.83594e-35	down	PREDICTED: zyxin-like [Cucumis melo]
CmoCh14G022010	21	5	10.4	2.77	-1.91723	2.41827e-07	6.40225e-07	down	Os03g0315200 [Oryza sativa Japonica Group]
CmoCh14G022160	27	12	2.88	1.36	-1.03455	0.000258316	0.000523893	down	PREDICTED: ethylene-responsive transcription factor ERF038-like [Cucumis melo]
CmoCh14G022190	3	0	1.58	0.001	-4.58381	0.00390629	0.00682066	down	-
CmoCh14G022230	203	34	10.58	1.86	-2.4457	2.91548e-79	4.10791e-78	down	PREDICTED: squamosa promoter-binding-like protein 7 isoform X2 [Cucumis melo]
CmoCh14G022350	68	10	3.77	0.58	-2.62313	1.24449e-29	7.98005e-29	down	PREDICTED: zinc finger protein ZAT9 [Cucumis melo]
CmoCh14G022370	3	0	2.46	0.001	-4.58381	0.00390629	0.00682066	down	-
CmoCh15G000100	10	4	1.08	0.46	-1.17014	0.0195211	0.0309838	down	GST_N_3 domain-containing protein [Cephalotus follicularis]
CmoCh15G000340	424	133	92.39	31.25	-1.54375	6.58135e-90	1.03706e-88	down	PREDICTED: subtilisin-like protease SBT3.3 isoform X2 [Cucumis sativus]
CmoCh15G000500	5	1	1.54	0.34	-2.06827	0.012726	0.0207238	down	PREDICTED: probable metal-nicotianamine transporter YSL5, partial [Juglans regia]
CmoCh15G000510	42	5	8.9	1.14	-2.91276	9.11454e-21	4.53751e-20	down	zinc finger protein 6 [Corchorus capsularis]
CmoCh15G000620	18	7	20.62	9.4	-1.22054	0.000642884	0.00124616	down	-
CmoCh15G000670	10	3	3.99	1.32	-1.5713	0.00337801	0.00601043	down	PREDICTED: glutaredoxin-C1 [Cucumis melo]
CmoCh15G000730	13.36	4.68	128.56	57.53	-1.23082	0.00383851	0.00677226	down	BnaA06g32460D [Brassica napus]
CmoCh15G000840	7	1	1.48	0.23	-2.54317	0.000488299	0.000958718	down	PREDICTED: calcium-binding protein CML38 [Fragaria vesca subsp. vesca]
CmoCh15G000910	10	0	0.56	0.001	-6.27804	3.72569e-09	1.10838e-08	down	PREDICTED: serine/threonine protein phosphatase 2A 57 kDa regulatory subunit B' theta isoform-like [Cucumis melo]// ADN34067.1 protein phosphatase 2a [Cucumis melo subsp. melo]
CmoCh15G001040	8	1	3.02	0.42	-2.73251	8.79809e-05	0.000187486	down	PREDICTED: UPF0392 protein RCOM_0530710 isoform X2 [Cucumis sativus]
CmoCh15G001100	331.43	135.31	5.8	2.47	-1.16512	1.89979e-46	1.71441e-45	down	PREDICTED: ribulose bisphosphate carboxylase/oxygenase activase, chloroplastic [Cucumis melo]// ADN34076.1 ribulose bisphosphate carboxylase/oxygenase activase 1 [Cucumis melo subsp. melo]
CmoCh15G001110	4	0	0.36	0.001	-4.98373	0.00048829	0.000958718	down	PREDICTED: AT-hook motif nuclear-localized protein 22 [Cucumis melo]
CmoCh15G001120	30	5	1.16	0.2	-2.42912	5.39756e-13	1.97894e-12	down	transferring glycosyl group transferase [Medicago truncatula]// KEH34744.1 transferring glycosyl group transferase [Medicago truncatula]
CmoCh15G001260	365	118	24.58	8.38	-1.50012	2.09348e-74	2.77787e-73	down	RING/FYVE/PHD zinc finger superfamily protein [Theobroma cacao]
CmoCh15G001330	32	2	1.21	0.08	-3.79414	2.72876e-20	1.33602e-19	down	PREDICTED: uncharacterized acetyltransferase At3g50280 [Cucumis sativus]// KGN45772.1 Anthocyanin 5-aromatic acyltransferase [Cucumis sativus]
CmoCh15G001460	98	25	6.74	1.81	-1.83786	6.67735e-28	4.08678e-27	down	alpha/beta hydrolase-like protein [Medicago truncatula]// AES71131.1 alpha/beta hydrolase-like protein [Medicago truncatula]
CmoCh15G001540	20	5	30.52	9.08	-1.84728	9.67711e-07	2.45637e-06	down	-
CmoCh15G001610	2	0	0.06	0.001	-4.02862	0.0312501	0.0472645	down	PREDICTED: laccase-12 [Cucumis melo]
CmoCh15G001670	2	0	0.33	0.001	-4.02862	0.0312501	0.0472645	down	hypoxia-responsive family protein [Medicago truncatula]// AES71277.1 hypoxia-responsive family protein [Medicago truncatula]
CmoCh15G001700	4	0	0.24	0.001	-4.98373	0.00048829	0.000958718	down	PREDICTED: LOB domain-containing protein 15-like isoform X1 [Juglans regia]
CmoCh15G001890	55	18	11.66	4.11	-1.47727	2.4617e-12	8.72259e-12	down	PREDICTED: protein NETWORKED 4A [Cucumis melo]
CmoCh15G002370	36	4	1.52	0.18	-3.00465	8.49916e-19	3.93675e-18	down	UDPGT domain-containing protein [Cephalotus follicularis]
CmoCh15G002440	544	212	7.98	3.25	-1.23103	6.4904e-82	9.34564e-81	down	PREDICTED: protein LONGIFOLIA 2 [Cucumis melo]
CmoCh15G002500	42	11	1.77	0.49	-1.79374	1.75104e-12	6.25274e-12	down	PREDICTED: UDP-glycosyltransferase 83A1 [Cucumis melo]
CmoCh15G002750	65	12	11.46	2.27	-2.29797	1.37402e-24	7.65472e-24	down	PREDICTED: probable calcium-binding protein CML30 [Cucumis melo]
CmoCh15G002920	8738.76	3721	97.17	43.23	-1.10371	0	0	down	PREDICTED: ABC transporter B family member 19 [Cucumis melo]
CmoCh15G003150	8.43	1	0.42	0.05	-2.73251	8.79809e-05	0.000187486	down	PREDICTED: ABC transporter B family member 15-like [Cucumis melo]
CmoCh15G003420	2271	1007	52.71	24.47	-1.04513	2.05684e-269	9.67349e-268	down	PREDICTED: 2-methylene-furan-3-one reductase-like [Cucumis melo]
CmoCh15G003530	7	1	0.39	0.06	-2.54317	0.000488299	0.000958718	down	PREDICTED: universal stress protein A-like protein [Cucumis melo]
CmoCh15G003560	11	3	0.89	0.26	-1.70712	0.000940733	0.0017873	down	PREDICTED: myb-related protein 340-like [Cucumis melo]
CmoCh15G003830	3	0	0.55	0.001	-4.58381	0.00390629	0.00682066	down	PREDICTED: mitochondrial inner membrane protease ATP23 isoform X2 [Eucalyptus grandis]
CmoCh15G003840	41	16	2.81	1.16	-1.22337	2.71041e-07	7.15028e-07	down	PREDICTED: protein ALWAYS EARLY 2-like [Cicer arietinum]
CmoCh15G003850	32	9	2.53	0.75	-1.68888	5.2114e-09	1.5394e-08	down	PREDICTED: zinc finger protein CONSTANS-LIKE 6 [Cucumis melo]
CmoCh15G004020	8.16	1.97	1.28	0.33	-1.81162	0.00231579	0.00421803	down	PREDICTED: heat shock cognate 70 kDa protein 2-like isoform X1 [Ziziphus jujuba]// XP_015876924.1 PREDICTED: heat shock cognate 70 kDa protein 2-like isoform X2 [Ziziphus jujuba]
CmoCh15G004210	8	1	2.84	0.39	-2.73251	8.79809e-05	0.000187486	down	-
CmoCh15G004290	15	5	6.24	2.3	-1.43536	0.00058442	0.00113836	down	PREDICTED: psbP-like protein 1, chloroplastic [Cucumis melo]
CmoCh15G004330	5	0	0.32	0.001	-5.29651	6.10368e-05	0.00013234	down	PREDICTED: dirigent protein 10 [Cucumis melo]
CmoCh15G004340	11	1	0.26	0.02	-3.18561	4.17743e-07	1.08839e-06	down	PREDICTED: ABC transporter G family member 6 [Cucumis melo]
CmoCh15G004790	16	4	1.82	0.48	-1.84123	1.91705e-05	4.35926e-05	down	PREDICTED: probable lysine-specific demethylase ELF6 [Cucumis melo]
CmoCh15G005350	50	15	1.26	0.4	-1.60124	1.61941e-12	5.79323e-12	down	PREDICTED: cationic amino acid transporter 6, chloroplastic [Cucumis melo]
CmoCh15G005470	314	141	14.69	6.93	-1.02641	2.99228e-36	2.23792e-35	down	PREDICTED: probable mitochondrial import inner membrane translocase subunit TIM21 isoform X1 [Cucumis melo]
CmoCh15G006050	886	393	63.03	29.48	-1.04451	2.59181e-106	4.69936e-105	down	PREDICTED: sm-like protein LSM3A [Gossypium hirsutum]// XP_017647362.1 PREDICTED: sm-like protein LSM3A [Gossypium arboreum]// KHG28334.1 U6 snRNA-associated Sm-like protein LSm3 [Gossypium arboreum]
CmoCh15G006220	49	1	8.01	0.17	-5.32771	4.19918e-37	3.1996e-36	down	PREDICTED: translation initiation factor IF-2 isoform X1 [Oryza sativa Japonica Group]
CmoCh15G006250	18	7	0.95	0.39	-1.22054	0.000642884	0.00124616	down	PREDICTED: pleckstrin homology domain-containing family A member 8 [Cucumis sativus]
CmoCh15G006360	212	42	14.16	2.96	-2.20435	2.66885e-73	3.50421e-72	down	PREDICTED: bidirectional sugar transporter SWEET1 [Cucumis melo]// XP_016899392.1 PREDICTED: bidirectional sugar transporter SWEET1 [Cucumis melo]
CmoCh15G006440	2	0	0.16	0.001	-4.02862	0.0312501	0.0472645	down	PREDICTED: chaperone protein dnaJ 10 isoform X2 [Cucumis melo]
CmoCh15G006520	6.45	0	2.06	0.001	-5.55341	1.52593e-05	3.49815e-05	down	PREDICTED: protein STAY-GREEN LIKE, chloroplastic [Cucumis sativus]// KGN47507.1 hypothetical protein Csa_6G349840 [Cucumis sativus]
CmoCh15G006710	288.23	54.57	5.52	1.09	-2.25805	1.48683e-101	2.59021e-100	down	PREDICTED: beta-galactosidase 16 isoform X2 [Cucumis melo]
CmoCh15G006740	87	34	3.71	1.52	-1.22454	3.05454e-14	1.18618e-13	down	NAC domain transcription factor 2 [Citrullus colocynthis]
CmoCh15G006810	125	41	12.6	4.38	-1.4775	6.67349e-26	3.87203e-25	down	PREDICTED: two-component response regulator ORR9-like isoform X2 [Cucumis melo]
CmoCh15G006820	17.63	3	13.83	2.7	-2.41101	5.71492e-08	1.57929e-07	down	PREDICTED: two-component response regulator ORR9-like isoform X2 [Cucumis melo]
CmoCh15G007110	326	141	11.08	5.02	-1.08049	8.41251e-41	6.84324e-40	down	PREDICTED: flavonol synthase/flavanone 3-hydroxylase [Cucumis melo]
CmoCh15G007120	88	38	2.57	1.16	-1.08107	5.64733e-12	1.96466e-11	down	PREDICTED: auxin transporter-like protein 3 [Cucumis melo]
CmoCh15G007150	16	5	0.8	0.26	-1.52769	0.000176348	0.000363783	down	C2H2-like zinc finger protein [Theobroma cacao]
CmoCh15G007270	3	0	0.06	0.001	-4.58381	0.00390629	0.00682066	down	PREDICTED: nitrate reductase [NADH] [Cucumis melo]
CmoCh15G007290	2872	1217	47.3	20.96	-1.11061	0	0	down	RecName: Full=Nitrate reductase [NADH]; Short=NR// AAA33114.1 nitrate reductase [Cucurbita maxima]
CmoCh15G007320	7	0	2.11	0.001	-5.77141	1.90744e-06	4.7317e-06	down	-
CmoCh15G007400	2	0	0.37	0.001	-4.02862	0.0312501	0.0472645	down	PREDICTED: protein MARD1-like [Cucumis melo]
CmoCh15G007450	6	1	17.25	3.52	-2.32517	0.00257689	0.00466403	down	-
CmoCh15G007780	115	3	14.54	0.4	-5.07779	7.43225e-83	1.08091e-81	down	PREDICTED: probable transcription factor KAN2 [Cucumis melo]
CmoCh15G007850	56	20	1.36	0.51	-1.35215	5.52939e-11	1.83227e-10	down	PREDICTED: probable inactive receptor kinase At3g02880 [Cucumis melo]
CmoCh15G007890	2	0	0.15	0.001	-4.02862	0.0312501	0.0472645	down	PREDICTED: universal stress protein A-like protein [Cucumis melo]
CmoCh15G007990	27	8	6.08	1.94	-1.61242	3.27886e-07	8.60295e-07	down	hypothetical protein Csa_5G320420 [Cucumis sativus]
CmoCh15G008120	33	15	0.46	0.22	-1.00371	0.000104978	0.000222041	down	E1-E2_ATPase domain-containing protein/Cation_ATPase_C domain-containing protein/Cation_ATPase_N domain-containing protein/Hydrolase domain-containing protein/CaATP_NAI domain-containing protein [Cephalotus follicularis]
CmoCh15G008480	560	254	20.81	9.9	-1.01221	5.2893e-62	6.03116e-61	down	PREDICTED: uridine 5'-monophosphate synthase [Cucumis melo]
CmoCh15G008630	322	63	7.34	1.5	-2.22345	1.6088e-111	3.04942e-110	down	PREDICTED: phosphatidylinositol 4-phosphate 5-kinase 6-like [Cucumis melo]// XP_008465847.1 PREDICTED: phosphatidylinositol 4-phosphate 5-kinase 6-like [Cucumis melo]// XP_008465851.1 PREDICTED: phosphatidylinositol 4-phosphate 5-kinase 6-like [Cucumis melo]
CmoCh15G008880	2.99	0	0.17	0.001	-4.58381	0.00390629	0.00682066	down	PREDICTED: chitinase 10 [Cucumis sativus]
CmoCh15G009320	286	119	15.79	6.91	-1.13622	7.71222e-39	6.03264e-38	down	PREDICTED: vacuolar iron transporter 1-like [Cucumis melo]
CmoCh15G009410	2056	772	34.94	13.72	-1.28499	0	0	down	PREDICTED: alpha-xylosidase 1 [Cucumis melo]
CmoCh15G009480	135	29	5.41	1.22	-2.08626	4.52207e-44	3.9142e-43	down	PREDICTED: probable transcription factor GLK2 [Cucumis melo]
CmoCh15G009500	93	1	5.94	0.07	-6.25034	4.27975e-73	5.59535e-72	down	PREDICTED: adenylate isopentenyltransferase-like [Cucumis melo]
CmoCh15G009510	21	8	1.44	0.58	-1.25183	0.000130402	0.000273132	down	-
CmoCh15G009540	1208	0	61.48	0.001	-13.176	0	0	down	PREDICTED: transcription factor BEE 3-like [Jatropha curcas]
CmoCh15G009750	2	0	1.5	0.001	-4.02862	0.0312501	0.0472645	down	PREDICTED: probable E3 ubiquitin-protein ligase RHA2B [Cucumis sativus]
CmoCh15G009810	488.11	215	9.53	4.39	-1.05409	6.87182e-58	7.38352e-57	down	PREDICTED: auxin efflux carrier component 4-like isoform X1 [Cucumis melo]
CmoCh15G009940	12	5	2.05	0.91	-1.11654	0.0109741	0.0180619	down	DUF4228 domain-containing protein, partial [Cephalotus follicularis]
CmoCh15G010300	43	13	2.32	0.74	-1.58896	1.36089e-10	4.4104e-10	down	PREDICTED: zinc finger protein CONSTANS-LIKE 6 [Cucumis melo]// ADN34083.1 zinc finger (B-box type) family protein [Cucumis melo subsp. melo]
CmoCh15G010340	7	0	0.57	0.001	-5.77141	1.90744e-06	4.7317e-06	down	PREDICTED: zinc finger protein JAGGED [Cucumis sativus]
CmoCh15G010410	5	0	0.22	0.001	-5.29651	6.10368e-05	0.00013234	down	reverse transcriptase [Corchorus capsularis]
CmoCh15G010450	5	0	0.22	0.001	-5.29651	6.10368e-05	0.00013234	down	PREDICTED: probable LRR receptor-like serine/threonine-protein kinase At4g36180 [Cucumis melo]
CmoCh15G010510	424	34	27.88	2.36	-3.5078	2.81999e-235	1.1463e-233	down	PREDICTED: AP2/ERF and B3 domain-containing transcription factor RAV1-like [Cucumis sativus]
CmoCh15G010600	2.85	0.22	0.7	0.06	-4.58381	0.00390629	0.00682066	down	PREDICTED: protein TAR1-like [Cicer arietinum]
CmoCh15G010850	8	0	2.06	0.001	-5.96075	2.38434e-07	6.31669e-07	down	hypothetical protein Csa_5G139320 [Cucumis sativus]
CmoCh15G010960	2	0	1.64	0.001	-4.02862	0.0312501	0.0472645	down	-
CmoCh15G011080	108	42	3.92	1.6	-1.23217	1.965e-17	8.69269e-17	down	PREDICTED: cytochrome P450 89A2-like [Cucumis melo]
CmoCh15G011140	5	0	0.55	0.001	-5.29651	6.10368e-05	0.00013234	down	probable membrane-associated kinase regulator 6 [Cajanus cajan]
CmoCh15G011420	656	202	20.11	6.49	-1.57073	1.59351e-141	3.81888e-140	down	PREDICTED: protein TRANSPARENT TESTA 12-like [Cucumis sativus]
CmoCh15G011770	29	5	4.82	0.89	-2.38043	2.6075e-12	9.22263e-12	down	PREDICTED: WAT1-related protein At5g47470 [Cucumis melo]
CmoCh15G011820	31	10	104.94	41.77	-1.49316	1.44961e-07	3.89882e-07	down	PREDICTED: probable pectinesterase 68, partial [Cucumis melo]
CmoCh15G012050	10	0	1.26	0.001	-6.27804	3.72569e-09	1.10838e-08	down	PLATZ domain-containing protein [Cephalotus follicularis]
CmoCh15G012090	623	237	33.8	13.52	-1.26588	1.04606e-97	1.77085e-96	down	PREDICTED: axial regulator YABBY 5-like [Cucumis sativus]// KGN50218.1 Axial regulator YABBY1 [Cucumis sativus]
CmoCh15G012170	2	0	0.11	0.001	-4.02862	0.0312501	0.0472645	down	PREDICTED: protein ODORANT1-like [Cucumis melo]
CmoCh15G012190	125.25	11.28	3.48	0.33	-3.36423	2.15167e-68	2.65919e-67	down	PREDICTED: flavonoid 3'-monooxygenase-like [Cucumis melo]
CmoCh15G012200	13	1	0.47	0.04	-3.42401	1.04808e-08	3.03991e-08	down	PREDICTED: flavonoid 3'-monooxygenase-like [Cucumis melo]
CmoCh15G012210	764.75	180.72	21.31	5.27	-1.95072	1.10367e-221	4.19545e-220	down	PREDICTED: flavonoid 3'-monooxygenase-like [Cucumis melo]
CmoCh15G012360	4	0	0.31	0.001	-4.98373	0.00048829	0.000958718	down	PREDICTED: AT-hook motif nuclear-localized protein 22 [Cucumis melo]
CmoCh15G012400	61	9	5.07	0.79	-2.61683	1.46081e-26	8.61912e-26	down	PREDICTED: protein LITTLE ZIPPER 1 [Theobroma cacao]
CmoCh15G012410	7	0	0.78	0.001	-5.77141	1.90744e-06	4.7317e-06	down	PREDICTED: blue copper protein-like [Cucumis melo]
CmoCh15G012550	1225	522	14.73	6.56	-1.10244	3.49416e-160	9.32228e-159	down	Glucose-methanol-choline oxidoreductase, C-terminal, partial [Cynara cardunculus var. scolymus]
CmoCh15G012620	5	0	0.49	0.001	-5.29651	6.10368e-05	0.00013234	down	PREDICTED: ethylene-responsive transcription factor ERF027 [Cucumis melo]
CmoCh15G012690	273	92	9.19	3.25	-1.43997	8.93393e-53	8.85999e-52	down	PREDICTED: bifunctional UDP-glucose 4-epimerase and UDP-xylose 4-epimerase 1 [Cucumis melo]
CmoCh15G013100	329	49	7.77	1.21	-2.61625	2.85858e-137	6.59268e-136	down	PREDICTED: LOW QUALITY PROTEIN: homeobox protein BEL1 homolog [Cucumis melo]
CmoCh15G013340	14	2	0.95	0.14	-2.60901	6.24134e-07	1.60473e-06	down	PREDICTED: ethylene-responsive transcription factor CRF2-like [Cucumis melo]
CmoCh15G013790	6	0	0.27	0.001	-5.55341	1.52593e-05	3.49815e-05	down	PREDICTED: methionine gamma-lyase-like [Cucumis melo]
CmoCh15G013810	239	71	12.89	4.03	-1.62144	4.13593e-55	4.25322e-54	down	PREDICTED: protein BRANCHLESS TRICHOME [Cucumis melo]
CmoCh15G013850	27	9	1.29	0.45	-1.44486	2.35263e-06	5.80523e-06	down	PREDICTED: alcohol dehydrogenase-like 4 [Cucumis melo]
CmoCh15G014010	131	14	10.52	1.19	-3.08721	7.94743e-66	9.48186e-65	down	PREDICTED: B3 domain-containing transcription factor NGA1 [Theobroma cacao]
CmoCh15G014020	2	0	0.43	0.001	-4.02862	0.0312501	0.0472645	down	PREDICTED: ethylene-responsive transcription factor ERF096-like [Cucumis melo]
CmoCh15G014100	58	22	1.89	0.75	-1.26594	1.79672e-10	5.78342e-10	down	PREDICTED: probable receptor-like protein kinase At1g33260 [Cucumis melo]
CmoCh15G014140	2	0	8.04	0.001	-4.02862	0.0312501	0.0472645	down	PREDICTED: 8-amino-7-oxononanoate synthase isoform X1 [Cucumis melo]
CmoCh15G014220	273	90	31	10.85	-1.47164	1.16364e-54	1.1891e-53	down	PREDICTED: ethylene-responsive transcription factor ERF105 [Cucumis melo]
CmoCh15G014240	2	0	0.24	0.001	-4.02862	0.0312501	0.0472645	down	PREDICTED: stellacyanin [Cucumis melo]
CmoCh15G014340	51	13	1.61	0.43	-1.83444	4.76886e-15	1.91087e-14	down	PREDICTED: glutamate dehydrogenase 2-like [Cucumis melo]
CmoCh15G014370	275	124	15.36	7.29	-1.02035	9.82546e-32	6.61916e-31	down	rubredoxin family protein [Phaseolus vulgaris]// AGV54669.1 rubredoxin family protein [Phaseolus vulgaris]
CmoCh15G014400	211	78	16.11	6.29	-1.30634	6.0846e-36	4.51999e-35	down	PREDICTED: serine/threonine-protein kinase TIO [Cucumis melo]
CmoCh15G014480	207	86	6.26	2.72	-1.13809	1.12974e-28	7.07145e-28	down	Cryptochrome DASH, chloroplastic/mitochondrial [Glycine soja]
CmoCh15G014590	16	3	0.65	0.13	-2.24239	1.24566e-06	3.13634e-06	down	PREDICTED: gibberellin 20 oxidase 1-D [Cucumis sativus]// CBX88043.1 gibberellin 20-oxidase, partial [Cucumis sativus]// KGN50396.1 Gibberellin 20-oxidase [Cucumis sativus]
CmoCh15G014620	3	0	0.34	0.001	-4.58381	0.00390629	0.00682066	down	PREDICTED: MADS-box protein SOC1 isoform X1 [Cucumis sativus]
CmoCh15G014630	16	4	24.42	7.26	-1.84123	1.91705e-05	4.35926e-05	down	PREDICTED: MADS-box protein AGL42-like [Cucumis melo]// XP_016903703.1 PREDICTED: MADS-box protein AGL42-like [Cucumis melo]
CmoCh15G014820	208	32	8.07	1.3	-2.56793	9.13582e-86	1.38039e-84	down	PREDICTED: probable (S)-N-methylcoclaurine 3'-hydroxylase isozyme 2 [Cucumis melo]
CmoCh15G014850	10	2	0.38	0.08	-2.1289	0.00011685	0.000246169	down	PREDICTED: probable (S)-N-methylcoclaurine 3'-hydroxylase isozyme 2 [Cucumis melo]
CmoCh15G015220	14	6	2.68	1.23	-1.0793	0.00864201	0.0144497	down	PREDICTED: uncharacterized protein LOC103485749 [Cucumis melo]
CmoCh16G000030	26	11	1.44	0.64	-1.10461	0.000172421	0.000356189	down	DUF599 domain-containing protein [Cephalotus follicularis]
CmoCh16G000130	967	420	41.43	18.89	-1.07487	1.38036e-121	2.87548e-120	down	PREDICTED: heavy metal-associated isoprenylated plant protein 3 [Juglans regia]
CmoCh16G000210	1934	430	37.89	8.81	-2.04083	0	0	down	PREDICTED: subtilisin-like protease SBT3.5 [Theobroma cacao]
CmoCh16G000230	2	0	17.33	0.001	-4.02862	0.0312501	0.0472645	down	hypothetical protein TSUD_302310 [Trifolium subterraneum]
CmoCh16G000310	48.56	0	0.58	0.001	-8.55595	2.58956e-41	2.12469e-40	down	OSJNBb0026E15.10 [Oryza sativa Japonica Group]
CmoCh16G000330	147	11	3.62	0.28	-3.5979	4.02442e-84	5.9407e-83	down	PREDICTED: metal-nicotianamine transporter YSL3 isoform X1 [Cucumis melo]// XP_016901904.1 PREDICTED: metal-nicotianamine transporter YSL3 isoform X1 [Cucumis melo]
CmoCh16G000350	281.16	72	10.85	2.92	-1.83474	4.37922e-76	5.93078e-75	down	PREDICTED: ATPase family AAA domain-containing protein 1-B-like [Cucumis melo]
CmoCh16G000400	43	12	4.74	1.4	-1.70334	1.61311e-11	5.49058e-11	down	PREDICTED: dof zinc finger protein DOF1.8-like [Cucumis melo]
CmoCh16G000420	389.46	154.97	22.71	9.51	-1.19883	1.36073e-56	1.42973e-55	down	PREDICTED: thylakoid lumenal 17.4 kDa protein, chloroplastic [Cucumis melo]
CmoCh16G000510	3	0	0.53	0.001	-4.58381	0.00390629	0.00682066	down	-
CmoCh16G000620	102	39	11.07	4.49	-1.25641	3.63382e-17	1.58965e-16	down	PREDICTED: vesicle transport protein SFT2B [Cucumis melo]
CmoCh16G000730	148	58	4.12	1.69	-1.22173	3.27594e-23	1.75106e-22	down	PREDICTED: RNA polymerase sigma factor sigE, chloroplastic/mitochondrial [Cucumis melo]
CmoCh16G000740	3	0	0.16	0.001	-4.58381	0.00390629	0.00682066	down	PREDICTED: probable WRKY transcription factor 53 [Cucumis melo]
CmoCh16G001120	59	20	1.37	0.49	-1.42727	1.94073e-12	6.90773e-12	down	PREDICTED: probable receptor-like protein kinase At5g24010 [Cucumis melo]
CmoCh16G001170	112	41	5.28	2.03	-1.31924	6.14176e-20	2.96492e-19	down	PREDICTED: F-box/kelch-repeat protein At3g23880-like [Cucumis melo]
CmoCh16G001210	1511	688	46.34	22.11	-1.00686	5.40465e-169	1.54355e-167	down	PREDICTED: BAHD acyltransferase DCR [Cucumis melo]
CmoCh16G001460	38	8	0.74	0.16	-2.10345	1.70708e-13	6.39834e-13	down	PREDICTED: homeobox-leucine zipper protein ANTHOCYANINLESS 2 isoform X1 [Cucumis melo]
CmoCh16G001530	2	0	0.62	0.001	-4.02862	0.0312501	0.0472645	down	-
CmoCh16G001620	202	92	12.44	5.97	-1.00567	4.36719e-23	2.32624e-22	down	PREDICTED: transcription factor TCP19 [Cucumis melo]
CmoCh16G001670	53	3	0.95	0.06	-3.96213	2.02859e-33	1.42296e-32	down	Kinase superfamily protein isoform 1 [Theobroma cacao]
CmoCh16G001870	1007.47	415.73	60.78	26.41	-1.14714	3.9302e-141	9.40245e-140	down	PREDICTED: hypersensitive-induced response protein 4 [Cucumis melo]
CmoCh16G001880	137	57	10.29	4.52	-1.13545	1.97803e-19	9.36513e-19	down	DUF1442 domain-containing protein [Cephalotus follicularis]
CmoCh16G002100	2	0	4.92	0.001	-4.02862	0.0312501	0.0472645	down	hypothetical protein Csa_3G175610 [Cucumis sativus]
CmoCh16G002350	84	31	3.12	1.21	-1.30677	4.13843e-15	1.66431e-14	down	DUF676 domain-containing protein [Cephalotus follicularis]
CmoCh16G002390	2	0	0.24	0.001	-4.02862	0.0312501	0.0472645	down	PREDICTED: zinc finger CCCH domain-containing protein 54 [Cucumis melo]
CmoCh16G002960	442	74	24.96	4.4	-2.44851	1.79832e-170	5.19514e-169	down	PREDICTED: MADS-box protein JOINTLESS-like [Cucumis sativus]
CmoCh16G003020	1076	311	24.28	7.34	-1.66227	1.50448e-276	7.28709e-275	down	PREDICTED: oligopeptide transporter 4 [Cucumis sativus]
CmoCh16G003140	309.04	132	11.8	5.29	-1.09833	1.13414e-39	9.00779e-39	down	PREDICTED: protein trichome birefringence-like 13 [Cucumis melo]
CmoCh16G003190	46	20	3.35	1.54	-1.06909	6.37204e-07	1.63757e-06	down	aspartyl-tRNA synthetase [Cucumis melo subsp. melo]
CmoCh16G003440	192	37	4.9	0.99	-2.2438	6.37775e-68	7.83642e-67	down	PREDICTED: BTB/POZ domain-containing protein NPY2 [Cucumis melo]
CmoCh16G003530	2	0	19.25	0.001	-4.02862	0.0312501	0.0472645	down	hypothetical protein Csa_3G198500 [Cucumis sativus]
CmoCh16G003590	15	6	0.75	0.32	-1.17795	0.0031563	0.00564488	down	PREDICTED: alpha-L-fucosidase 2 [Cucumis melo]
CmoCh16G003720	38	1	1.43	0.04	-4.96204	6.67334e-28	4.08523e-27	down	leucine-rich repeat family protein [Citrus trifoliata]
CmoCh16G004370	21	1	4.58	0.23	-4.11042	3.92031e-14	1.51364e-13	down	PREDICTED: 50S ribosomal protein L33-like [Malus domestica]// XP_008382022.1 PREDICTED: 50S ribosomal protein L33-like [Malus domestica]// XP_017190833.1 PREDICTED: 50S ribosomal protein L33-like [Malus domestica]// XP_017189642.1 PREDICTED: 50S ribosomal protein L33-like [Malus domestica]
CmoCh16G004380	10	4	0.74	0.31	-1.17014	0.0195211	0.0309838	down	PREDICTED: protein CUP-SHAPED COTYLEDON 2-like [Cucumis melo]
CmoCh16G004630	2467	821	89.98	31.41	-1.45913	0	0	down	PREDICTED: BES1/BZR1 homolog protein 4 [Cucumis melo]
CmoCh16G004780	1770.39	596.73	78.65	27.84	-1.43972	0	0	down	PREDICTED: epidermis-specific secreted glycoprotein EP1-like [Cucumis melo]
CmoCh16G004790	617.61	240.27	27.44	11.21	-1.23612	1.86247e-93	3.02117e-92	down	PREDICTED: epidermis-specific secreted glycoprotein EP1-like [Cucumis melo]
CmoCh16G004950	285	108	9.13	3.63	-1.27096	9.45638e-46	8.43696e-45	down	9-cis-epoxycarotenoid dioxygenase NCED1 [Luffa aegyptiaca]
CmoCh16G005030	55.81	7	2.29	0.3	-2.85091	6.16507e-27	3.68807e-26	down	PREDICTED: serine/threonine-protein kinase WAG1 [Cucumis melo]
CmoCh16G005160	3527	1411	173.28	72.86	-1.19361	0	0	down	PREDICTED: oxygen-evolving enhancer protein 2, chloroplastic [Cucumis melo]
CmoCh16G005360	2	0	5.75	0.001	-4.02862	0.0312501	0.0472645	down	-
CmoCh16G005380	7	0	0.31	0.001	-5.77141	1.90744e-06	4.7317e-06	down	PREDICTED: probable pectinesterase 8 [Cucumis melo]
CmoCh16G005450	63.32	23.06	13.24	5.2	-1.32119	6.46791e-12	2.24306e-11	down	carotenoid cleavage dioxygenase 4 [Momordica charantia]
CmoCh16G005470	17.42	7.13	1.87	0.81	-1.13869	0.00182058	0.00335665	down	carotenoid cleavage dioxygenase 4 [Momordica charantia]
CmoCh16G005510	70	21	2.07	0.65	-1.60343	6.63446e-17	2.86952e-16	down	-
CmoCh16G005560	33	6	2.48	0.48	-2.30864	4.25193e-13	1.56599e-12	down	hypothetical protein Csa_4G056540 [Cucumis sativus]
CmoCh16G005640	710.02	2.11	71.44	0.23	-8.2602	0	0	down	F-box/RNI-like superfamily protein [Theobroma cacao]
CmoCh16G005830	58	19	4.7	1.63	-1.47621	9.49392e-13	3.43692e-12	down	PREDICTED: cellulose synthase-like protein G3 [Cucumis melo]
CmoCh16G005850	1948	716	39.72	15.28	-1.31578	0	0	down	PREDICTED: auxin response factor 18-like [Cucumis melo]
CmoCh16G006010	164	38	11.56	2.82	-1.9782	1.0153e-49	9.66221e-49	down	PREDICTED: ethylene-responsive transcription factor ERF061-like [Cucumis sativus]
CmoCh16G006050	6	1	3.12	0.58	-2.32517	0.00257689	0.00466403	down	PREDICTED: probable WRKY transcription factor 41 [Cucumis melo]
CmoCh16G006250	1665	648	42.92	17.49	-1.23326	8.05342e-262	3.65053e-260	down	PREDICTED: probable membrane-associated kinase regulator 2 [Cucumis melo]
CmoCh16G006300	16	5	0.94	0.31	-1.52769	0.000176348	0.000363783	down	PREDICTED: probable WRKY transcription factor 29 [Cucumis melo]
CmoCh16G006470	155	26	10.83	1.92	-2.44224	9.34011e-61	1.0447e-59	down	PREDICTED: B3 domain-containing transcription factor NGA1-like [Cucumis sativus]// XP_011653181.1 PREDICTED: B3 domain-containing transcription factor NGA1-like [Cucumis sativus]// XP_011653182.1 PREDICTED: B3 domain-containing transcription factor NGA1-like [Cucumis sativus]
CmoCh16G006490	3447	1530	70.94	32.95	-1.04371	0	0	down	PREDICTED: subtilisin-like protease SBT3.7 isoform X1 [Cucumis melo]
CmoCh16G006700	30	13	0.81	0.37	-1.07148	5.87905e-05	0.000128186	down	PREDICTED: laccase-11-like [Cucumis melo]
CmoCh16G006780	12	0	0.63	0.001	-6.53797	5.82167e-11	1.92658e-10	down	PREDICTED: monoacylglycerol lipase ABHD6 [Ziziphus jujuba]
CmoCh16G006910	3	0	0.39	0.001	-4.58381	0.00390629	0.00682066	down	PREDICTED: peroxidase 72-like [Cucumis melo]
CmoCh16G006990	197	36	11.13	2.14	-2.32026	1.42575e-72	1.85347e-71	down	PREDICTED: protein SHI RELATED SEQUENCE 1-like [Cucumis melo]
CmoCh16G007030	2085	723	92.1	33.54	-1.39979	0	0	down	PREDICTED: GATA transcription factor 5-like [Cucumis melo]
CmoCh16G007040	942	244	44.51	12.11	-1.8203	7.8767e-249	3.424e-247	down	PREDICTED: receptor-like protein kinase 5 [Cucumis melo]
CmoCh16G007050	490	223	16.18	7.72	-1.00731	5.32868e-54	5.38337e-53	down	PREDICTED: aldehyde dehydrogenase family 3 member F1 [Cucumis melo]
CmoCh16G007080	1847	688	52.75	20.58	-1.29651	2.50186943932462e-315	1.40145369404222e-313	down	PREDICTED: protein indeterminate-domain 1-like [Cucumis melo]
CmoCh16G007250	9	3	6.02	2.28	-1.42136	0.0113314	0.0186121	down	-
CmoCh16G007440	53	22	1.65	0.72	-1.13618	2.79319e-08	7.88733e-08	down	PREDICTED: inactive TPR repeat-containing thioredoxin TTL3 [Cucumis melo]
CmoCh16G007500	4	0	0.17	0.001	-4.98373	0.00048829	0.000958718	down	PREDICTED: ETHYLENE INSENSITIVE 3-like 5 protein [Ziziphus jujuba]
CmoCh16G007670	27	9	0.71	0.25	-1.44486	2.35263e-06	5.80523e-06	down	PREDICTED: LOW QUALITY PROTEIN: BTB/POZ domain-containing protein DOT3 [Cucumis sativus]
CmoCh16G007790	3523.25	1348.19	76.93	30.81	-1.25787	0	0	down	PREDICTED: phosphoenolpyruvate carboxykinase [ATP]-like [Cucumis melo]
CmoCh16G007850	4	0	0.13	0.001	-4.98373	0.00048829	0.000958718	down	PREDICTED: LOW QUALITY PROTEIN: protein DETOXIFICATION 27-like [Cucumis melo]
CmoCh16G008030	371	129	9.7	3.53	-1.39518	4.13488e-68	5.08965e-67	down	PREDICTED: receptor-like cytosolic serine/threonine-protein kinase RBK1 [Cucumis melo]
CmoCh16G008040	90	25	2.51	0.73	-1.71517	2.39874e-23	1.28667e-22	down	PREDICTED: AP2-like ethylene-responsive transcription factor AIL6 [Cucumis melo]
CmoCh16G008520	4	0	0.27	0.001	-4.98373	0.00048829	0.000958718	down	PREDICTED: NAC domain-containing protein 55 [Cucumis melo]
CmoCh16G008570	6	1	0.83	0.15	-2.32517	0.00257689	0.00466403	down	PREDICTED: phytohormone-binding protein-like [Cucumis melo]
CmoCh16G008820	11	2	0.43	0.08	-2.26472	7.02604e-05	0.000151291	down	(+)-gamma-cadinene synthase [Cucumis melo]// B2KSJ5.1 RecName: Full=(+)-gamma-cadinene synthase; Short=CmTpsNY; AltName: Full=(+)-delta-cadinene synthase// ABX83200.1 terpene synthase [Cucumis melo]
CmoCh16G008890	2	0	0.27	0.001	-4.02862	0.0312501	0.0472645	down	ribosomal protein S13 (mitochondrion) [Cucumis melo subsp. melo]
CmoCh16G008950	238	46	18.29	3.73	-2.24026	1.14053e-83	1.67375e-82	down	chordin [Cucumis sativus]// ABA18632.1 plastid-lipid associated protein [Cucumis sativus]// ABA18633.1 plastid-lipid associated protein [Cucumis sativus]
CmoCh16G008990	3	0	2.42	0.001	-4.58381	0.00390629	0.00682066	down	-
[truncated: 1,818 more rows]
