# Supplementary material for: Transcriptomic analysis reveals ethylene signal transduction genes involved in pistil development of pumpkin
Source: PeerJ. 2020 Aug 18;8:e9677. doi: 10.7717/peerj.9677 (PMC7442037; doi:10.7717/peerj.9677)
Supplement: Supplemental Information 3 [file peerj-08-9677-s003.xlsx]

## Sheet: list
		Supplementary Table 3 List of plant hormone signal transduction pathway DEGs

## Sheet: Supplementary Table 3
Gene_ID	Normal_readcount	Aborted_readcount	log2(FC)	pvalue	p.adj	up-down-Regulation（Aborted/Normal）	Description	KEGG_A_class	KEGG_B_class	Pathway	K_ID
CmoCh01G018690	227	99	-1.06824	2.52298e-28	1.56289e-27	down	PREDICTED: cyclin-D3-3-like [Cucumis melo]	Environmental Information Processing	Signal transduction	ko04075//Plant hormone signal transduction	K14505
CmoCh01G020630	908	81	-3.35674	0	0	down	PREDICTED: probable serine/threonine-protein kinase At4g35230 [Cucumis melo]	Environmental Information Processing	Signal transduction	ko04075//Plant hormone signal transduction	K14500
CmoCh02G003140	415	188	-1.01387	1.55457e-46	1.4061e-45	down	auxin transporter-like protein 2 [Dorcoceras hygrometricum]	Environmental Information Processing	Signal transduction	ko04075//Plant hormone signal transduction	K13946
CmoCh02G003440	2	0	-4.02862	0.0312501	0.0472645	down	PREDICTED: auxin-responsive protein SAUR21-like [Cucumis melo]	Environmental Information Processing	Signal transduction	ko04075//Plant hormone signal transduction	K14488
CmoCh02G003480	0	2	4.14914	0.0312501	0.0472645	up	PREDICTED: auxin-responsive protein SAUR21-like [Cucumis melo]	Environmental Information Processing	Signal transduction	ko04075//Plant hormone signal transduction	K14488
CmoCh02G003490	0	7	5.89721	4.76866e-07	1.23566e-06	up	PREDICTED: auxin-responsive protein SAUR21-like [Cucumis melo]	Environmental Information Processing	Signal transduction	ko04075//Plant hormone signal transduction	K14488
CmoCh02G003510	0	3	4.70674	0.00390629	0.00682066	up	PREDICTED: auxin-responsive protein SAUR21-like [Cucumis melo]	Environmental Information Processing	Signal transduction	ko04075//Plant hormone signal transduction	K14488
CmoCh02G003580	26	0	-7.64506	5.2978e-23	2.81596e-22	down	PREDICTED: auxin-responsive protein SAUR64 [Cucumis melo]	Environmental Information Processing	Signal transduction	ko04075//Plant hormone signal transduction	K14488
CmoCh02G014250	2	11	2.51183	2.43017e-06	5.9869e-06	up	PREDICTED: auxin-responsive protein SAUR32-like [Cucumis melo]	Environmental Information Processing	Signal transduction	ko04075//Plant hormone signal transduction	K14488
CmoCh02G017950	2	0	-4.02862	0.0312501	0.0472645	down	PREDICTED: ethylene-responsive transcription factor 1B-like [Cucumis melo]	Environmental Information Processing	Signal transduction	ko04075//Plant hormone signal transduction	K14516
CmoCh03G001860	448	70	-2.54799	3.33199e-181	1.02718e-179	down	BTB domain-containing protein/DUF3420 domain-containing protein/Ank_2 domain-containing protein [Cephalotus follicularis]	Environmental Information Processing	Signal transduction	ko04075//Plant hormone signal transduction	K14508
CmoCh03G003400	30	3	-3.14382	1.78913e-16	7.60931e-16	down	PREDICTED: abscisic acid receptor PYL4 [Cucumis melo]	Environmental Information Processing	Signal transduction	ko04075//Plant hormone signal transduction	K14496
CmoCh04G003180	422	80	-2.26942	4.66573e-149	1.17217e-147	down	PREDICTED: two-component response regulator ARR5-like [Cucumis melo]	Environmental Information Processing	Signal transduction	ko04075//Plant hormone signal transduction	K14492
CmoCh04G004950	355	134	-1.27679	2.68716e-57	2.85608e-56	down	PREDICTED: probable indole-3-acetic acid-amido synthetase GH3.1 [Cucumis melo]	Environmental Information Processing	Signal transduction	ko04075//Plant hormone signal transduction	K14487
CmoCh04G008690	48	8	-2.43946	7.34081e-20	3.53014e-19	down	PREDICTED: ETHYLENE INSENSITIVE 3-like 5 protein [Ziziphus jujuba]	Environmental Information Processing	Signal transduction	ko04075//Plant hormone signal transduction	K14514
CmoCh04G011580	17	5	-1.61447	5.08549e-05	0.000111527	down	PREDICTED: abscisic acid receptor PYL4 [Cucumis melo]	Environmental Information Processing	Signal transduction	ko04075//Plant hormone signal transduction	K14496
CmoCh04G015610	2454	531	-2.08006	0	0	down	PREDICTED: auxin-responsive protein IAA32 [Cucumis melo]	Environmental Information Processing	Signal transduction	ko04075//Plant hormone signal transduction	K14484
CmoCh04G021750	4	0	-4.98373	0.00048829	0.000958718	down	PREDICTED: two-component response regulator ORR24 [Prunus mume]	Environmental Information Processing	Signal transduction	ko04075//Plant hormone signal transduction	K14491
CmoCh04G024530	160	34	-2.10254	1.84726e-52	1.82279e-51	down	PREDICTED: auxin transporter-like protein 3 [Cucumis melo]	Environmental Information Processing	Signal transduction	ko04075//Plant hormone signal transduction	K13946
CmoCh05G000700	134	58	-1.0785	1.29735e-17	5.76693e-17	down	PREDICTED: two-component response regulator ARR11 [Cucumis melo]	Environmental Information Processing	Signal transduction	ko04075//Plant hormone signal transduction	K14491
CmoCh05G003000	15	1	-3.62855	2.46526e-10	7.86919e-10	down	PREDICTED: auxin-induced protein 15A-like [Cucumis melo]	Environmental Information Processing	Signal transduction	ko04075//Plant hormone signal transduction	K14488
CmoCh05G010630	1051	413	-1.21927	5.75433e-163	1.56554e-161	down	PREDICTED: transcription factor PIF3 isoform X1 [Cucumis melo]	Organismal Systems;Environmental Information Processing	Signal transduction;Environmental adaptation	ko04075//Plant hormone signal transduction;ko04712//Circadian rhythm - plant	K12126
CmoCh05G012260	698	1537	1.2667	3.83023e-280	1.87497e-278	up	PREDICTED: auxin-responsive protein IAA16 isoform X1 [Cucumis melo]	Environmental Information Processing	Signal transduction	ko04075//Plant hormone signal transduction	K14484
CmoCh06G000150	19.41	7.46	-1.298	0.000216835	0.000442894	down	PREDICTED: TGACG-sequence-specific DNA-binding protein TGA-2.1 [Nicotiana tomentosiformis]	Environmental Information Processing	Signal transduction	ko04075//Plant hormone signal transduction	K14431
CmoCh06G004710	315	77	-1.90274	1.43333e-89	2.25085e-88	down	bZIP1 [Citrullus lanatus]	Environmental Information Processing	Signal transduction	ko04075//Plant hormone signal transduction	K14432
CmoCh06G009490	15	51	1.88445	3.22475e-17	1.41272e-16	up	PREDICTED: auxin-responsive protein IAA14-like [Cucumis melo]	Environmental Information Processing	Signal transduction	ko04075//Plant hormone signal transduction	K14484
CmoCh06G010150	27	12	-1.03455	0.000258316	0.000523893	down	Auxin responsive SAUR protein [Corchorus olitorius]	Environmental Information Processing	Signal transduction	ko04075//Plant hormone signal transduction	K14488
CmoCh06G010560	2960	422	-2.6819	0	0	down	PREDICTED: jasmonic acid-amido synthetase JAR1 [Cucumis melo]// XP_008437925.1 PREDICTED: jasmonic acid-amido synthetase JAR1 [Cucumis melo]// XP_016899070.1 PREDICTED: jasmonic acid-amido synthetase JAR1 [Cucumis melo]// ADN34174.1 auxin-regulated protein [Cucumis melo subsp. melo]	Environmental Information Processing	Signal transduction	ko04075//Plant hormone signal transduction	K14506
CmoCh07G006870	74	24	-1.49183	4.37578e-16	1.82888e-15	down	PREDICTED: probable indole-3-acetic acid-amido synthetase GH3.1 [Cucumis melo]	Environmental Information Processing	Signal transduction	ko04075//Plant hormone signal transduction	K14487
CmoCh08G003030	129	52	-1.18089	1.58442e-19	7.53133e-19	down	PREDICTED: auxin-induced protein AUX28-like [Cucumis melo]	Environmental Information Processing	Signal transduction	ko04075//Plant hormone signal transduction	K14484
CmoCh08G004320	84	37	-1.05241	3.827e-11	1.27737e-10	down	ethylene receptor 1 [Cucurbita pepo]	Environmental Information Processing	Signal transduction	ko04075//Plant hormone signal transduction	K14509
CmoCh08G006140	380	125	-1.47515	1.5397e-75	2.06492e-74	down	PREDICTED: auxin-induced protein IAA6 isoform X1 [Cucumis melo]	Environmental Information Processing	Signal transduction	ko04075//Plant hormone signal transduction	K14484
CmoCh08G010900	239	93	-1.2326	6.80882e-37	5.16803e-36	down	PREDICTED: auxin-induced protein 22B [Cucumis melo]	Environmental Information Processing	Signal transduction	ko04075//Plant hormone signal transduction	K14484
CmoCh08G011640	439	162	-1.30955	7.02072e-73	9.15717e-72	down	PREDICTED: histidine-containing phosphotransfer protein 1 isoform X1 [Cucumis melo]	Environmental Information Processing	Signal transduction	ko04075//Plant hormone signal transduction	K14490
CmoCh09G001100	251	102	-1.17014	6.96256e-36	5.15828e-35	down	PREDICTED: auxin-induced protein 15A-like [Ziziphus jujuba]// XP_015870353.1 PREDICTED: auxin-induced protein 15A-like [Ziziphus jujuba]	Environmental Information Processing	Signal transduction	ko04075//Plant hormone signal transduction	K14488
CmoCh09G002120	54	130	1.39336	2.86166e-27	1.72841e-26	up	PREDICTED: BRI1 kinase inhibitor 1-like [Cucumis melo]	Environmental Information Processing	Signal transduction	ko04075//Plant hormone signal transduction	K14499
CmoCh10G001650	0	3	4.70674	0.00390629	0.00682066	up	PREDICTED: two-component response regulator ARR5-like [Cucumis melo]	Environmental Information Processing	Signal transduction	ko04075//Plant hormone signal transduction	K14492
CmoCh10G005840	13	1	-3.42401	1.04808e-08	3.03991e-08	down	PREDICTED: EIN3-binding F-box protein 1-like [Cucumis melo]	Environmental Information Processing	Signal transduction	ko04075//Plant hormone signal transduction	K14515
CmoCh10G006330	76	22	-1.65512	6.68512e-19	3.10904e-18	down	PREDICTED: auxin-responsive protein IAA16-like [Cucumis melo]	Environmental Information Processing	Signal transduction	ko04075//Plant hormone signal transduction	K14484
CmoCh10G011050	2	0	-4.02862	0.0312501	0.0472645	down	PREDICTED: histidine-containing phosphotransfer protein 1-like [Cucumis melo]	Environmental Information Processing	Signal transduction	ko04075//Plant hormone signal transduction	K14490
CmoCh11G004020	269	722	1.55197	3.09321e-169	8.88934e-168	up	PREDICTED: xyloglucan endotransglucosylase/hydrolase protein 22 [Cucumis sativus]// KGN65439.1 Xyloglucan endotransglucosylase/hydrolase 2 [Cucumis sativus]	Environmental Information Processing	Signal transduction	ko04075//Plant hormone signal transduction	K14504
CmoCh11G013860	633	213	-1.4428	1.08366e-120	2.23379e-119	down	cyclin D3.2 protein [Lagenaria siceraria]	Environmental Information Processing	Signal transduction	ko04075//Plant hormone signal transduction	K14505
CmoCh11G014340	0	2.81	4.70674	0.00390629	0.00682066	up	PREDICTED: probable serine/threonine-protein kinase At4g35230 [Cucumis melo]	Environmental Information Processing	Signal transduction	ko04075//Plant hormone signal transduction	K14500
CmoCh12G002920	43	3	-3.6613	1.96603e-26	1.15605e-25	down	PREDICTED: auxin-responsive protein IAA29-like [Cucumis melo]	Environmental Information Processing	Signal transduction	ko04075//Plant hormone signal transduction	K14484
CmoCh12G003660	11	4	-1.30596	0.00660914	0.0111994	down	PREDICTED: auxin-induced protein 15A-like [Cucumis melo]	Environmental Information Processing	Signal transduction	ko04075//Plant hormone signal transduction	K14488
CmoCh12G004720	38.64	9.57	-1.82312	8.50396e-12	2.93255e-11	down	PREDICTED: BRI1 kinase inhibitor 1-like [Cucumis melo]	Environmental Information Processing	Signal transduction	ko04075//Plant hormone signal transduction	K14499
CmoCh13G003300	4	18	2.26118	2.14636e-08	6.1065e-08	up	PREDICTED: transcription factor HBP-1b(c38) [Cucumis sativus]	Environmental Information Processing	Signal transduction	ko04075//Plant hormone signal transduction	K14431
CmoCh14G000710	1282	2832	1.27138	0	0	up	PREDICTED: auxin transporter-like protein 2 [Cucumis melo]	Environmental Information Processing	Signal transduction	ko04075//Plant hormone signal transduction	K13946
CmoCh14G002960	194	74	-1.26106	2.087e-31	1.39504e-30	down	bZIP1 [Citrullus lanatus]	Environmental Information Processing	Signal transduction	ko04075//Plant hormone signal transduction	K14432
CmoCh14G005210	20	46	1.32403	1.03092e-09	3.16994e-09	up	PREDICTED: two-component response regulator ORR9-like [Cucumis melo]	Environmental Information Processing	Signal transduction	ko04075//Plant hormone signal transduction	K14492
CmoCh14G014260	149	668	2.29157	6.63248e-265	3.04145e-263	up	PREDICTED: indole-3-acetic acid-amido synthetase GH3.17-like [Cucumis melo]	Environmental Information Processing	Signal transduction	ko04075//Plant hormone signal transduction	K14487
CmoCh14G014480	26	0	-7.64506	5.2978e-23	2.81596e-22	down	PREDICTED: protein TIFY 9-like [Cucumis melo]	Environmental Information Processing	Signal transduction	ko04075//Plant hormone signal transduction	K13464
CmoCh14G018910	1228	448	-1.32647	1.59352e-218	5.97517e-217	down	PREDICTED: auxin-responsive protein IAA13 isoform X1 [Cucumis melo]	Environmental Information Processing	Signal transduction	ko04075//Plant hormone signal transduction	K14484
CmoCh14G021570	51	19	-1.2911	1.3069e-09	3.9936e-09	down	PREDICTED: jasmonic acid-amido synthetase JAR1 [Cucumis melo]// XP_008437925.1 PREDICTED: jasmonic acid-amido synthetase JAR1 [Cucumis melo]// XP_016899070.1 PREDICTED: jasmonic acid-amido synthetase JAR1 [Cucumis melo]// ADN34174.1 auxin-regulated protein [Cucumis melo subsp. melo]	Environmental Information Processing	Signal transduction	ko04075//Plant hormone signal transduction	K14506
CmoCh15G006810	125	41	-1.4775	6.67349e-26	3.87203e-25	down	PREDICTED: two-component response regulator ORR9-like isoform X2 [Cucumis melo]	Environmental Information Processing	Signal transduction	ko04075//Plant hormone signal transduction	K14492
CmoCh15G006820	17.63	3	-2.41101	5.71492e-08	1.57929e-07	down	PREDICTED: two-component response regulator ORR9-like isoform X2 [Cucumis melo]	Environmental Information Processing	Signal transduction	ko04075//Plant hormone signal transduction	K14492
CmoCh15G007120	88	38	-1.08107	5.64733e-12	1.96466e-11	down	PREDICTED: auxin transporter-like protein 3 [Cucumis melo]	Environmental Information Processing	Signal transduction	ko04075//Plant hormone signal transduction	K13946
CmoCh16G005850	1948	716	-1.31578	0	0	down	PREDICTED: auxin response factor 18-like [Cucumis melo]	Environmental Information Processing	Signal transduction	ko04075//Plant hormone signal transduction	K14486
CmoCh16G007500	4	0	-4.98373	0.00048829	0.000958718	down	PREDICTED: ETHYLENE INSENSITIVE 3-like 5 protein [Ziziphus jujuba]	Environmental Information Processing	Signal transduction	ko04075//Plant hormone signal transduction	K14514
CmoCh17G001860	8	15	1.02302	0.0055831	0.00954529	up	PREDICTED: auxin-responsive protein IAA14-like [Cucumis melo]	Environmental Information Processing	Signal transduction	ko04075//Plant hormone signal transduction	K14484
CmoCh17G005470	381	158	-1.14123	1.78256e-51	1.73902e-50	down	PREDICTED: abscisic acid receptor PYL8-like [Cucumis melo]	Environmental Information Processing	Signal transduction	ko04075//Plant hormone signal transduction	K14496
CmoCh17G007330	46	105	1.31628	1.1969e-20	5.93709e-20	up	PREDICTED: histidine-containing phosphotransfer protein 4 [Cucumis melo]	Environmental Information Processing	Signal transduction	ko04075//Plant hormone signal transduction	K14490
CmoCh17G007340	35	6	-2.39321	3.29471e-14	1.27585e-13	down	Phosphatase 2C family protein [Theobroma cacao]	Environmental Information Processing	Signal transduction	ko04075//Plant hormone signal transduction	K14497
CmoCh17G007960	772	102	-2.79055	0	0	down	PREDICTED: auxin-induced protein IAA6 isoform X1 [Cucumis melo]	Environmental Information Processing	Signal transduction	ko04075//Plant hormone signal transduction	K14484
CmoCh17G011160	81	27	-1.45288	5.67714e-17	2.46126e-16	down	PREDICTED: gibberellin receptor GID1B [Cucumis melo]	Environmental Information Processing	Signal transduction	ko04075//Plant hormone signal transduction	K14493
CmoCh17G011930	52	96	1.01074	7.92699e-13	2.87988e-12	up	PREDICTED: auxin-induced protein 22D-like [Cucumis melo]	Environmental Information Processing	Signal transduction	ko04075//Plant hormone signal transduction	K14484
CmoCh17G011940	141	386	1.58006	7.82933e-94	1.27302e-92	up	PREDICTED: auxin-induced protein AUX28-like [Cucumis melo]	Environmental Information Processing	Signal transduction	ko04075//Plant hormone signal transduction	K14484
CmoCh18G003950	2	0	-4.02862	0.0312501	0.0472645	down	PREDICTED: abscisic acid receptor PYL12-like [Gossypium arboreum]	Environmental Information Processing	Signal transduction	ko04075//Plant hormone signal transduction	K14496
CmoCh18G010050	414	1	-8.4031	0	0	down	PREDICTED: auxin-responsive protein IAA32 [Cucumis melo]	Environmental Information Processing	Signal transduction	ko04075//Plant hormone signal transduction	K14484
CmoCh18G012410	0	2	4.14914	0.0312501	0.0472645	up	PREDICTED: two-component response regulator ARR14-like [Cucumis melo]	Environmental Information Processing	Signal transduction	ko04075//Plant hormone signal transduction	K14491
CmoCh19G000970	6	0	-5.55341	1.52593e-05	3.49815e-05	down	PREDICTED: ethylene-responsive transcription factor 1B-like [Cucumis melo]	Environmental Information Processing	Signal transduction	ko04075//Plant hormone signal transduction	K14516
CmoCh19G005400	13	39	1.703	1.29993e-11	4.43998e-11	up	PREDICTED: basic form of pathogenesis-related protein 1 [Cucumis melo]	Organismal Systems;Environmental Information Processing	Signal transduction;Environmental adaptation	ko04075//Plant hormone signal transduction;ko04626//Plant-pathogen interaction	K13449
CmoCh19G005420	0	7	5.89721	4.76866e-07	1.23566e-06	up	PREDICTED: pathogenesis-related protein PRB1-2-like [Cucumis melo]	Organismal Systems;Environmental Information Processing	Signal transduction;Environmental adaptation	ko04075//Plant hormone signal transduction;ko04626//Plant-pathogen interaction	K13449
CmoCh19G005430	6	45	3.0077	6.55693e-26	3.806e-25	up	PREDICTED: pathogenesis-related protein PRB1-2-like [Cucumis melo]	Organismal Systems;Environmental Information Processing	Signal transduction;Environmental adaptation	ko04075//Plant hormone signal transduction;ko04626//Plant-pathogen interaction	K13449
CmoCh19G005440	0	6	5.67884	3.81487e-06	9.21372e-06	up	PREDICTED: pathogenesis-related protein PRB1-2-like [Cucumis melo]	Organismal Systems;Environmental Information Processing	Signal transduction;Environmental adaptation	ko04075//Plant hormone signal transduction;ko04626//Plant-pathogen interaction	K13449
CmoCh19G005450	0.02	8.64	6.25439	7.45132e-09	2.18118e-08	up	PREDICTED: pathogenesis-related protein PRB1-2-like [Cucumis melo]	Organismal Systems;Environmental Information Processing	Signal transduction;Environmental adaptation	ko04075//Plant hormone signal transduction;ko04626//Plant-pathogen interaction	K13449
CmoCh19G005480	17.98	112.36	2.75658	1.19383e-56	1.2558e-55	up	PREDICTED: pathogenesis-related protein PRB1-2-like [Cucumis melo]	Organismal Systems;Environmental Information Processing	Signal transduction;Environmental adaptation	ko04075//Plant hormone signal transduction;ko04626//Plant-pathogen interaction	K13449
CmoCh19G005490	0	7	5.89721	4.76866e-07	1.23566e-06	up	PREDICTED: pathogenesis-related protein PRB1-2-like [Cucumis melo]	Organismal Systems;Environmental Information Processing	Signal transduction;Environmental adaptation	ko04075//Plant hormone signal transduction;ko04626//Plant-pathogen interaction	K13449
CmoCh19G007230	2	7	1.86859	0.00371929	0.00657369	up	Auxin responsive SAUR protein [Cynara cardunculus var. scolymus]	Environmental Information Processing	Signal transduction	ko04075//Plant hormone signal transduction	K14488
CmoCh19G007270	3	0	-4.58381	0.00390629	0.00682066	down	PREDICTED: auxin-induced protein 15A [Cucumis melo]	Environmental Information Processing	Signal transduction	ko04075//Plant hormone signal transduction	K14488
CmoCh20G007800	2.02	0	-4.02862	0.0312501	0.0472645	down	PREDICTED: auxin-induced protein 15A-like [Cucumis sativus]	Environmental Information Processing	Signal transduction	ko04075//Plant hormone signal transduction	K14488
CmoCh20G007850	0	2	4.14914	0.0312501	0.0472645	up	PREDICTED: auxin-induced protein 15A-like [Cucumis sativus]	Environmental Information Processing	Signal transduction	ko04075//Plant hormone signal transduction	K14488
CmoCh20G007870	4	0	-4.98373	0.00048829	0.000958718	down	PREDICTED: auxin-responsive protein SAUR21-like [Cucumis melo]	Environmental Information Processing	Signal transduction	ko04075//Plant hormone signal transduction	K14488
CmoCh20G007990	12	40	1.8537	3.12157e-13	1.15757e-12	up	SAUR-like auxin-responsive protein family [Theobroma cacao]	Environmental Information Processing	Signal transduction	ko04075//Plant hormone signal transduction	K14488
