# Supplementary material for: Transcriptomic analysis reveals ethylene signal transduction genes involved in pistil development of pumpkin
Source: PeerJ. 2020 Aug 18;8:e9677. doi: 10.7717/peerj.9677 (PMC7442037; doi:10.7717/peerj.9677)
Supplement: Supplemental Information 5 [file peerj-08-9677-s005.xlsx]

## Sheet: list
			Supplementary Table 5 List of phenylpropanoid biosynthesis pathway DEGs

## Sheet: Supplementary Table 5
Gene_ID	Normal_readcount	Aborted_readcount	log2(FC)	pvalue	p.adj	up-down-Regulation（Aborted/Normal）	Description	KEGG_A_class	KEGG_B_class	Pathway	K_ID
CmoCh00G001520	294	593.9	1.14234	1.17051e-87	1.80725e-86	up	PREDICTED: peroxidase 2 [Cucumis melo]	Metabolism	Biosynthesis of other secondary metabolites	ko00940//Phenylpropanoid biosynthesis	K00430
CmoCh01G001310	3083	7821	1.47102	0	0	up	PREDICTED: caffeoylshikimate esterase [Cucumis melo]	Metabolism	Biosynthesis of other secondary metabolites	ko00940//Phenylpropanoid biosynthesis	K18368
CmoCh01G017290	42	15.17	-1.35042	1.85241e-08	5.2926e-08	down	PREDICTED: peroxidase 18 [Cucumis melo]	Metabolism	Biosynthesis of other secondary metabolites	ko00940//Phenylpropanoid biosynthesis	K00430
CmoCh01G017300	0	1.83	4.14914	0.0312501	0.0472645	up	PREDICTED: peroxidase 18 [Cucumis melo]	Metabolism	Biosynthesis of other secondary metabolites	ko00940//Phenylpropanoid biosynthesis	K00430
CmoCh02G006920	2216	5992	1.56306	0	0	up	PREDICTED: trans-cinnamate 4-monooxygenase [Cucumis melo]	Metabolism	Metabolism of cofactors and vitamins;Amino acid metabolism;Global and Overview;Biosynthesis of other secondary metabolites	ko00940//Phenylpropanoid biosynthesis;ko00360//Phenylalanine metabolism;ko00130//Ubiquinone and other terpenoid-quinone biosynthesis;ko00941//Flavonoid biosynthesis;ko00945//Stilbenoid, diarylheptanoid and gingerol biosynthesis;ko01220//Degradation of aromatic compounds	K00487
CmoCh02G012490	0	25.1	7.71617	1.3245e-23	7.15892e-23	up	PREDICTED: peroxidase 2 [Cucumis melo]	Metabolism	Biosynthesis of other secondary metabolites	ko00940//Phenylpropanoid biosynthesis	K00430
CmoCh02G012500	3037	1138	-1.28802	0	0	down	peroxidase 2-like precursor [Cucumis sativus]// AAA33127.1 peroxidase [Cucumis sativus]	Metabolism	Biosynthesis of other secondary metabolites	ko00940//Phenylpropanoid biosynthesis	K00430
CmoCh03G002530	3354.64	179	-4.09933	0	0	down	PREDICTED: spermidine hydroxycinnamoyl transferase-like [Cucumis melo]	Metabolism	Biosynthesis of other secondary metabolites	ko00940//Phenylpropanoid biosynthesis;ko00941//Flavonoid biosynthesis;ko00945//Stilbenoid, diarylheptanoid and gingerol biosynthesis	K13065
CmoCh03G008050	25	4	-2.48087	4.63066e-11	1.54132e-10	down	PREDICTED: UDP-glycosyltransferase 72E1 [Cucumis melo]	Metabolism	Biosynthesis of other secondary metabolites	ko00940//Phenylpropanoid biosynthesis	K12356
CmoCh03G008900	65	10	-2.55816	1.55284e-27	9.43688e-27	down	PREDICTED: 8-hydroxygeraniol dehydrogenase-like [Cucumis melo]	Metabolism	Biosynthesis of other secondary metabolites	ko00940//Phenylpropanoid biosynthesis	K00083
CmoCh03G010010	21	8	-1.25183	0.000130402	0.000273132	down	PREDICTED: peroxidase 10 [Cucumis melo]	Metabolism	Biosynthesis of other secondary metabolites	ko00940//Phenylpropanoid biosynthesis	K00430
CmoCh03G012270	30.4	11.67	-1.18586	1.38674e-05	3.20196e-05	down	PREDICTED: phenylalanine ammonia-lyase-like [Cucumis melo]	Metabolism	Amino acid metabolism;Biosynthesis of other secondary metabolites	ko00940//Phenylpropanoid biosynthesis;ko00360//Phenylalanine metabolism	K10775
CmoCh03G012290	133.81	41.63	-1.54304	1.77316e-29	1.13304e-28	down	PREDICTED: phenylalanine ammonia-lyase-like [Cucumis melo]	Metabolism	Amino acid metabolism;Biosynthesis of other secondary metabolites	ko00940//Phenylpropanoid biosynthesis;ko00360//Phenylalanine metabolism	K10775
CmoCh04G005010	402	847.97	1.20464	5.33321e-143	1.29273e-141	up	PREDICTED: cinnamyl alcohol dehydrogenase 1-like [Cucumis melo]	Metabolism	Biosynthesis of other secondary metabolites	ko00940//Phenylpropanoid biosynthesis	K00083
CmoCh04G016340	209	95	-1.00855	5.22937e-24	2.85955e-23	down	PREDICTED: LOW QUALITY PROTEIN: peroxidase 11 [Cucumis melo]	Metabolism	Biosynthesis of other secondary metabolites	ko00940//Phenylpropanoid biosynthesis	K00430
CmoCh04G030950	0	4.35	5.10789	0.00048829	0.000958718	up	PREDICTED: peroxidase 55-like [Cucumis melo]	Metabolism	Biosynthesis of other secondary metabolites	ko00940//Phenylpropanoid biosynthesis	K00430
CmoCh05G006990	7	0	-5.77141	1.90744e-06	4.7317e-06	down	PREDICTED: 4-coumarate--CoA ligase 2-like [Cucumis melo]	Metabolism	Metabolism of cofactors and vitamins;Amino acid metabolism;Biosynthesis of other secondary metabolites	ko00940//Phenylpropanoid biosynthesis;ko00360//Phenylalanine metabolism;ko00130//Ubiquinone and other terpenoid-quinone biosynthesis	K01904
CmoCh06G003640	11	21	1.05209	0.000674822	0.00130559	up	PREDICTED: peroxidase 21-like [Cucumis melo]	Metabolism	Biosynthesis of other secondary metabolites	ko00940//Phenylpropanoid biosynthesis	K00430
CmoCh06G006960	13	0	-6.65225	7.2773e-12	2.5171e-11	down	PREDICTED: caffeic acid 3-O-methyltransferase [Cucumis sativus]	Metabolism	Biosynthesis of other secondary metabolites	ko00940//Phenylpropanoid biosynthesis	K13066
CmoCh06G006980	3	0	-4.58381	0.00390629	0.00682066	down	PREDICTED: caffeic acid 3-O-methyltransferase-like [Cucumis melo]	Metabolism	Biosynthesis of other secondary metabolites	ko00940//Phenylpropanoid biosynthesis	K13066
CmoCh06G015780	2	0	-4.02862	0.0312501	0.0472645	down	PREDICTED: 1-Cys peroxiredoxin [Cucumis melo]	Metabolism	Biosynthesis of other secondary metabolites	ko00940//Phenylpropanoid biosynthesis	K11188
CmoCh07G006710	333	923	1.59847	2.32871e-248	1.00752e-246	up	PREDICTED: peroxidase 73-like [Cucumis sativus]// KGN48595.1 Class III peroxidase [Cucumis sativus]	Metabolism	Biosynthesis of other secondary metabolites	ko00940//Phenylpropanoid biosynthesis	K00430
CmoCh07G009470	55	23.01	-1.1257	1.66218e-08	4.76391e-08	down	phenylalanine ammonia-lyase 3 [Luffa aegyptiaca]	Metabolism	Amino acid metabolism;Biosynthesis of other secondary metabolites	ko00940//Phenylpropanoid biosynthesis;ko00360//Phenylalanine metabolism	K10775
CmoCh07G009540	44.23	2.94	-3.69437	3.07923e-27	1.85697e-26	down	phenylalanine ammonia-lyase 3 [Luffa aegyptiaca]	Metabolism	Amino acid metabolism;Biosynthesis of other secondary metabolites	ko00940//Phenylpropanoid biosynthesis;ko00360//Phenylalanine metabolism	K10775
CmoCh07G009550	37.11	6.73	-2.25473	3.79719e-14	1.46713e-13	down	phenylalanine ammonia-lyase 3 [Luffa aegyptiaca]	Metabolism	Amino acid metabolism;Biosynthesis of other secondary metabolites	ko00940//Phenylpropanoid biosynthesis;ko00360//Phenylalanine metabolism	K10775
CmoCh07G009560	21.09	7.06	-1.44145	2.18109e-05	4.93278e-05	down	PREDICTED: phenylalanine ammonia-lyase-like [Cucumis melo]	Metabolism	Amino acid metabolism;Biosynthesis of other secondary metabolites	ko00940//Phenylpropanoid biosynthesis;ko00360//Phenylalanine metabolism	K10775
CmoCh07G012030	37.34	84.53	1.32492	4.45757e-17	1.94108e-16	up	PREDICTED: spermidine hydroxycinnamoyl transferase-like [Cucumis melo]	Metabolism	Biosynthesis of other secondary metabolites	ko00940//Phenylpropanoid biosynthesis;ko00941//Flavonoid biosynthesis;ko00945//Stilbenoid, diarylheptanoid and gingerol biosynthesis	K13065
CmoCh08G004860	13	31	1.37293	2.19432e-07	5.83571e-07	up	PREDICTED: peroxidase 5-like [Cucumis melo]	Metabolism	Biosynthesis of other secondary metabolites	ko00940//Phenylpropanoid biosynthesis	K00430
CmoCh08G005430	46660.1	19959	-1.0971	0	0	down	PREDICTED: vicianin hydrolase-like [Cucumis melo]	Metabolism	Carbohydrate metabolism;Metabolism of other amino acids;Biosynthesis of other secondary metabolites	ko00500//Starch and sucrose metabolism;ko00940//Phenylpropanoid biosynthesis;ko00460//Cyanoamino acid metabolism	K01188
CmoCh08G005640	271	90	-1.46104	1.1559e-53	1.16095e-52	down	PREDICTED: 4-coumarate--CoA ligase 1-like [Cucumis melo]	Metabolism	Metabolism of cofactors and vitamins;Amino acid metabolism;Biosynthesis of other secondary metabolites	ko00940//Phenylpropanoid biosynthesis;ko00360//Phenylalanine metabolism;ko00130//Ubiquinone and other terpenoid-quinone biosynthesis	K01904
CmoCh08G005650	7	1	-2.54317	0.000488299	0.000958718	down	PREDICTED: 4-coumarate--CoA ligase 1-like [Cucumis melo]	Metabolism	Metabolism of cofactors and vitamins;Amino acid metabolism;Biosynthesis of other secondary metabolites	ko00940//Phenylpropanoid biosynthesis;ko00360//Phenylalanine metabolism;ko00130//Ubiquinone and other terpenoid-quinone biosynthesis	K01904
CmoCh09G003940	38	11	-1.64982	3.1901e-10	1.01196e-09	down	PREDICTED: peroxidase 18 [Cucumis melo]	Metabolism	Biosynthesis of other secondary metabolites	ko00940//Phenylpropanoid biosynthesis	K00430
CmoCh10G005900	152	21	-2.72062	2.25088e-67	2.74245e-66	down	PREDICTED: peroxidase 25-like [Cucumis melo]// ADN33762.1 peroxidase 25 precursor [Cucumis melo subsp. melo]	Metabolism	Biosynthesis of other secondary metabolites	ko00940//Phenylpropanoid biosynthesis	K00430
CmoCh10G006440	30	85	1.6263	8.58123e-23	4.52976e-22	up	PREDICTED: aldehyde dehydrogenase family 2 member C4 isoform X1 [Cucumis melo]	Metabolism	Biosynthesis of other secondary metabolites	ko00940//Phenylpropanoid biosynthesis	K12355
CmoCh10G009910	0	2	4.14914	0.0312501	0.0472645	up	silverleaf whitefly-induced protein 3 [Cucurbita pepo]	Metabolism	Carbohydrate metabolism;Metabolism of other amino acids;Biosynthesis of other secondary metabolites	ko00500//Starch and sucrose metabolism;ko00940//Phenylpropanoid biosynthesis;ko00460//Cyanoamino acid metabolism	K01188
CmoCh10G009940	112	14.93	-2.76266	1.67474e-50	1.61215e-49	down	PREDICTED: beta-glucosidase 12-like [Cucumis sativus]	Metabolism	Carbohydrate metabolism;Metabolism of other amino acids;Biosynthesis of other secondary metabolites	ko00500//Starch and sucrose metabolism;ko00940//Phenylpropanoid biosynthesis;ko00460//Cyanoamino acid metabolism	K01188
CmoCh10G009970	185	68	-1.31436	1.12514e-31	7.56314e-31	down	silverleaf whitefly-induced protein 3 [Cucurbita pepo]	Metabolism	Carbohydrate metabolism;Metabolism of other amino acids;Biosynthesis of other secondary metabolites	ko00500//Starch and sucrose metabolism;ko00940//Phenylpropanoid biosynthesis;ko00460//Cyanoamino acid metabolism	K01188
CmoCh10G010010	15	0	-6.85679	1.13715e-13	4.30433e-13	down	beta-D-glucoside glucohydrolase [Lotus japonicus]	Metabolism	Carbohydrate metabolism;Metabolism of other amino acids;Biosynthesis of other secondary metabolites	ko00500//Starch and sucrose metabolism;ko00940//Phenylpropanoid biosynthesis;ko00460//Cyanoamino acid metabolism	K01188
CmoCh10G010020	1768.52	170.97	-3.24192	0	0	down	Lactase-phlorizin hydrolase [Cajanus cajan]	Metabolism	Carbohydrate metabolism;Metabolism of other amino acids;Biosynthesis of other secondary metabolites	ko00500//Starch and sucrose metabolism;ko00940//Phenylpropanoid biosynthesis;ko00460//Cyanoamino acid metabolism	K01188
CmoCh11G001190	78.49	7.03	-3.32801	2.27363e-42	1.90633e-41	down	PREDICTED: peroxidase 41-like [Cucumis melo]	Metabolism	Biosynthesis of other secondary metabolites	ko00940//Phenylpropanoid biosynthesis	K00430
CmoCh11G001200	153.17	11	-3.65556	6.90765e-89	1.07739e-87	down	PREDICTED: peroxidase 41-like [Cucumis melo]	Metabolism	Biosynthesis of other secondary metabolites	ko00940//Phenylpropanoid biosynthesis	K00430
CmoCh11G008410	0	3	4.70674	0.00390629	0.00682066	up	PREDICTED: beta-glucosidase 12-like [Cucumis melo]	Metabolism	Carbohydrate metabolism;Metabolism of other amino acids;Biosynthesis of other secondary metabolites	ko00500//Starch and sucrose metabolism;ko00940//Phenylpropanoid biosynthesis;ko00460//Cyanoamino acid metabolism	K01188
CmoCh11G008420	6	15	1.43036	0.000226909	0.000462477	up	PREDICTED: beta-glucosidase 12-like [Cucumis melo]	Metabolism	Carbohydrate metabolism;Metabolism of other amino acids;Biosynthesis of other secondary metabolites	ko00500//Starch and sucrose metabolism;ko00940//Phenylpropanoid biosynthesis;ko00460//Cyanoamino acid metabolism	K01188
CmoCh11G011030	9	20	1.26786	9.06243e-05	0.00019285	up	PREDICTED: cytochrome P450 84A1-like [Cucumis melo]	Metabolism	Biosynthesis of other secondary metabolites	ko00940//Phenylpropanoid biosynthesis	K09755
CmoCh11G019770	555	126	-2.00999	6.07266e-168	1.71654e-166	down	PREDICTED: peroxidase P7-like [Cucumis melo]	Metabolism	Biosynthesis of other secondary metabolites	ko00940//Phenylpropanoid biosynthesis	K00430
CmoCh12G003450	4	0	-4.98373	0.00048829	0.000958718	down	PREDICTED: peroxidase 64-like [Gossypium hirsutum]	Metabolism	Biosynthesis of other secondary metabolites	ko00940//Phenylpropanoid biosynthesis	K00430
CmoCh13G007660	4475	888	-2.20506	0	0	down	PREDICTED: peroxidase 42 [Cucumis melo]// ADN34050.1 peroxidase [Cucumis melo subsp. melo]	Metabolism	Biosynthesis of other secondary metabolites	ko00940//Phenylpropanoid biosynthesis	K00430
CmoCh14G001930	64	3	-4.2336	3.47161e-42	2.89757e-41	down	PREDICTED: peroxidase 21-like [Cucumis melo]	Metabolism	Biosynthesis of other secondary metabolites	ko00940//Phenylpropanoid biosynthesis	K00430
CmoCh14G002160	201	77	-1.25492	2.94256e-32	2.01233e-31	down	PREDICTED: 4-coumarate--CoA ligase-like 7 [Cucumis melo]	Metabolism	Metabolism of cofactors and vitamins;Amino acid metabolism;Biosynthesis of other secondary metabolites	ko00940//Phenylpropanoid biosynthesis;ko00360//Phenylalanine metabolism;ko00130//Ubiquinone and other terpenoid-quinone biosynthesis	K01904
CmoCh14G010740	0	3	4.70674	0.00390629	0.00682066	up	PREDICTED: cinnamoyl-CoA reductase 2-like [Cucumis melo]	Metabolism	Biosynthesis of other secondary metabolites	ko00940//Phenylpropanoid biosynthesis	K09753
CmoCh14G010760	0	6	5.67884	3.81487e-06	9.21372e-06	up	PREDICTED: cinnamoyl-CoA reductase 2-like [Cucumis melo]	Metabolism	Biosynthesis of other secondary metabolites	ko00940//Phenylpropanoid biosynthesis	K09753
CmoCh16G003630	417	909	1.25201	2.28129e-163	6.21883e-162	up	PREDICTED: cinnamyl alcohol dehydrogenase 1-like [Cucumis melo]	Metabolism	Biosynthesis of other secondary metabolites	ko00940//Phenylpropanoid biosynthesis	K00083
CmoCh16G006910	3	0	-4.58381	0.00390629	0.00682066	down	PREDICTED: peroxidase 72-like [Cucumis melo]	Metabolism	Biosynthesis of other secondary metabolites	ko00940//Phenylpropanoid biosynthesis	K00430
CmoCh17G008740	342	957	1.61219	4.81029e-261	2.17687e-259	up	shikimate O-hydroxycinnamoyltransferase [Cucumis sativus]// AEJ88365.1 hydroxycinnamoyltransferase [Cucumis sativus]	Metabolism	Biosynthesis of other secondary metabolites	ko00940//Phenylpropanoid biosynthesis;ko00941//Flavonoid biosynthesis;ko00945//Stilbenoid, diarylheptanoid and gingerol biosynthesis	K13065
CmoCh17G008870	78	11	-2.68476	7.96327e-35	5.76031e-34	down	PREDICTED: 4-coumarate--CoA ligase 1-like [Cucumis melo]	Metabolism	Metabolism of cofactors and vitamins;Amino acid metabolism;Biosynthesis of other secondary metabolites	ko00940//Phenylpropanoid biosynthesis;ko00360//Phenylalanine metabolism;ko00130//Ubiquinone and other terpenoid-quinone biosynthesis	K01904
CmoCh18G006900	38	6	-2.51143	2.99458e-16	1.26116e-15	down	PREDICTED: flavonoid 3',5'-methyltransferase [Eucalyptus grandis]	Metabolism	Amino acid metabolism;Biosynthesis of other secondary metabolites	ko00940//Phenylpropanoid biosynthesis;ko00360//Phenylalanine metabolism;ko00941//Flavonoid biosynthesis;ko00945//Stilbenoid, diarylheptanoid and gingerol biosynthesis	K00588
CmoCh18G006920	501	2	-7.75731	0	0	down	PREDICTED: flavonoid 3',5'-methyltransferase-like isoform X1 [Pyrus x bretschneideri]	Metabolism	Amino acid metabolism;Biosynthesis of other secondary metabolites	ko00940//Phenylpropanoid biosynthesis;ko00360//Phenylalanine metabolism;ko00941//Flavonoid biosynthesis;ko00945//Stilbenoid, diarylheptanoid and gingerol biosynthesis	K00588
CmoCh18G010930	5	0	-5.29651	6.10368e-05	0.00013234	down	PREDICTED: LOW QUALITY PROTEIN: peroxidase 11 [Cucumis melo]	Metabolism	Biosynthesis of other secondary metabolites	ko00940//Phenylpropanoid biosynthesis	K00430
CmoCh19G002210	10728	31495	1.68177	0	0	up	PREDICTED: 4-coumarate--CoA ligase-like 6 [Cucumis melo]	Metabolism	Metabolism of cofactors and vitamins;Amino acid metabolism;Biosynthesis of other secondary metabolites	ko00940//Phenylpropanoid biosynthesis;ko00360//Phenylalanine metabolism;ko00130//Ubiquinone and other terpenoid-quinone biosynthesis	K01904
CmoCh19G011310	25	9	-1.33438	2.2375e-05	5.05083e-05	down	class III peroxidase [Populus trichocarpa]	Metabolism	Biosynthesis of other secondary metabolites	ko00940//Phenylpropanoid biosynthesis	K00430
CmoCh20G000520	25	1417.99	5.94643	0	0	up	PREDICTED: peroxidase 2-like [Cucumis melo]	Metabolism	Biosynthesis of other secondary metabolites	ko00940//Phenylpropanoid biosynthesis	K00430
CmoCh20G000530	1591	56	-4.69737	0	0	down	class III peroxidase precursor [Cucurbita pepo]	Metabolism	Biosynthesis of other secondary metabolites	ko00940//Phenylpropanoid biosynthesis	K00430
CmoCh20G000540	2083	40	-5.57027	0	0	down	class III peroxidase precursor [Cucurbita pepo]	Metabolism	Biosynthesis of other secondary metabolites	ko00940//Phenylpropanoid biosynthesis	K00430
CmoCh20G000550	15	0	-6.85679	1.13715e-13	4.30433e-13	down	peroxidase 2-like precursor [Cucumis sativus]// AAA33127.1 peroxidase [Cucumis sativus]	Metabolism	Biosynthesis of other secondary metabolites	ko00940//Phenylpropanoid biosynthesis	K00430
CmoCh20G003160	17	34	1.12207	3.38906e-06	8.23002e-06	up	PREDICTED: peroxidase 7-like [Cucumis melo]	Metabolism	Biosynthesis of other secondary metabolites	ko00940//Phenylpropanoid biosynthesis	K00430
CmoCh20G003310	12347	23978	1.08558	0	0	up	PREDICTED: trans-cinnamate 4-monooxygenase [Cucumis melo]	Metabolism	Metabolism of cofactors and vitamins;Amino acid metabolism;Global and Overview;Biosynthesis of other secondary metabolites	ko00940//Phenylpropanoid biosynthesis;ko00360//Phenylalanine metabolism;ko00130//Ubiquinone and other terpenoid-quinone biosynthesis;ko00941//Flavonoid biosynthesis;ko00945//Stilbenoid, diarylheptanoid and gingerol biosynthesis;ko01220//Degradation of aromatic compounds	K00487
CmoCh20G005320	13820	25299	1.00036	0	0	up	phenylalanine ammonia-lyase 4 [Luffa aegyptiaca]	Metabolism	Amino acid metabolism;Biosynthesis of other secondary metabolites	ko00940//Phenylpropanoid biosynthesis;ko00360//Phenylalanine metabolism	K10775
CmoCh20G010910	1209.01	2652	1.26122	0	0	up	PREDICTED: probable mannitol dehydrogenase [Cucumis melo]	Metabolism	Biosynthesis of other secondary metabolites	ko00940//Phenylpropanoid biosynthesis	K00083
